# Supplementary material for: Efficient asymmetric synthesis of trifluoromethylated β-aminophosphonates and their incorporation into dipeptides
Source: Royal Society of Chemistry journal article supplement (doi:10.1039/c2cc36702e), 2012-01-01

## Efficient asymmetric synthesis of trifluoromethylated $\beta$ -aminophosphonates and their incorporation into dipeptides

Kostiantyn V. Turcheniuk, Kateryna O. Polyashko, Valery P. Kukhar, Alexander B. Rozhenko,  
Alexander E. Sorochinsky, Vadim A. Soloshonok

### CONTENTS

S1: General Information

S2-S6: Experimental procedures and characterization data for products.

S7: X-ray data

S8-S39: copies of  $^1\text{H}$ ,  $^{13}\text{C}$ ,  $^{19}\text{F}$  and  $^{31}\text{P}$ -NMR for products

**General Information.** NMR spectra were recorded on a Bruker DRX 500 or Varian Union Plus 400 spectrometers using TMS ( $^1\text{H}$ ) and  $\text{CFCl}_3$  ( $^{19}\text{F}$ ) as an internal standards and  $\text{H}_3\text{PO}_4$  ( $^{31}\text{P}$ ) as an external standard. Chemical shifts ( $\delta$ ) are reported in ppm. J values are given in Hz. Analytical TLCs were performed with Merck Silica gel 60  $\text{F}_{254}$  plates. Visualization was accomplished by spraying with solution of ceric ammonium molybdate followed by brief heating. Flash chromatography was carried out using Merck Silica gel 60 (0.040-0.063 mm). IR spectra were recorded on Bruker VERTEX 70 FT-IR spectrometer. Absorption bands are reported in  $\text{cm}^{-1}$ . Optical rotations were measured on Anton Paar MCP 300 Modular Circular Polarimeter with a 1.0 dm cell length, wavelength 589 nm,  $[\alpha]_{\text{D}}$  values are given in deg.

### Synthesis of (*S,S,R*)-dialkyl 2-(*tert*-butylsulfinylamino)-3,3,3-trifluoropropylphosphonates **4a-d**; General Procedure.

To a solution of appropriate dialkyl methylphosphonate (2.2 mmol) in THF (4 mL) *n*-BuLi (1.25 mL, 1.6 M in hexane, 2.0 mmol) was added dropwise via syringe at -78 °C and reaction mixture was stirred at this temperature for 1 h. Then pre-cooled to -78 °C solution of imine (*S*)-**1** (201 mg, 1.0 mmol) in THF (2 mL) was transferred *via* cannula into reaction mixture. After additional stirring for 0.5 h at -78 °C the reaction mixture was quenched by addition of saturated aqueous NH<sub>4</sub>Cl (6 mL) and warmed to room temperature. The solution was extracted with EtOAc (3 x 10 mL) and the combined organic phases were dried (Na<sub>2</sub>SO<sub>4</sub>) and concentrated. The residue was dried under a high vacuum pump (0.5 mm Hg) at 30-35 °C to remove excess of dialkyl methylphosphonate. The diastereoselectivity was determined by <sup>19</sup>F and <sup>31</sup>P NMR spectroscopy. Purification by flash chromatography afforded (*S,S,R*)-**4a-d** with 96-98% de.

#### (*S,S,R*)-Dimethyl 2-(*tert*-butylsulfinylamino)-3,3,3-trifluoropropylphosphonate (**4a**).

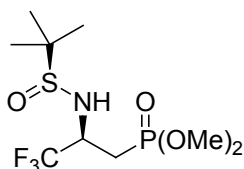

Purification by flash chromatography on silica gel, eluent ethyl acetate-ethanol 10:0.4; yield 53%, mp 123-125 °C (from hexane); white needles; [ $\alpha$ ]<sub>D</sub><sup>20</sup> +4.9 (*c* = 1.90, CHCl<sub>3</sub>). IR (KBr): 3231, 2967, 2935, 2877, 1474, 1265, 1230, 1126, 1038 cm<sup>-1</sup>;  $\delta$ <sub>H</sub> (400 MHz, CDCl<sub>3</sub>, Me<sub>4</sub>Si) 1.22 (9 H, s), 2.17-2.24 (2 H, m), 3.73 (3 H, d, *J* = 3.3), 3.75 (3 H, d, *J* = 3.3), 4.01-4.12 (1 H, m), 4.56-4.60 (1 H, m);  $\delta$ <sub>C</sub> (100 MHz, CDCl<sub>3</sub>, Me<sub>4</sub>Si) 22.4 (s), 25.4 (d, *J*<sub>C-P</sub> = 147.5), 52.7 (d, *J*<sub>C-P</sub> = 6.6), 52.9 (d, *J*<sub>C-P</sub> = 6.6), 53.5 (qd, *J*<sub>C-F</sub> = 31.5, *J*<sub>C-P</sub> = 4.4), 57.4 (s), 124.6 (qd, *J*<sub>C-F</sub> = 283.2, *J*<sub>C-P</sub> = 16.1);  $\delta$ <sub>F</sub> (376 MHz, CDCl<sub>3</sub>, CFCl<sub>3</sub>) -76.0 (d, *J* = 6.0);  $\delta$ <sub>P</sub> (202 MHz, CDCl<sub>3</sub>, H<sub>3</sub>PO<sub>4</sub>) 28.8 (s); MS(API-ES): *m/z* = 326.0 [*M* + *H*]<sup>+</sup>; Found: C, 33.3; H, 6.0; N, 4.7; P, 9.4; S, 10.0. Calc. for C<sub>9</sub>H<sub>19</sub>F<sub>3</sub>NO<sub>4</sub>PS: C, 33.2; H, 5.9; N, 4.3; P, 9.5; S, 9.9%.

#### (*S,S,R*)-Diethyl 2-(*tert*-butylsulfinylamino)-3,3,3-trifluoropropylphosphonate (**4b**).

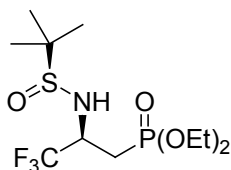

Purification by flash chromatography on silica gel, eluent ethyl acetate-ethanol 10:0.2, followed by crystallisation from hexane-ethyl acetate, yield 55%; white needles; mp 123-124 °C (from hexane-ethylacetate); [ $\alpha$ ]<sub>D</sub><sup>20</sup> +6.6 (*c* = 1.28, CHCl<sub>3</sub>). IR (KBr) 3186, 2987, 2935, 2875, 1410,

1264, 1229  $\text{cm}^{-1}$ ;  $^1\text{H}$  NMR (400 MHz,  $\text{CDCl}_3$ ):  $\delta_{\text{H}}$  (400 MHz,  $\text{CDCl}_3$ ,  $\text{Me}_4\text{Si}$ ) 1.21 (9 H, s), 1.29 (3 H, t,  $J = 7.0$ ), 1.30 (3 H, t,  $J = 7.0$ ), 2.15-2.22 (2 H, m), 3.04-4.13 (5 H, m), 4.48 (1 H, dm,  $J = 9.8$ );  $\delta_{\text{C}}$  (100 MHz,  $\text{CDCl}_3$ ,  $\text{Me}_4\text{Si}$ ) 16.3 (d,  $J = 3.7$ ), 16.4 (d,  $J = 3.7$ ), 22.4 (s), 26.6 (d,  $J = 145.3$ ), 54.1 (qd,  $J_{\text{C-F}} = 31.5$ ,  $J_{\text{C-P}} = 5.1$ ), 57.3 (s), 62.2 (d,  $J = 6.6$ ), 62.4 (d,  $J = 6.6$ ), 124.7 (qd,  $J_{\text{C-F}} = 283.2$ ,  $J_{\text{C-P}} = 15.4$ );  $\delta_{\text{F}}$  (376 MHz,  $\text{CDCl}_3$ ,  $\text{CFCl}_3$ )  $-75.6$  (d,  $J = 7.1$ );  $\delta_{\text{P}}$  (202 MHz,  $\text{CDCl}_3$ ,  $\text{H}_3\text{PO}_4$ ) 26.0 (s); MS(API-ES):  $m/z = 354.2$  [ $\text{M} + \text{H}$ ] $^+$ ; Found: C, 37.2; H, 6.55; N, 4.1; P, 8.9; S, 9.4. Calc. for  $\text{C}_{11}\text{H}_{23}\text{F}_3\text{NO}_4\text{PS}$ : C, 37.4; H, 6.6; N, 4.0; P, 8.8; S, 9.1%.

**(*S,S,R*)-Dipropyl 2-(*tert*-butylsulfinylamino)-3,3,3-trifluoropropylphosphonate (4c)**

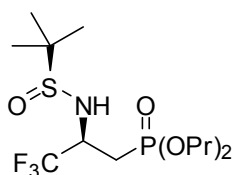

Purification by flash chromatography on silica gel, eluent ethyl acetate-ethanol 10:0.2; yield 68%, mp 73-75  $^{\circ}\text{C}$  (from hexane); white needles;  $[\alpha]_{\text{D}}^{20} +2.8$  ( $c = 1.12$ ,  $\text{CHCl}_3$ ). IR (KBr): 3483, 3177, 2970, 1474, 1062, 1002, 873, 505  $\text{cm}^{-1}$ ;  $\delta_{\text{H}}$  (400 MHz,  $\text{CDCl}_3$ ,  $\text{Me}_4\text{Si}$ ) 0.95 (6 H, br t,  $J = 7.0$ ), 1.24 (9 H, s), 1.64-1.73 (4 H, m), 2.20-2.25 (2 H, m), 4.00 (4 H, br quint), 4.03-4.13 (1 H, m), 4.54 (1 H, d,  $J = 8.82$ );  $\delta_{\text{C}}$  (100 MHz,  $\text{CDCl}_3$ ,  $\text{Me}_4\text{Si}$ ) 9.9 (s), 10.0 (s), 22.3 (s), 23.7 (d,  $J = 2.0$ ), 23.8 (d,  $J = 2.0$ ), 26.4 (d,  $J_{\text{C-P}} = 145.6$ ), 54.0 (qd,  $J_{\text{C-F}} = 31.9$ ,  $J_{\text{C-P}} = 5.0$ ), 57.3 (s), 67.7 (d,  $J = 6.9$ ), 67.9 (d,  $J = 6.9$ ), 124.7 (qd,  $J_{\text{C-F}} = 283.2$ ,  $J_{\text{C-P}} = 16.0$ );  $\delta_{\text{F}}$  (376 MHz,  $\text{CDCl}_3$ ,  $\text{CFCl}_3$ )  $-75.7$  (d,  $J = 5.7$ );  $\delta_{\text{P}}$  (202 MHz,  $\text{CDCl}_3$ ,  $\text{H}_3\text{PO}_4$ ) 26.0 (s); MS(API-ES):  $m/z = 383.2$  [ $\text{M} + \text{H}$ ] $^+$ ; Found: C, 40.85; H, 7.2; N, 3.7; P, 7.9; S, 8.7. Calc. for  $\text{C}_{13}\text{H}_{27}\text{F}_3\text{NO}_4\text{PS}$ : C, 40.9; H, 7.1; N, 3.7; P, 8.1; S, 8.4%.

**(*S,S,R*)- Diisopropyl 2-(*tert*-butylsulfinylamino)-3,3,3-trifluoropropylphosphonate (4d)**

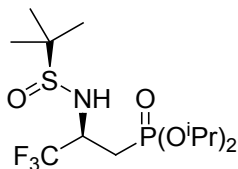

Purification by flash chromatography on silica gel, eluent ethyl acetate-ethanol 10:0.2; yield 75%, mp 64-65  $^{\circ}\text{C}$  (from hexane); white needles;  $[\alpha]_{\text{D}}^{20} +1.2$  ( $c = 1.67$ ,  $\text{CHCl}_3$ ). IR (KBr): 3443, 3116, 2988, 2932, 1265, 1219, 1059, 983  $\text{cm}^{-1}$ ;  $\delta_{\text{H}}$  (400 MHz,  $\text{CDCl}_3$ ,  $\text{Me}_4\text{Si}$ ) 1.20 (9 H, s), 1.26 (6 H, t,  $J = 2.4$ ), 1.28 (6 H, t,  $J = 2.4$ ), 2.09-2.16 (2 H, m), 3.94-4.07 (1 H, m), 4.55 (1 H, d,  $J = 9.4$ ), 4.62-4.72 (2 H, m);  $\delta_{\text{C}}$  (100 MHz,  $\text{CDCl}_3$ ,  $\text{Me}_4\text{Si}$ ) 22.5(s), 23.9 (d,  $J = 4.4$ ), 24.0 (d,  $J = 5.9$ ), 24.1 (br s), 24.2 (d,  $J = 4.8$ ), 28.0 (d,  $J = 146.7$ ), 54.2 (qd,  $J = 31.6$ ,  $J = 5.1$ ), 57.3 (s), 71.2 (d,  $J = 6.6$ ), 71.4 (d,  $J = 6.6$ ), 124.8 (qd,  $J = 283.6$ ,  $J = 15.4$ );  $\delta_{\text{F}}$  (376 MHz,  $\text{CDCl}_3$ ,  $\text{CFCl}_3$ )  $-$

75.4 (d,  $J = 6.8$ );  $\delta_P$  (202 MHz,  $\text{CDCl}_3$ ,  $\text{H}_3\text{PO}_4$ ) 23.9 (s); MS(API-ES):  $m/z = 382.2$   $[\text{M} + \text{H}]^+$ ; Found: C, 41.0; H, 7.1; N, 3.4; P, 7.9; S, 8.55. Calc. for  $\text{C}_{13}\text{H}_{27}\text{F}_3\text{NO}_4\text{PS}$ : C, 40.9; H, 7.1; N, 3.7; P, 8.1; S, 8.4%.

**(R)-Diethyl 2-amino-3,3,3-trifluoroethylphosphonate (5).**

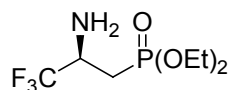

A solution of *N*-sulfinyl  $\beta$ -aminophosphonate ( $S_S,R$ )-**4b** (280 mg, 0.79 mmol) in alcohol (3.5 mL) and 4 N HCl (3.5 mL) was stirred at room temperature for 18 h. The resulting solution was concentrated under reduced pressure, residue was dissolved in  $\text{CH}_2\text{Cl}_2$  (4 mL) and neutralized to pH 7.5 with saturated  $\text{NaHCO}_3$ . The organic layer was separated, and the aqueous layer was extracted with  $\text{CH}_2\text{Cl}_2$  ( $3 \times 2$  mL). The combined organic layers were washed with water (5 mL), dried over  $\text{Na}_2\text{SO}_4$  and concentrated to give 165 mg (83.5%) of **5** as white solid, mp 71-72°C (from hexane);  $[\alpha]_D^{20} -21.2$  ( $c = 1.71$ ,  $\text{CHCl}_3$ ). IR (KBr): 3386, 2989, 1254, 1232, 1168, 1116, 1031, 980, 523  $\text{cm}^{-1}$ ;  $\delta_H$  (400 MHz,  $\text{CDCl}_3$ ,  $\text{Me}_4\text{Si}$ ) 1.27 (3 H, t,  $J = 2.4$ ), 1.28 (3 H, t,  $J = 2.4$ ), 1.74 (2 H, s), 1.83 (1 H, ddd,  $J = 11.4$ ,  $J_{\text{H-H}} = 15.4$ ,  $J = 17.3$ ), 2.08 (1 H, ddd,  $J = 20.7$ ,  $J_{\text{H-H}} = 15.4$ , 2.2), 3.55-3.66 (1 H, m), 4.03-4.14 (4 H, m);  $\delta_C$  (100 MHz,  $\text{CDCl}_3$ ,  $\text{Me}_4\text{Si}$ ) 16.4 (s), 16.5 (s), 27.1 (d,  $J = 146.7$ ), 49.9 (qd,  $J_{\text{C-F}} = 30.8$ ,  $J_{\text{C-P}} = 4.4$ ), 62.1 (d,  $J = 6.6$ ), 62.3 (d,  $J = 5.8$ ), 125.8 (qd,  $J_{\text{C-F}} = 280.1$ ,  $J_{\text{C-P}} = 23.2$ );  $\delta_F$  (376 MHz,  $\text{CDCl}_3$ ,  $\text{CFCl}_3$ ) -80.4 (d,  $J = 6.0$ );  $\delta_P$  (202 MHz,  $\text{CDCl}_3$ ,  $\text{H}_3\text{PO}_4$ ) 28.1 (s); MS(API-ES):  $m/z = 250.2$   $[\text{M} + \text{H}]^+$ ; Found: C, 33.8; H, 6.2; N, 5.5; P, 12.6. Calc. for  $\text{C}_7\text{H}_{15}\text{F}_3\text{NO}_3\text{P}$ : C, 33.7; H, 6.1; N, 5.6; P, 12.4%.

**(R)-2-Amino-3,3,3-trifluoropropylphosphonic acid (6)**

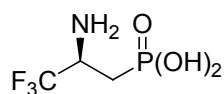

A solution of (*R*)-**5** (249 mg, 1 mmol) in 10 N HCl (6 mL) was refluxed for 6 h and then concentrated under reduce pressure to dryness. The resulting solid was treated with EtOH (3 mL) and propylene oxide (0.25 mL, 3.00 mmol) and the reaction mixture was stirred for 3 h. Precipitate was filtered off and washed with ether to provide product **6** (192 mg, 99%) as a white solid; mp 301-302 °C;  $[\alpha]_D^{20} -14.7$  ( $c = 1.10$ ,  $\text{H}_2\text{O}$ ); IR (KBr): 3005, 2819, 2567, 1287, 1219, 1172, 1113, 1012  $\text{cm}^{-1}$ ;  $\delta_H$  (400 MHz,  $\text{D}_2\text{O} + \text{CH}_3\text{CN}$ ) 1.85-1.96 (1 H, m), 2.08-2.18 (1 H, m), 4.10-4.21 (1 H, m);  $\delta_C$  (100 MHz,  $\text{D}_2\text{O} + \text{CH}_3\text{CN}$ ,  $\text{Me}_4\text{Si}$ ) 24.7 (d,  $J = 131.3$ ), 50.0 (qd,  $J_{\text{C-F}} = 33.7$ ,  $J_{\text{C-P}} = 3.7$ ), 123.9 (qd,  $J_{\text{C-F}} = 280.2$ ,  $J_{\text{C-P}} = 19.0$ );  $\delta_F$  (376 MHz,  $\text{D}_2\text{O}$ ,  $\text{CFCl}_3$ ) -74.2 (d,  $J = 6.8$ );  $\delta_P$  (202 MHz,  $\text{D}_2\text{O}$ ,  $\text{H}_3\text{PO}_4$ ) 22.7 (s); MS(API-ES):  $m/z = 194.0$   $[\text{M} + \text{H}]^+$ ; Found: C, 18.4; H, 3.9; N, 7.1; P, 15.9. Calc. for  $\text{C}_3\text{H}_7\text{F}_3\text{NO}_3\text{P}$ : C, 18.7; H, 3.65; N, 7.3; P, 16.1%.

**General Procedure for Coupling of (*R*)-Diethyl 2-amino-3,3,3-trifluoroethylphosphonate (5).**

*N*-Methyl-morpholine (0.36 mmol) and isobutyl chloroformate (0.43 mmol) were added to a stirred solution of amino acid (0.36 mmol) in absolute ethyl acetate (16 mL) at -15 °C. After 30 min (*R*)-5 (90 mg, 0.36 mmol) in dry ethyl acetate (10 mL) was added. The reaction mixture was stirred at -15 °C for 1 h and then at room temperature overnight. The reaction mixture was washed successively with H<sub>2</sub>O, dilute citric acid, H<sub>2</sub>O, saturated solution of NaHCO<sub>3</sub> and H<sub>2</sub>O. The organic layer was dried over Na<sub>2</sub>SO<sub>4</sub> and concentrated under reduced pressure. Residue was treated with hexane and precipitate was filtered off.

**(*S,R*)-Diethyl 2-(*N*-Cbz-alanyl-amino)-3,3,3-trifluoroethylphosphonate (7)**

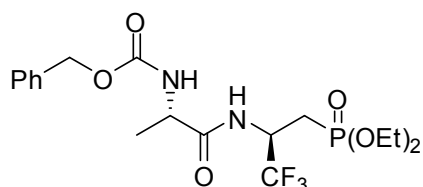

White solid; yield 55 %; mp 126–128 °C (from hexane-ethyl acetate);  $[\alpha]_{\text{D}}^{20} +4.3$  (c 1.0, CHCl<sub>3</sub>);  $\delta_{\text{H}}$  NMR (400 MHz, CDCl<sub>3</sub>, Me<sub>4</sub>Si) 1.31 (3 H, t,  $J = 6.8$ ), 1.32 (3 H, t,  $J = 6.8$ ), 1.41 (3 H, d,  $J = 6.8$ ), 2.03 – 2.24 (2 H, m), 4.04 – 4.13 (4 H, m), 4.38 (1 H, br s), 4.88–5.01 (1 H, m), 5.13 (2 H, s), 5.74 (1 H, br s), 7.01 (1 H, br s), 7.32–7.37 (5 H, m, Ph);  $\delta_{\text{C}}$  (100 MHz, CDCl<sub>3</sub>, Me<sub>4</sub>Si) 16.3 (s), 16.3 (s), 18.5 (s), 24.9 (d,  $J = 148.6$ ), 46.3 (qd,  $J = 32.0$ ,  $J = 5.0$ ), 50.6 (s), 62.3 (d,  $J = 6.0$ ), 62.8 (d,  $J = 6.0$ ), 67.0 (s), 124.5 (qd,  $J_{\text{C-F}} = 282.2$ ,  $J_{\text{C-P}} = 20.4$ ), 128.1, 128.2, 128.5, 136.3, 156.0, 172.5;  $\delta_{\text{F}}$  (376 MHz, CDCl<sub>3</sub>, CFCl<sub>3</sub>) -76.2 (d,  $J = 6.9$ );  $\delta_{\text{P}}$  (162 MHz, CDCl<sub>3</sub>, H<sub>3</sub>PO<sub>4</sub>) 29.0 (s); MS(API-ES):  $m/z = 455.2$  [M + H]<sup>+</sup>; Found: C, 47.3; H, 5.9; N, 6.3; P, 6.6. Calc. for C<sub>18</sub>H<sub>26</sub>F<sub>3</sub>N<sub>2</sub>O<sub>6</sub>P: C, 47.6; H, 5.8; N, 6.2; P, 6.8%.

**(*S,R*)-Diethyl 2-(*N*-Cbz-phenylalanyl-amino)-3,3,3-trifluoropropylphosphonate (8)**

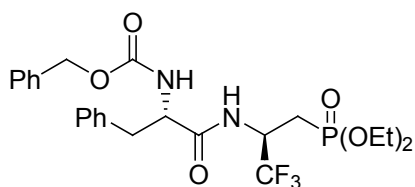

White solid; yield 60%; mp 144–146 °C (from hexane-ethyl acetate);  $[\alpha]_{\text{D}}^{20} -4.0$  (c 1.08 in CHCl<sub>3</sub>); IR (KBr): 3325, 3280, 3069, 3038, 2975, 1692, 1670, 1538, 1269; cm<sup>-1</sup>;  $\delta_{\text{H}}$  (400 MHz, CDCl<sub>3</sub>, Me<sub>4</sub>Si) 1.28 (3 H, t,  $J = 6.9$ ), 1.30 (3 H, t,  $J = 6.9$ ), 1.94–2.21 (2 H, m), 2.96–3.06 (1 H, m), 3.20 (1 H, dd,  $J = 13.7$ ,  $J = 6.2$ ), 3.98–4.12 (4 H, m), 4.51 (1 H, m), 4.92 (1 H, m), 5.04 (2 H,

**S6**

s), 5.54 (1 H, d,  $J = 8.1$ ), 6.71 (1 H, m), 7.18 – 7.34 (10 H, m);  $\delta_C$  (100 MHz,  $CDCl_3$ ,  $Me_4Si$ ) 16.3 (d,  $J = 2.9$ ), 16.4 (d,  $J = 2.9$ ), 24.9 (d,  $J = 146.0$ ), 38.5 (s), 46.4 (qd,  $J = 32.3$ ,  $J = 5.1$ ), 56.2 (s), 62.4 (d,  $J = 6.6$ ), 62.9 (d,  $J = 6.6$ ), 66.9 (s), 126.9, 128.0, 128.1, 128.5, 128.6, 129.5, 136.3, 136.4, 156.0, 171.3;  $\delta_F$  (376 MHz,  $CDCl_3$ ,  $CFCl_3$ ) –77.1 (br s);  $\delta_P$  (202 MHz,  $CDCl_3$ ,  $H_3PO_4$ ) 26.2 (s); MS(API-ES):  $m/z = 531.2 [M + H]^+$ ; Found: C, 54.38; H, 5.98; N, 5.4; P, 5.8. Calc. for  $C_{24}H_{30}F_3N_2O_6P$ : C, 54.3; H, 5.7; N, 5.3; P, 5.8%.

### X-ray crystallography for 4b

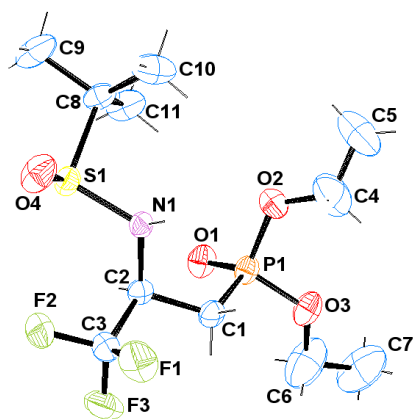

CCDC 876310

|                               |                                                                             |                             |                         |                              |            |
|-------------------------------|-----------------------------------------------------------------------------|-----------------------------|-------------------------|------------------------------|------------|
| <b>Acquisition Time (sec)</b> | 0.6630                                                                      | <b>Comment</b>              | opr.: Ivashchenko T. A. | <b>Date</b>                  | May 8 2012 |
| <b>File Name</b>              | D:\Nuts95\Data\Spectra-Aminophosphonates\Dimethyl methylphosphonate\P_67-1H |                             |                         | <b>Frequency (MHz)</b>       | 399.97     |
| <b>Nucleus</b>                | 1H                                                                          | <b>Number of Transients</b> | 1                       | <b>Original Points Count</b> | 9020       |
| <b>Pulse Sequence</b>         | s2pul                                                                       | <b>Solvent</b>              | CHLOROFORM-D            | <b>Points Count</b>          | 16384      |
| <b>Temperature (degree C)</b> | 20.000                                                                      |                             |                         | <b>Sweep Width (Hz)</b>      | 6802.72    |

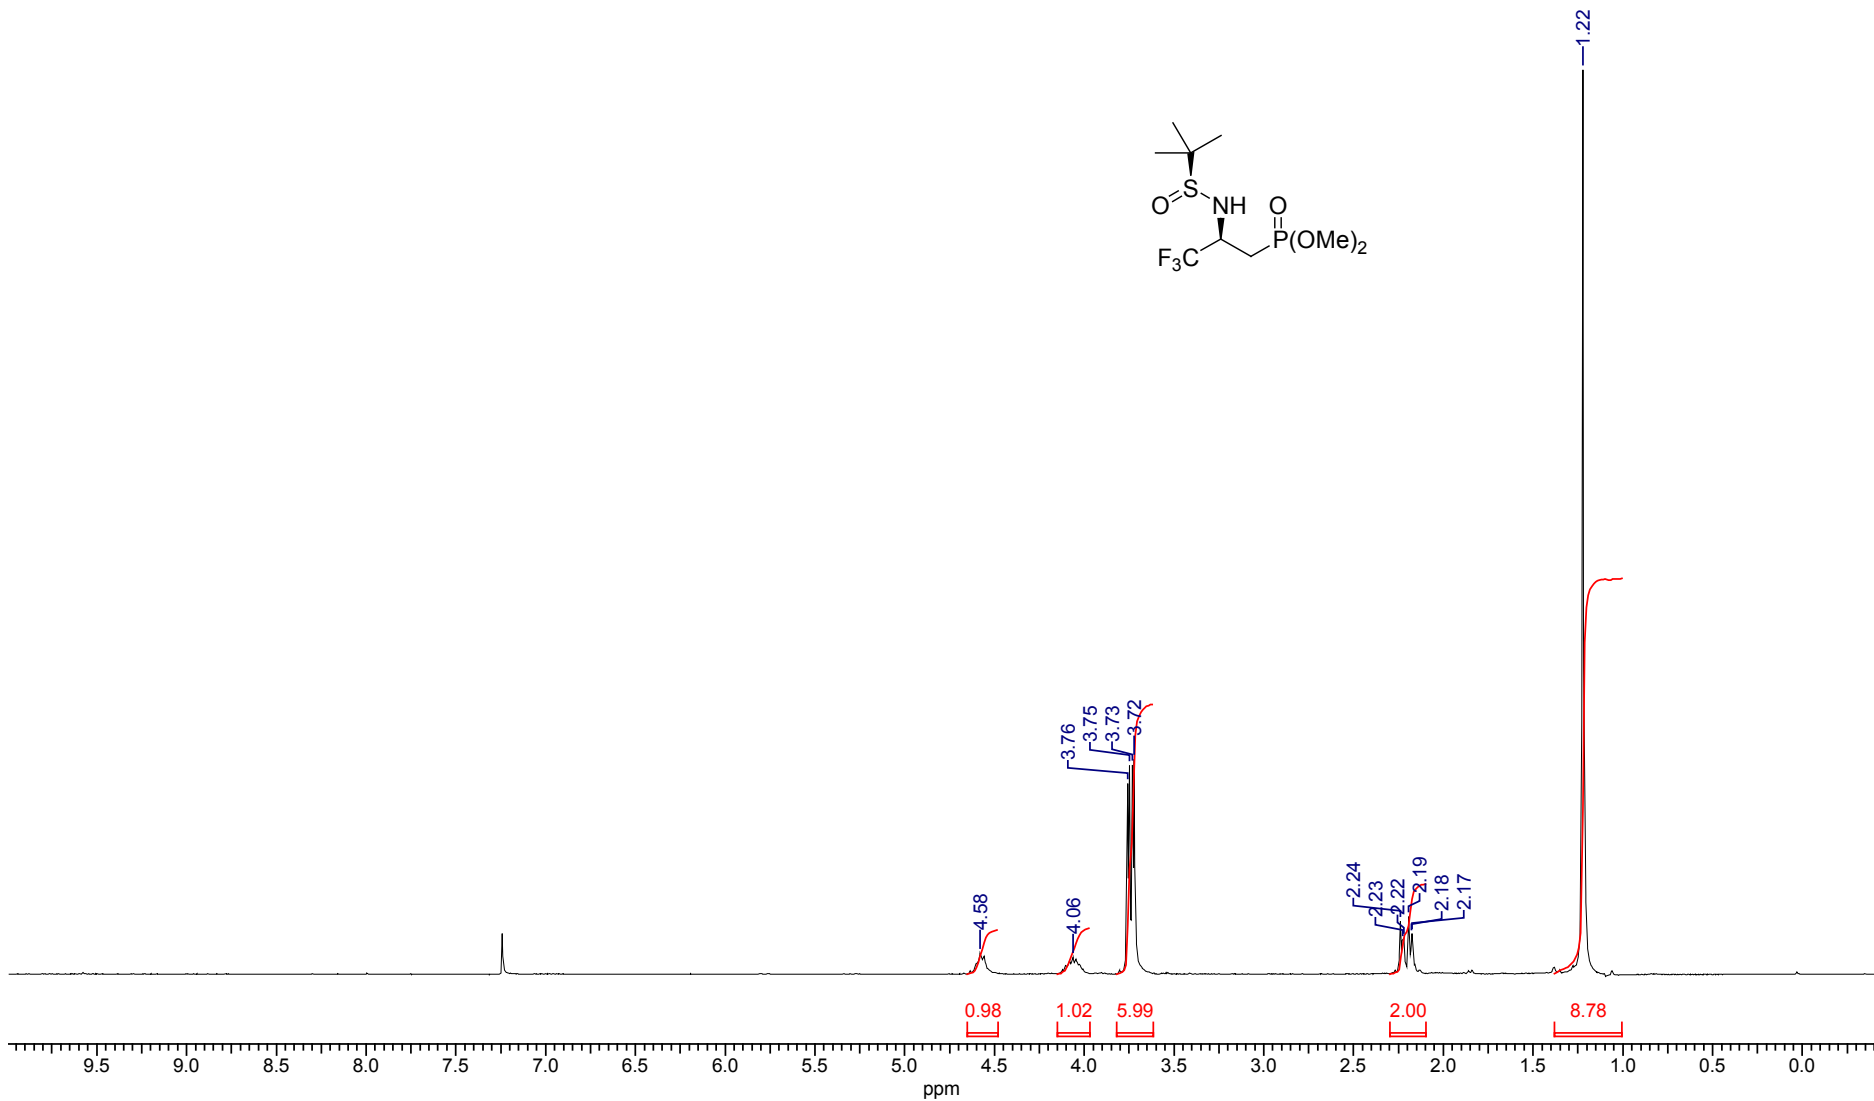



|                               |                                                                                           |                             |                         |                              |                        |                               |        |
|-------------------------------|-------------------------------------------------------------------------------------------|-----------------------------|-------------------------|------------------------------|------------------------|-------------------------------|--------|
| <b>Acquisition Time (sec)</b> | 0.6816                                                                                    | <b>Comment</b>              | 13C NMR Spectrum, CDCl3 |                              | <b>Date</b>            | 16 May 2012 09:33:52          |        |
| <b>File Name</b>              | D:\Nuts95\Data\Spectra-Aminophosphonates\Dimethyl methylphosphonate\P_68-13C\P_68-13C_fid |                             |                         |                              | <b>Frequency (MHz)</b> | 100.62                        |        |
| <b>Nucleus</b>                | 13C                                                                                       | <b>Number of Transients</b> | 444                     | <b>Original Points Count</b> | 32768                  | <b>Points Count</b>           | 32768  |
| <b>Pulse Sequence</b>         | zgpg30                                                                                    | <b>Solvent</b>              | CHLOROFORM-D            | <b>Sweep Width (Hz)</b>      | 24038.46               | <b>Temperature (degree C)</b> | 21.588 |

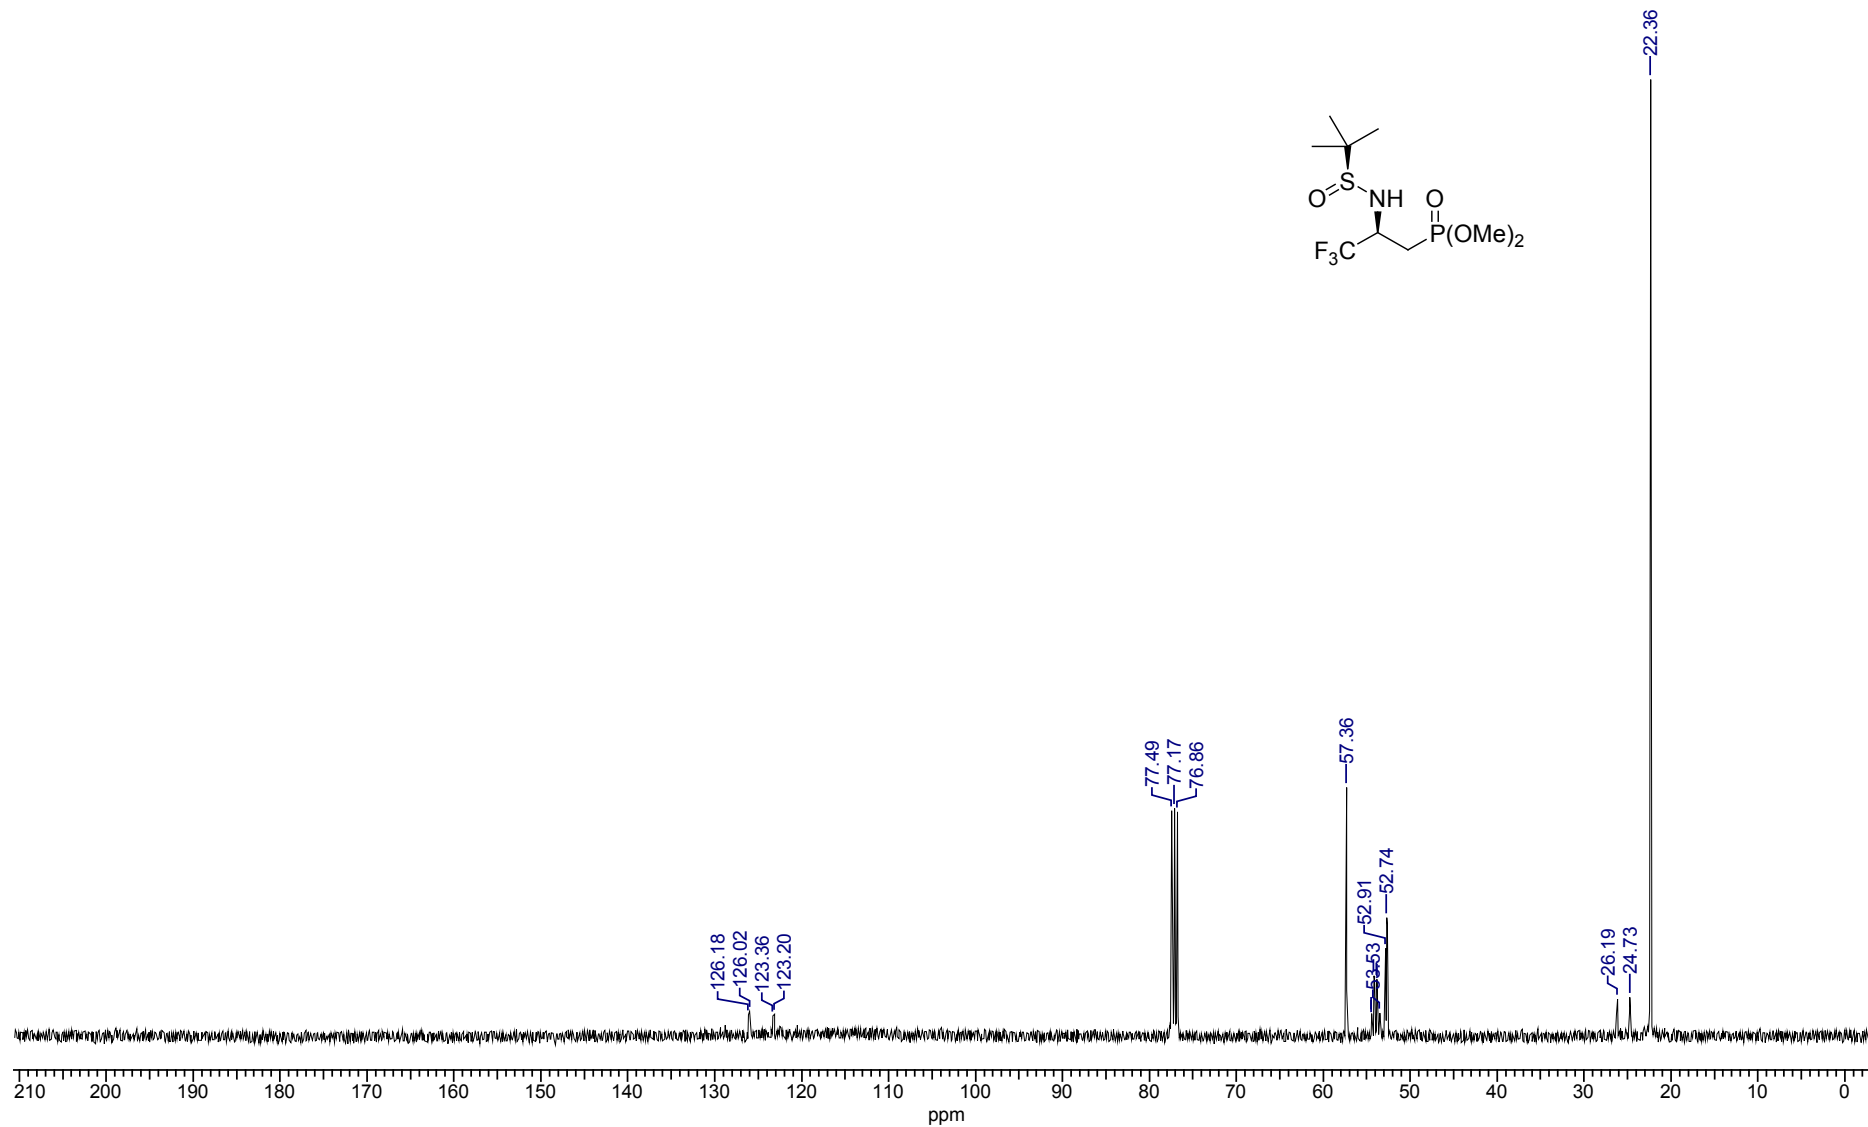

S10

|                               |          |                               |             |                             |                                                                              |                              |       |
|-------------------------------|----------|-------------------------------|-------------|-----------------------------|------------------------------------------------------------------------------|------------------------------|-------|
| <b>Acquisition Time (sec)</b> | 0.3400   | <b>Date</b>                   | May 10 2012 | <b>File Name</b>            | D:\Nuts95\Data\Spectra-Aminophosphonates\Dimethyl methylphosphonate\P_67-F19 |                              |       |
| <b>Frequency (MHz)</b>        | 376.29   | <b>Nucleus</b>                | 19F         | <b>Number of Transients</b> | 4                                                                            | <b>Original Points Count</b> | 64000 |
| <b>Points Count</b>           | 65536    | <b>Pulse Sequence</b>         | s2pul       | <b>Solvent</b>              | CHLOROFORM-D                                                                 |                              |       |
| <b>Sweep Width (Hz)</b>       | 94117.65 | <b>Temperature (degree C)</b> | 20.000      |                             |                                                                              |                              |       |

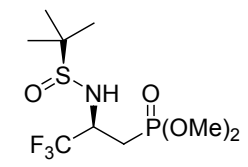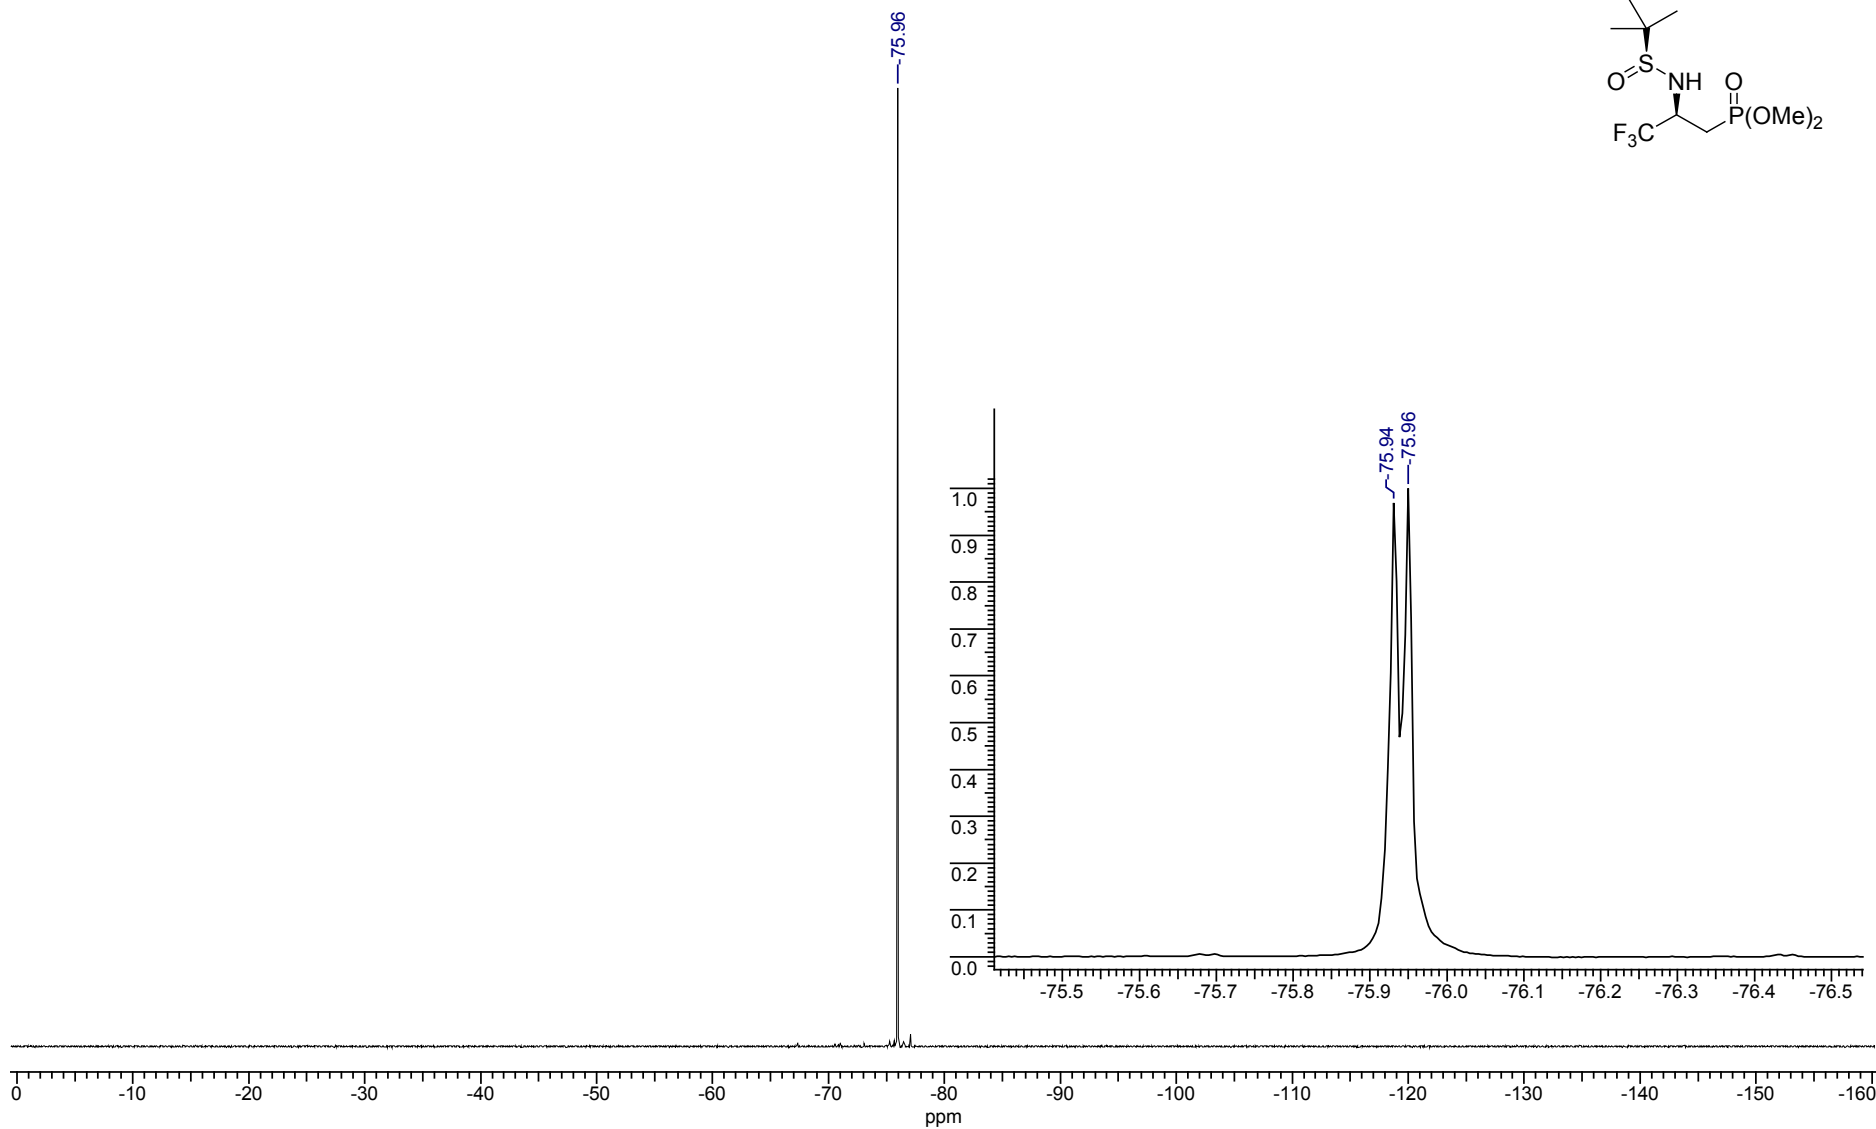

# S11

|                               |                                                                                                 |                             |                      |                              |                        |                      |       |
|-------------------------------|-------------------------------------------------------------------------------------------------|-----------------------------|----------------------|------------------------------|------------------------|----------------------|-------|
| <b>Acquisition Time (sec)</b> | 0.4063                                                                                          | <b>Comment</b>              | Imported from UXNMR. |                              | <b>Date</b>            | 10 May 2012 12:35:12 |       |
| <b>File Name</b>              | D:\Nuts95\Data\Spectra-Aminophosphonates\Dimethyl methylphosphonate\P_67-P31\P_67-P31_001000fid |                             |                      |                              | <b>Frequency (MHz)</b> | 202.44               |       |
| <b>Nucleus</b>                | 31P                                                                                             | <b>Number of Transients</b> | 12                   | <b>Original Points Count</b> | 65536                  | <b>Points Count</b>  | 65536 |
| <b>Pulse Sequence</b>         | zgpg                                                                                            | <b>Solvent</b>              | CHLOROFORM-D         | <b>Sweep Width (Hz)</b>      | 80645.16               |                      |       |

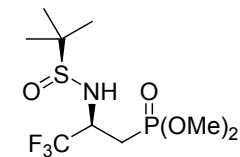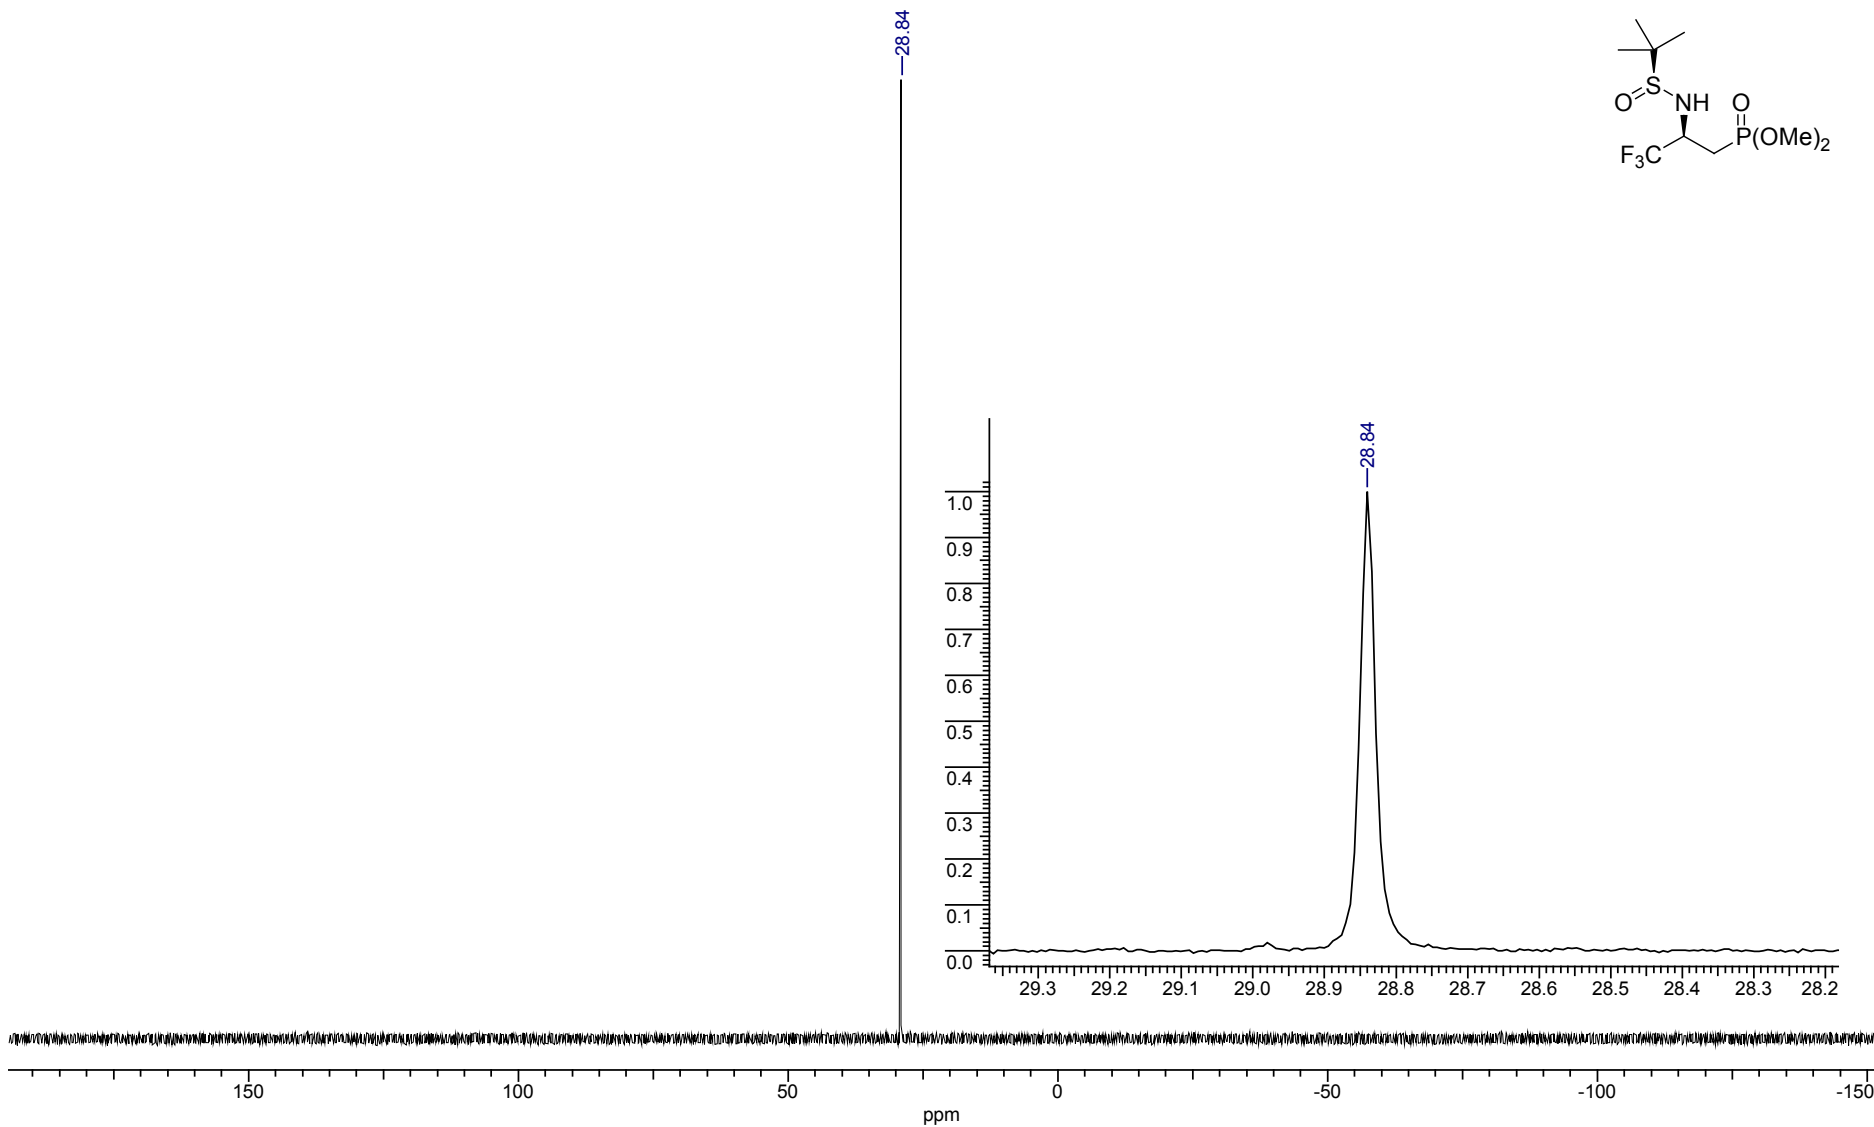

S12

13 Jun 2012

|                               |                                                                                        |                             |               |                              |                      |
|-------------------------------|----------------------------------------------------------------------------------------|-----------------------------|---------------|------------------------------|----------------------|
| <b>Acquisition Time (sec)</b> | 2.3962                                                                                 | <b>Comment</b>              | Turchenyuk N2 | <b>Date</b>                  | 21 Mar 2012 12:20:16 |
| <b>File Name</b>              | D:\Nuts95\Data\Spectra-Aminophosphonates\Diethyl methylphosphonate\P_41-1H\P_41-1H_fid |                             |               | <b>Frequency (MHz)</b>       | 400.13               |
| <b>Nucleus</b>                | 1H                                                                                     | <b>Number of Transients</b> | 8             | <b>Original Points Count</b> | 30720                |
| <b>Pulse Sequence</b>         | zg                                                                                     | <b>Solvent</b>              | CHLOROFORM-D  | <b>Points Count</b>          | 32768                |
|                               |                                                                                        |                             |               | <b>Sweep Width (Hz)</b>      | 6410.26              |

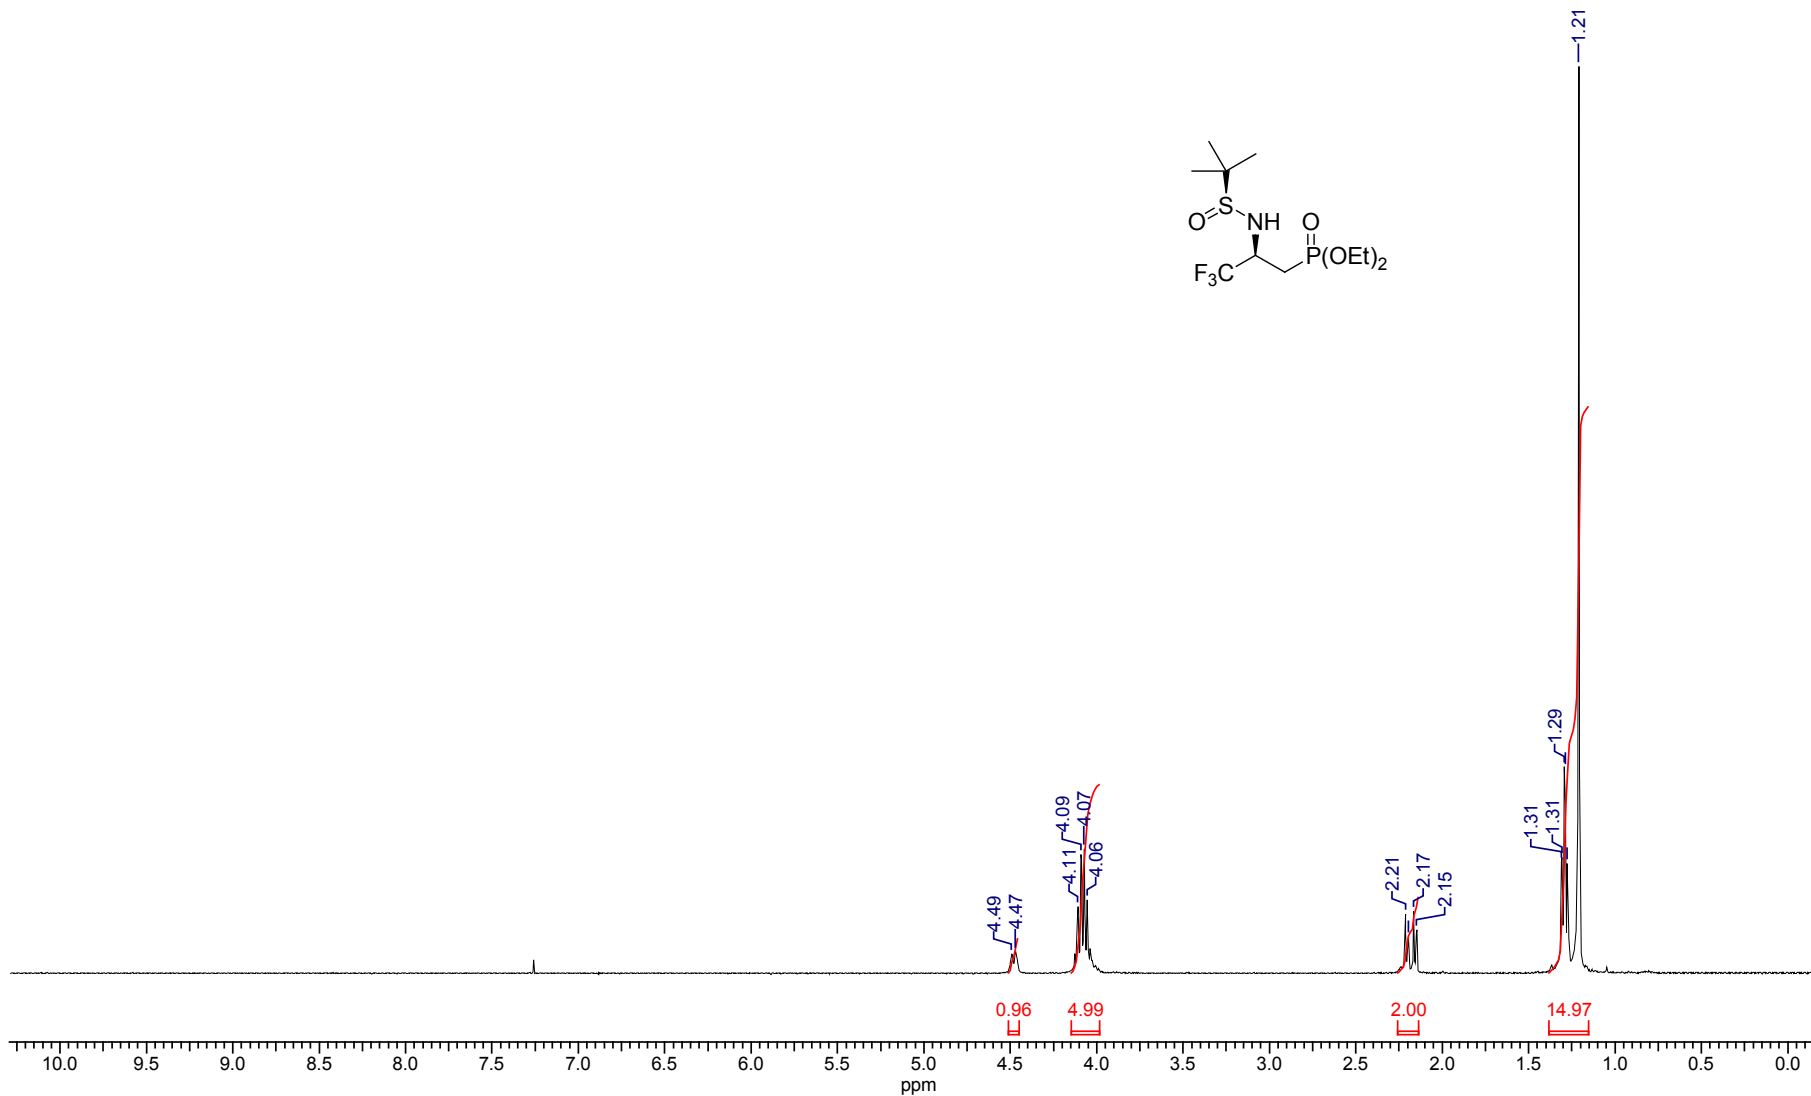

13 Jun 2012

|                               |                                   |                        |                         |                       |                      |                             |                |              |
|-------------------------------|-----------------------------------|------------------------|-------------------------|-----------------------|----------------------|-----------------------------|----------------|--------------|
| <b>Acquisition Time (sec)</b> | 0.6816                            | <b>Comment</b>         | 13C NMR Spectrum, CDCl3 | <b>Date</b>           | 21 Mar 2012 12:56:32 |                             |                |              |
| <b>File Name</b>              | D:\Nuts95\Data\AP\ap-4c\ap-4c_fid | <b>Frequency (MHz)</b> | 100.62                  | <b>Nucleus</b>        | 13C                  | <b>Number of Transients</b> | 338            |              |
| <b>Original Points Count</b>  | 32768                             | <b>Points Count</b>    | 32768                   | <b>Pulse Sequence</b> | zgpg30               |                             | <b>Solvent</b> | CHLOROFORM-D |
| <b>Sweep Width (Hz)</b>       | 24038.46                          |                        |                         |                       |                      |                             |                |              |

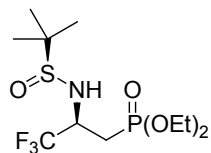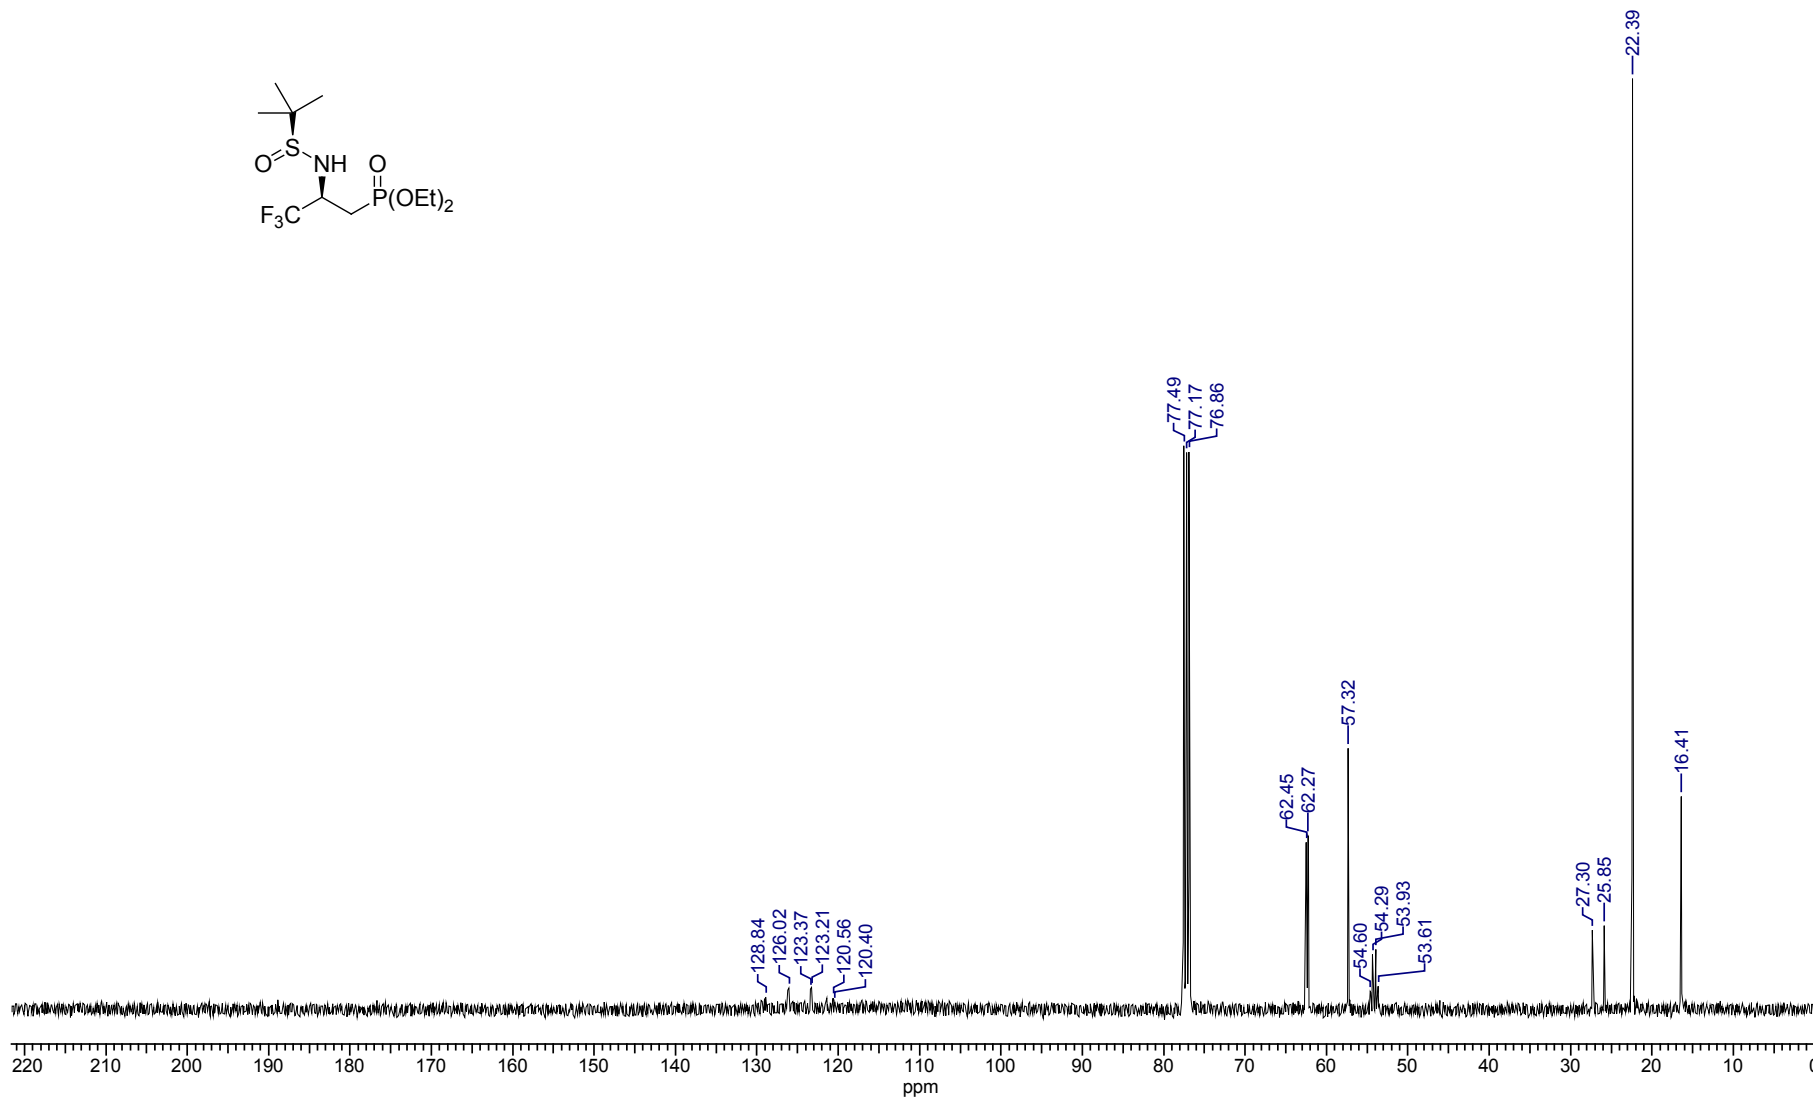

13 Jun 2012

|                               |        |                |              |                             |                                                                             |                              |                               |                     |       |
|-------------------------------|--------|----------------|--------------|-----------------------------|-----------------------------------------------------------------------------|------------------------------|-------------------------------|---------------------|-------|
| <b>Acquisition Time (sec)</b> | 0.3400 | <b>Date</b>    | Apr 10 2012  | <b>File Name</b>            | D:\Nuts95\Data\Spectra-Aminophosphonates\Diethyl methylphosphonate\P_53-F19 |                              |                               |                     |       |
| <b>Frequency (MHz)</b>        | 376.29 | <b>Nucleus</b> | 19F          | <b>Number of Transients</b> | 4                                                                           | <b>Original Points Count</b> | 64000                         | <b>Points Count</b> | 65536 |
| <b>Pulse Sequence</b>         | s2pul  | <b>Solvent</b> | CHLOROFORM-D | <b>Sweep Width (Hz)</b>     | 94117.65                                                                    |                              | <b>Temperature (degree C)</b> | 20.000              |       |

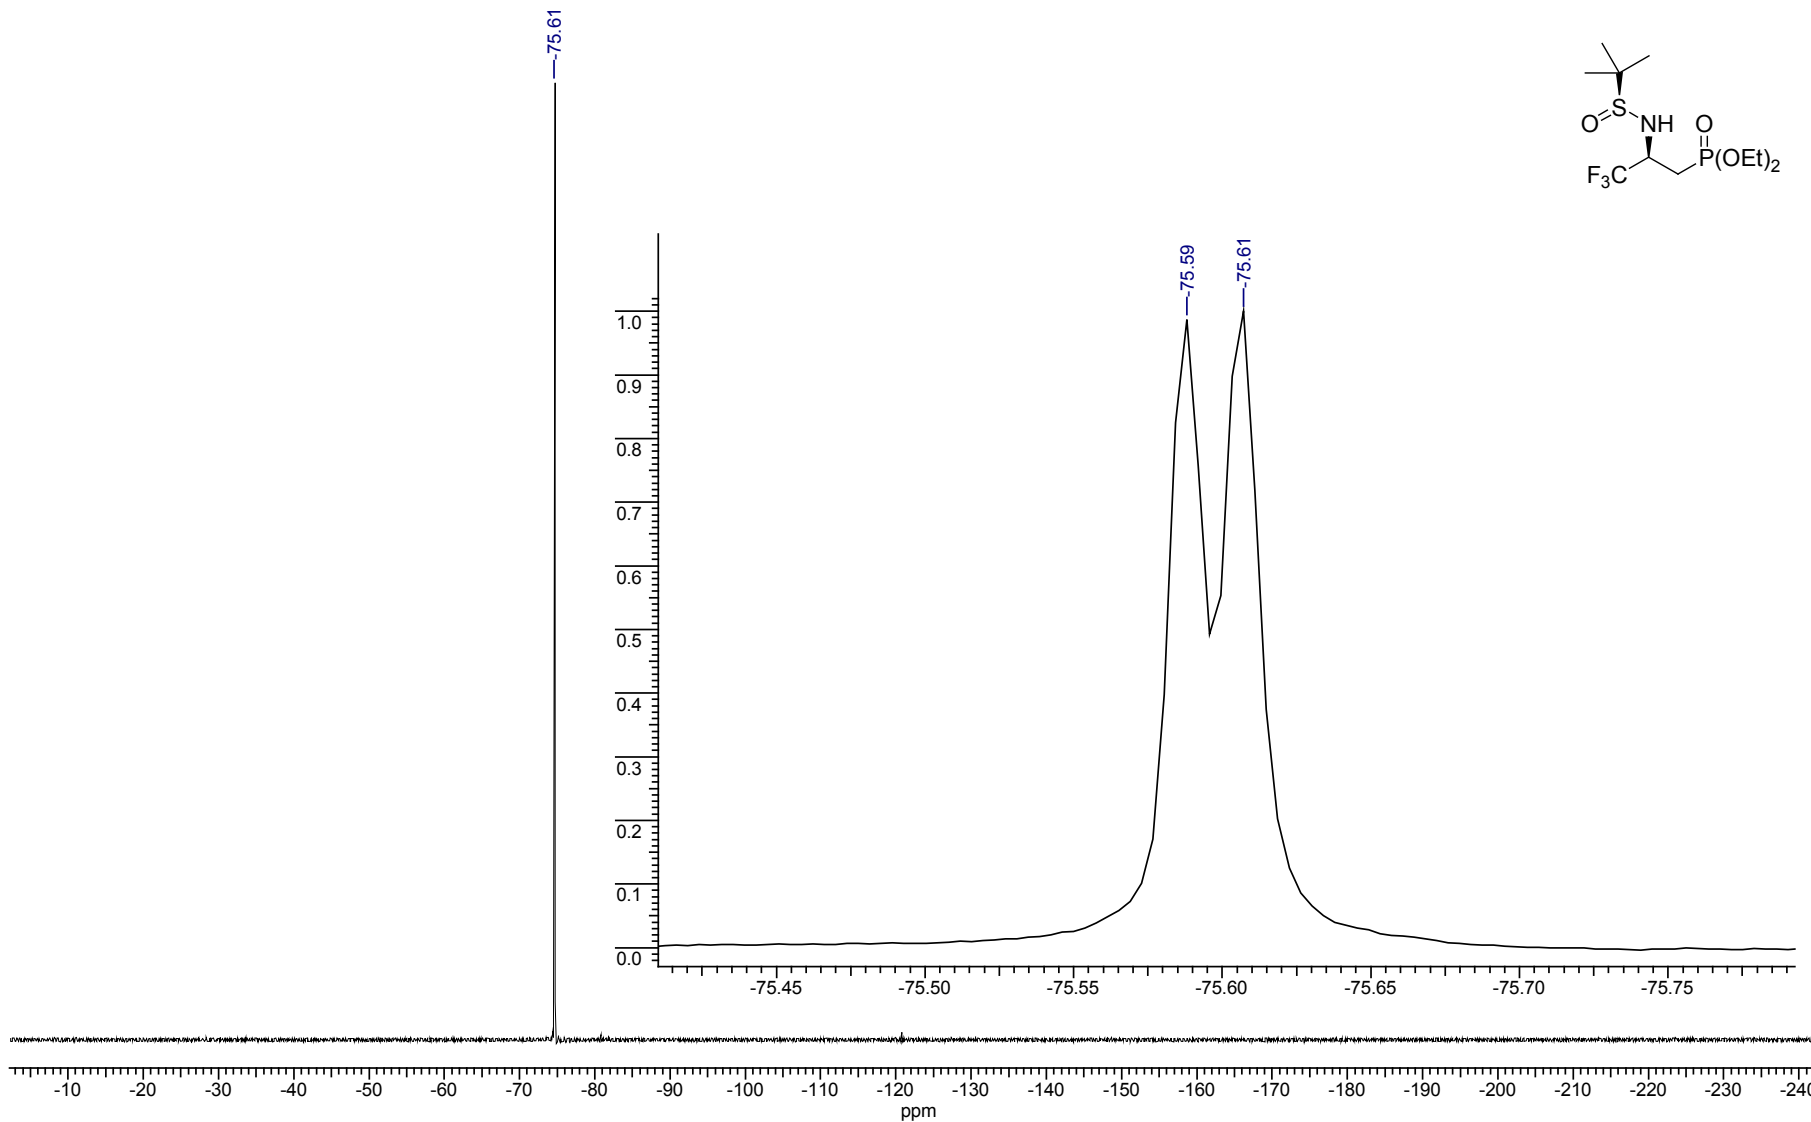

S15

13 Jun 2012

|                                      |                                      |                                                 |                                    |                           |
|--------------------------------------|--------------------------------------|-------------------------------------------------|------------------------------------|---------------------------|
| <b>Acquisition Time (sec)</b> 0.4063 | <b>Date</b> Tue Apr 03 08:12:47 2012 | <b>File Name</b> D:\Nuts95\Data\AP\ap-4p(H).nmr |                                    |                           |
| <b>Frequency (MHz)</b> 202.44        | <b>Nucleus</b> 31P                   | <b>Number of Transients</b> 9                   | <b>Original Points Count</b> 65536 | <b>Points Count</b> 65536 |
| <b>Sweep Width (Hz)</b> 80645.16     | <b>Solvent</b> CDCl3                 |                                                 |                                    |                           |

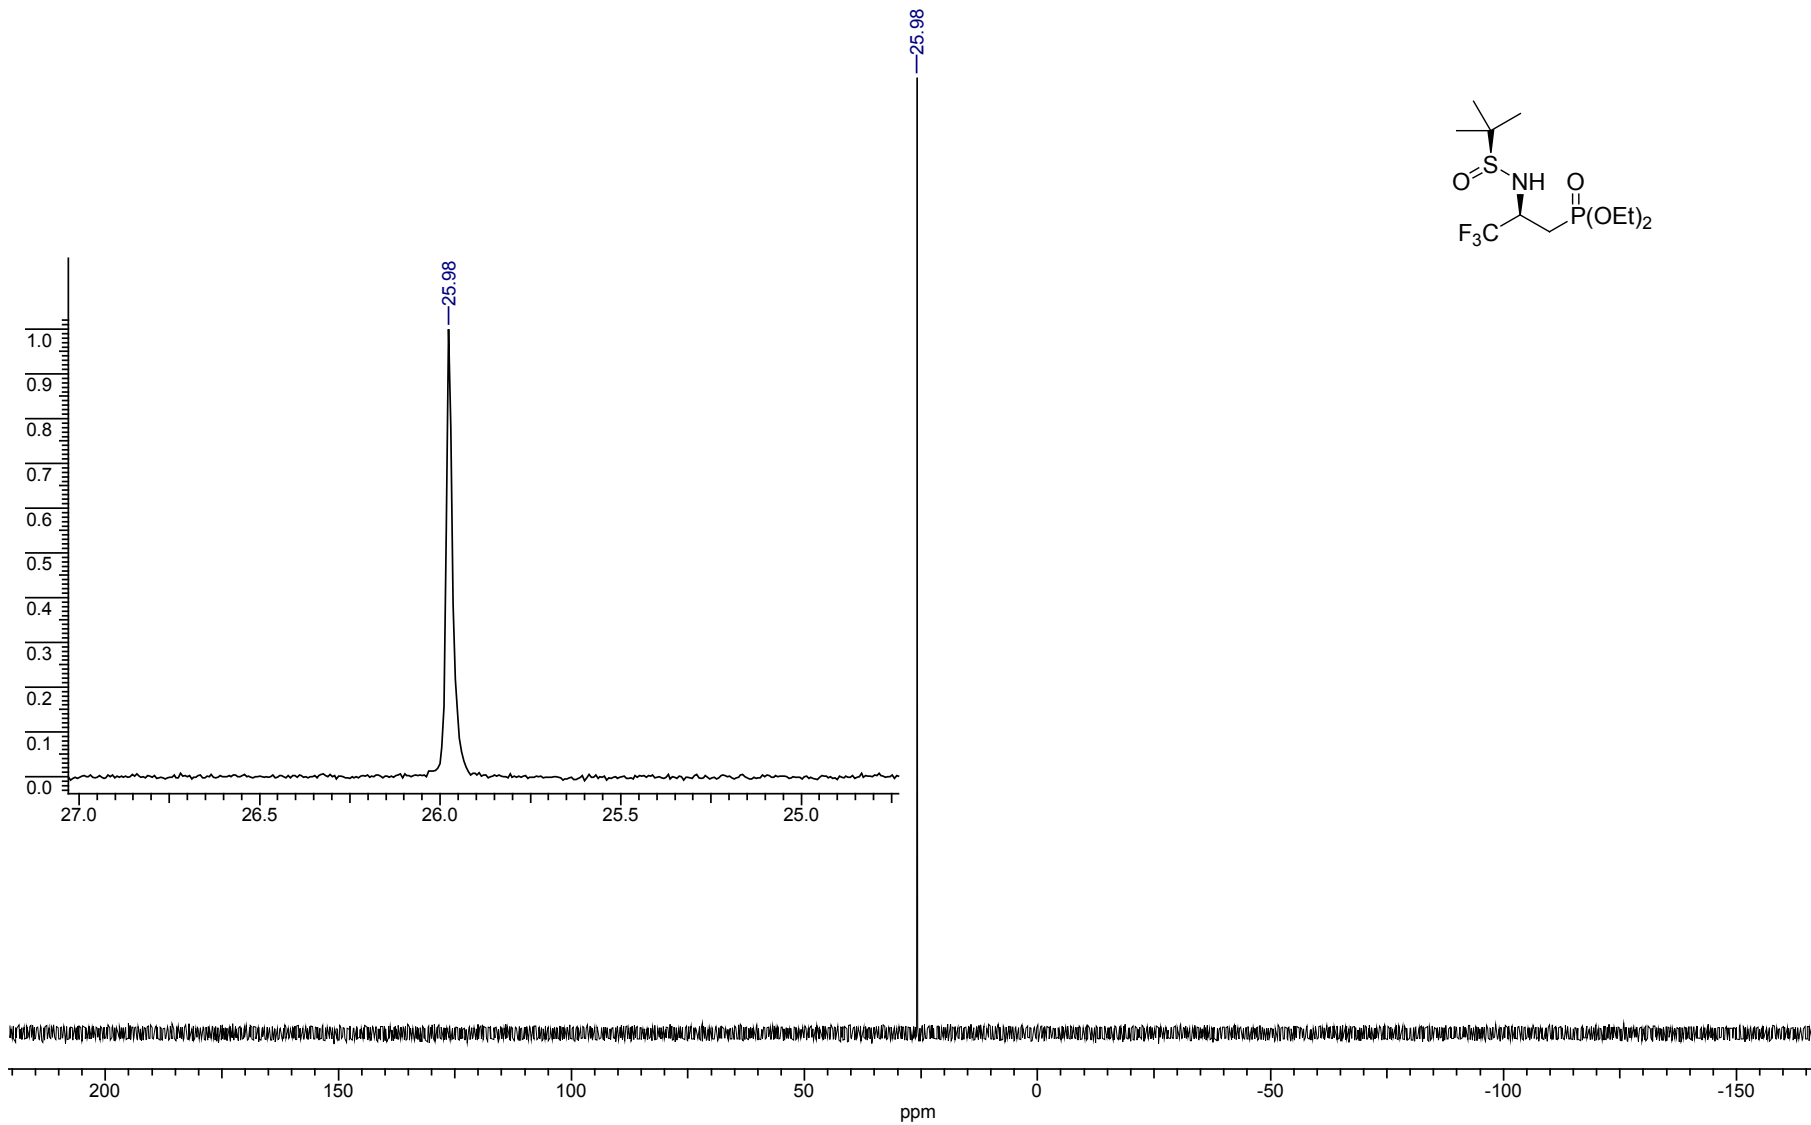

S16

|                               |                                                                                              |                             |                      |                              |                      |
|-------------------------------|----------------------------------------------------------------------------------------------|-----------------------------|----------------------|------------------------------|----------------------|
| <b>Acquisition Time (sec)</b> | 0.9634                                                                                       | <b>Comment</b>              | Imported from UXMNR. | <b>Date</b>                  | 08 Jun 2012 14:19:44 |
| <b>File Name</b>              | D:\Nuts95\Data\Spectra-Aminophosphonates\Dipropylmethylphosphonate\P_85-1H\P_85-1H_001000fid |                             |                      | <b>Frequency (MHz)</b>       | 500.07               |
| <b>Nucleus</b>                | 1H                                                                                           | <b>Number of Transients</b> | 1                    | <b>Original Points Count</b> | 16384                |
| <b>Pulse Sequence</b>         | zg                                                                                           | <b>Solvent</b>              | CHLOROFORM-D         | <b>Sweep Width (Hz)</b>      | 8503.40              |

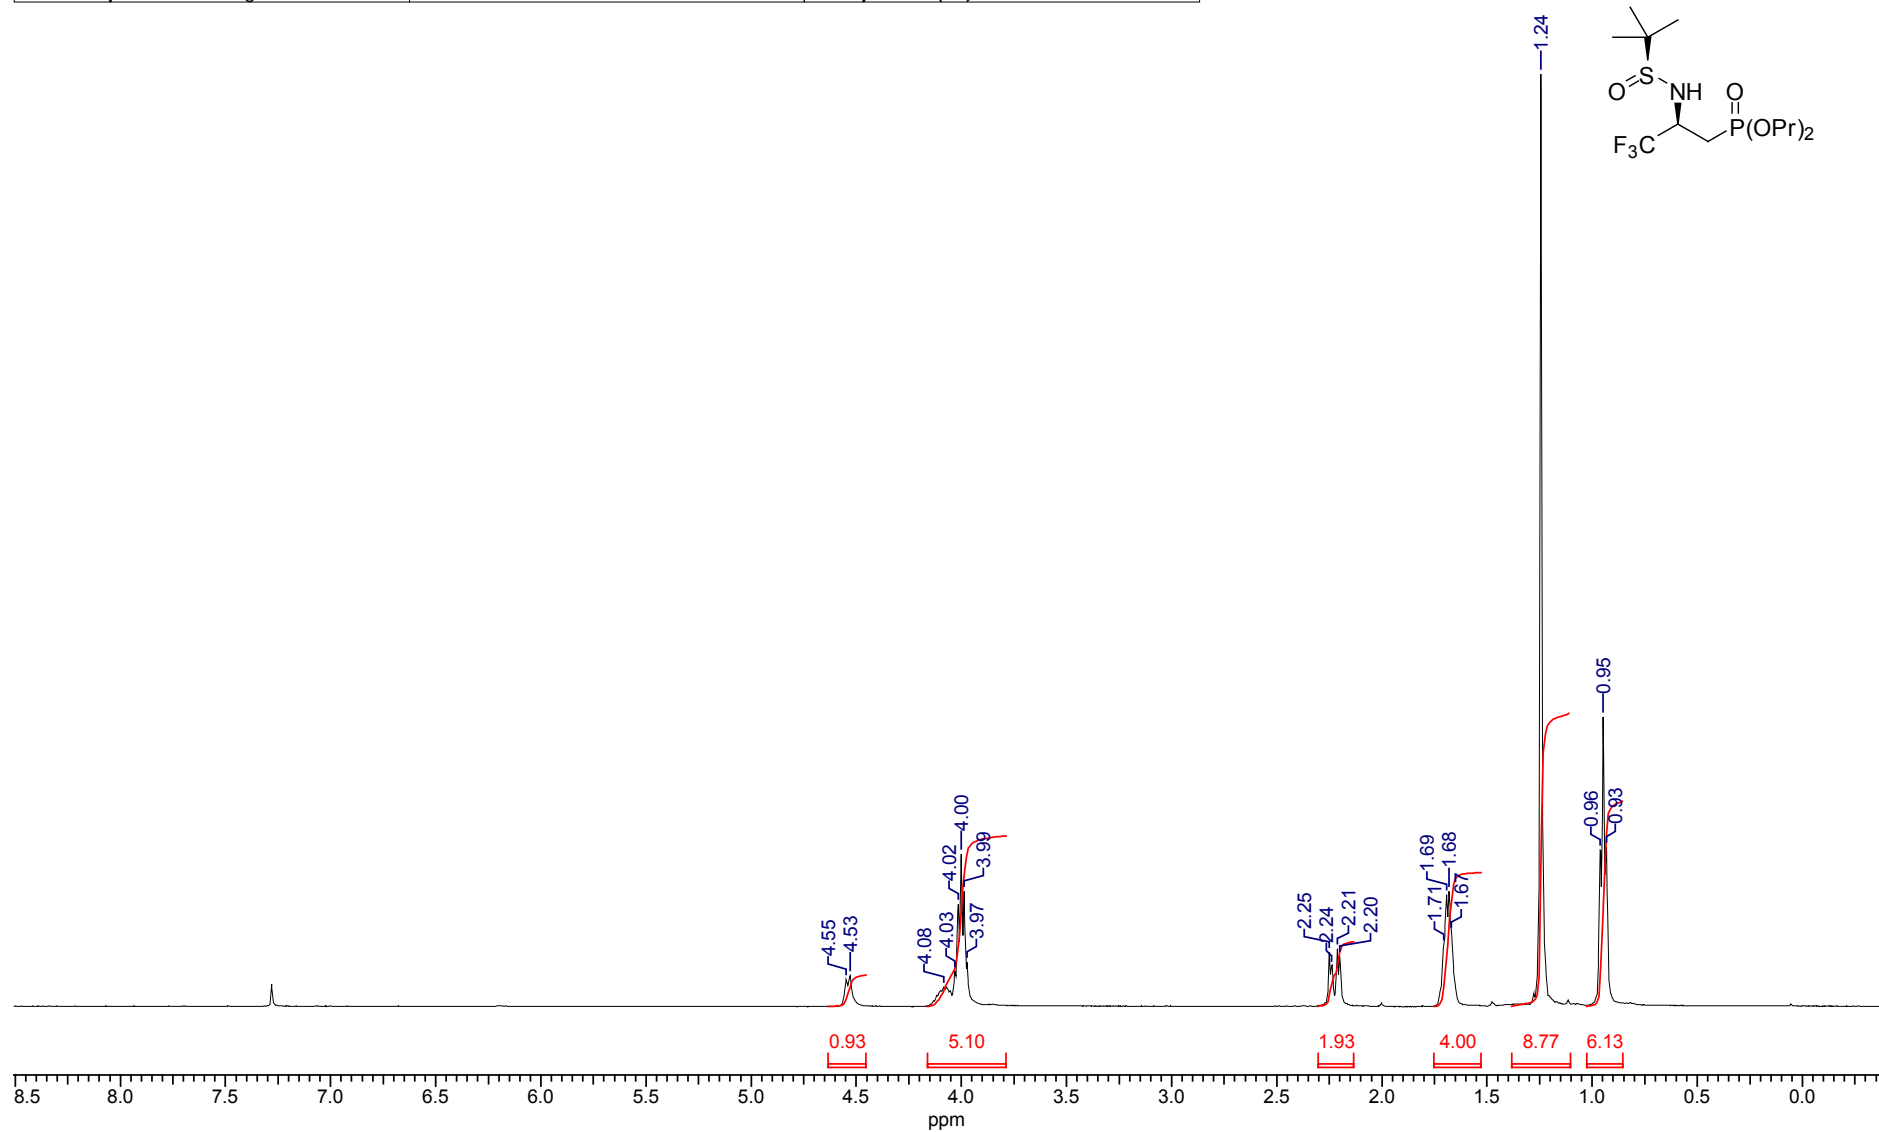



S17

|                               |                                                                                                |                             |                      |                              |                        |                      |       |
|-------------------------------|------------------------------------------------------------------------------------------------|-----------------------------|----------------------|------------------------------|------------------------|----------------------|-------|
| <b>Acquisition Time (sec)</b> | 0.7834                                                                                         | <b>Comment</b>              | Imported from UXNMR. |                              | <b>Date</b>            | 08 Jun 2012 19:54:40 |       |
| <b>File Name</b>              | D:\Nuts95\Data\Spectra-Aminophosphonates\Dipropylmethylphosphonate\P_85-C13\P_85-C13_001000fid |                             |                      |                              | <b>Frequency (MHz)</b> | 125.76               |       |
| <b>Nucleus</b>                | <sup>13</sup> C                                                                                | <b>Number of Transients</b> | 553                  | <b>Original Points Count</b> | 51200                  | <b>Points Count</b>  | 65536 |
| <b>Pulse Sequence</b>         | zgpg                                                                                           | <b>Solvent</b>              | DMSO-D6              | <b>Sweep Width (Hz)</b>      | 32679.74               |                      |       |

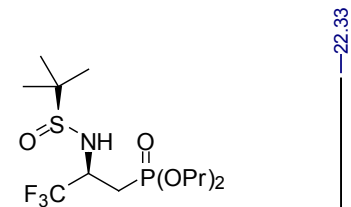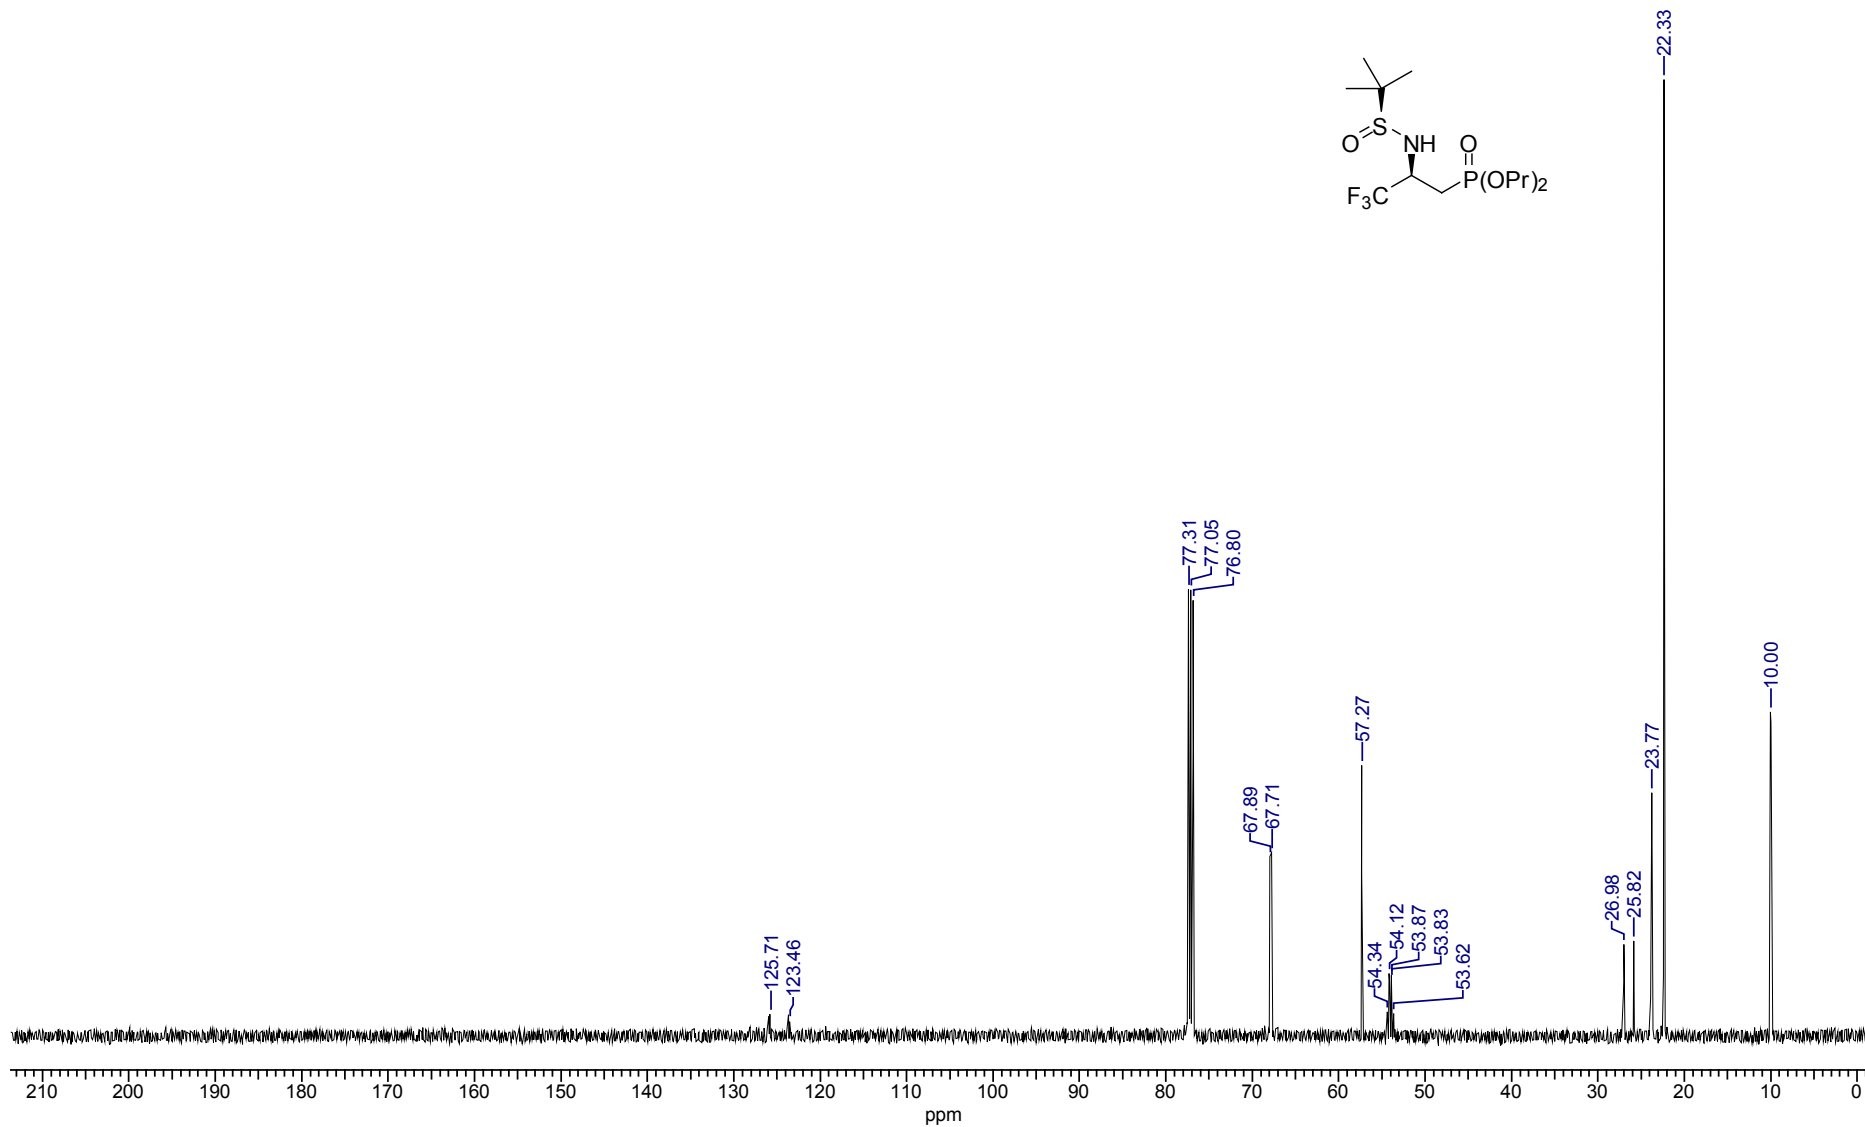

S18

|                               |          |                               |             |                             |                                                                             |                              |       |
|-------------------------------|----------|-------------------------------|-------------|-----------------------------|-----------------------------------------------------------------------------|------------------------------|-------|
| <b>Acquisition Time (sec)</b> | 0.3400   | <b>Date</b>                   | Jun 12 2012 | <b>File Name</b>            | D:\Nuts95\Data\Spectra-Aminophosphonates\Dipropylmethylphosphonate\P_85-F19 |                              |       |
| <b>Frequency (MHz)</b>        | 376.29   | <b>Nucleus</b>                | 19F         | <b>Number of Transients</b> | 4                                                                           | <b>Original Points Count</b> | 64000 |
| <b>Points Count</b>           | 65536    | <b>Pulse Sequence</b>         | s2pul       | <b>Solvent</b>              | CHLOROFORM-D                                                                |                              |       |
| <b>Sweep Width (Hz)</b>       | 94117.65 | <b>Temperature (degree C)</b> | 20.000      |                             |                                                                             |                              |       |

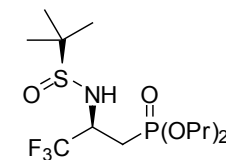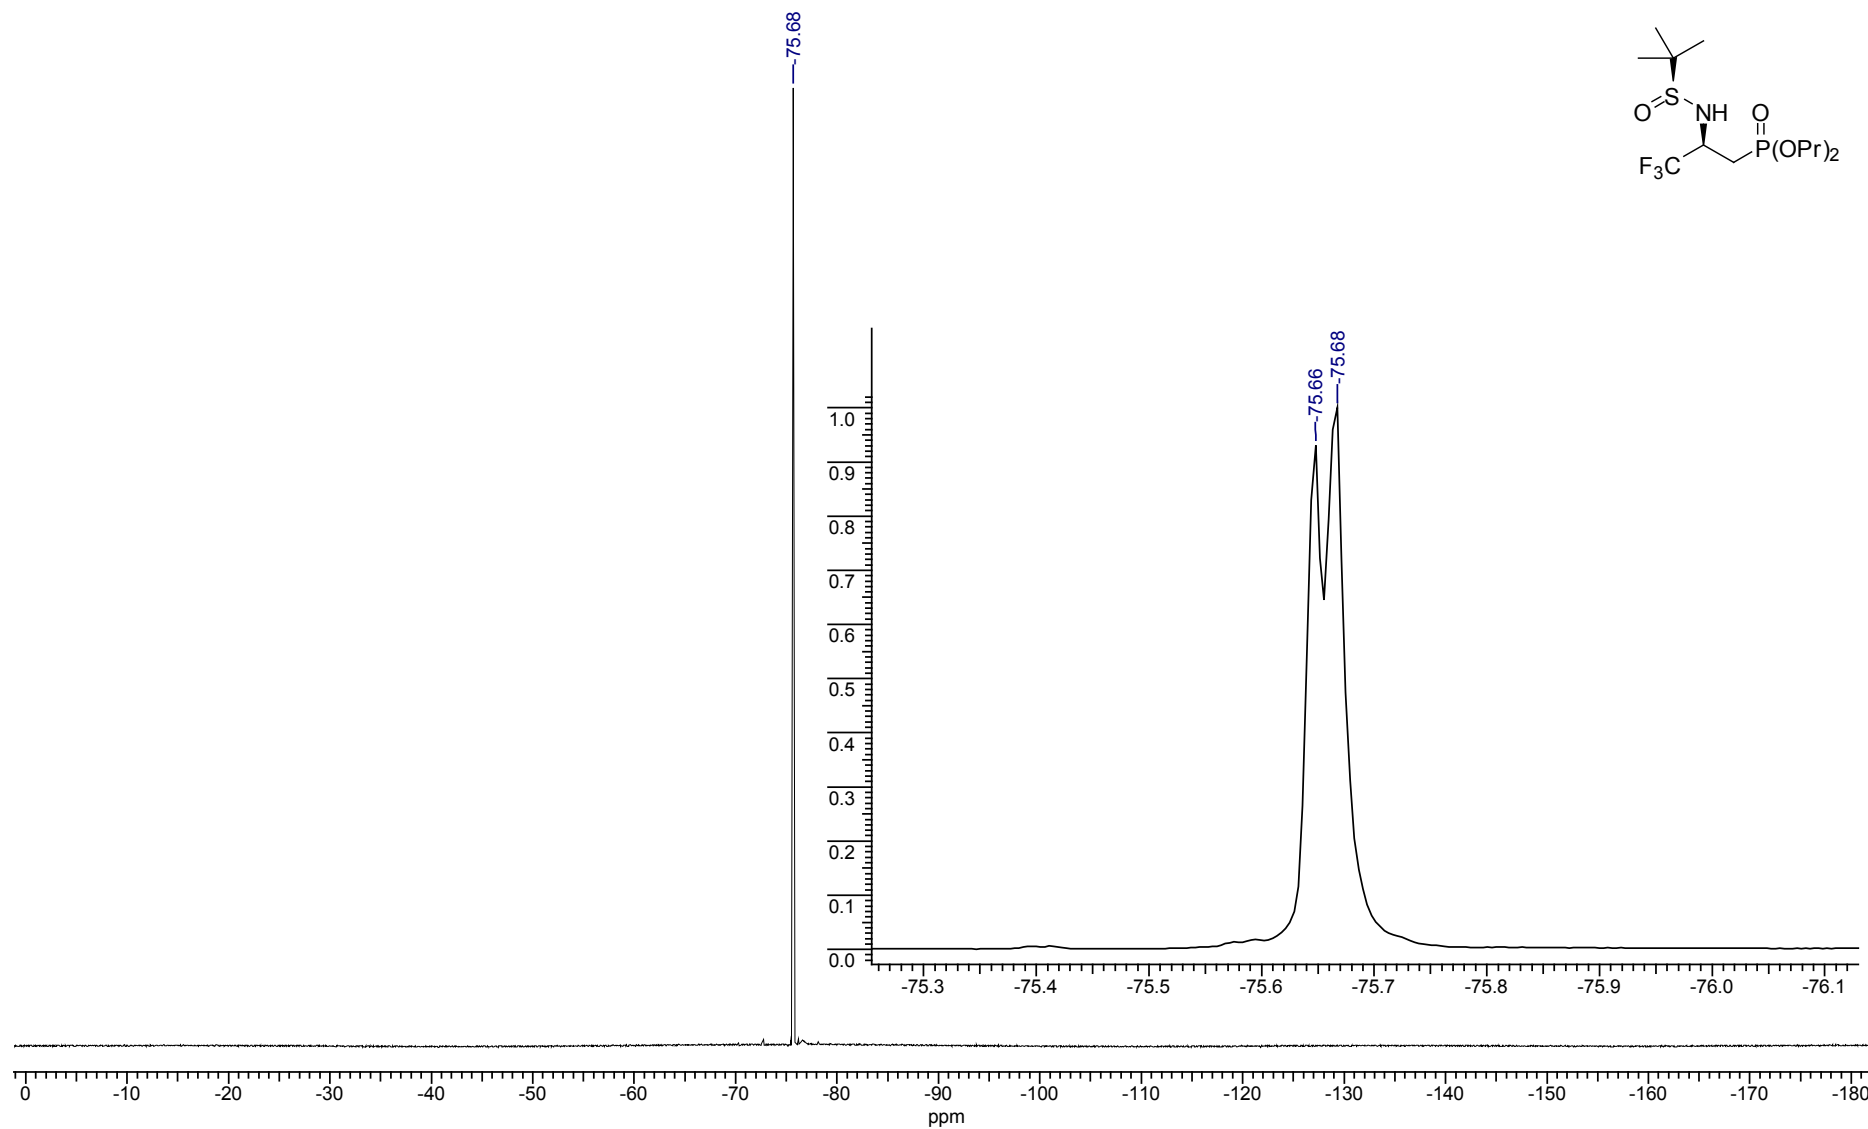

S19

|                               |                                                                                                      |                             |                      |                              |             |                      |       |
|-------------------------------|------------------------------------------------------------------------------------------------------|-----------------------------|----------------------|------------------------------|-------------|----------------------|-------|
| <b>Acquisition Time (sec)</b> | 0.4063                                                                                               | <b>Comment</b>              | Imported from UXMNR. |                              | <b>Date</b> | 23 Jul 2012 11:35:28 |       |
| <b>File Name</b>              | D:\Nuts95\Data\Spectra-Aminophosphonates\Dipropylmethylphosphonate\IGp-101-P31\IGp-101-P31_001000fid |                             |                      | <b>Frequency (MHz)</b>       | 202.44      |                      |       |
| <b>Nucleus</b>                | 31P                                                                                                  | <b>Number of Transients</b> | 12                   | <b>Original Points Count</b> | 65536       | <b>Points Count</b>  | 65536 |
| <b>Pulse Sequence</b>         | zgpg                                                                                                 | <b>Solvent</b>              | CHLOROFORM-D         | <b>Sweep Width (Hz)</b>      | 80645.16    |                      |       |

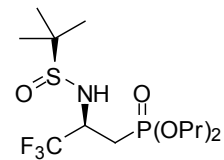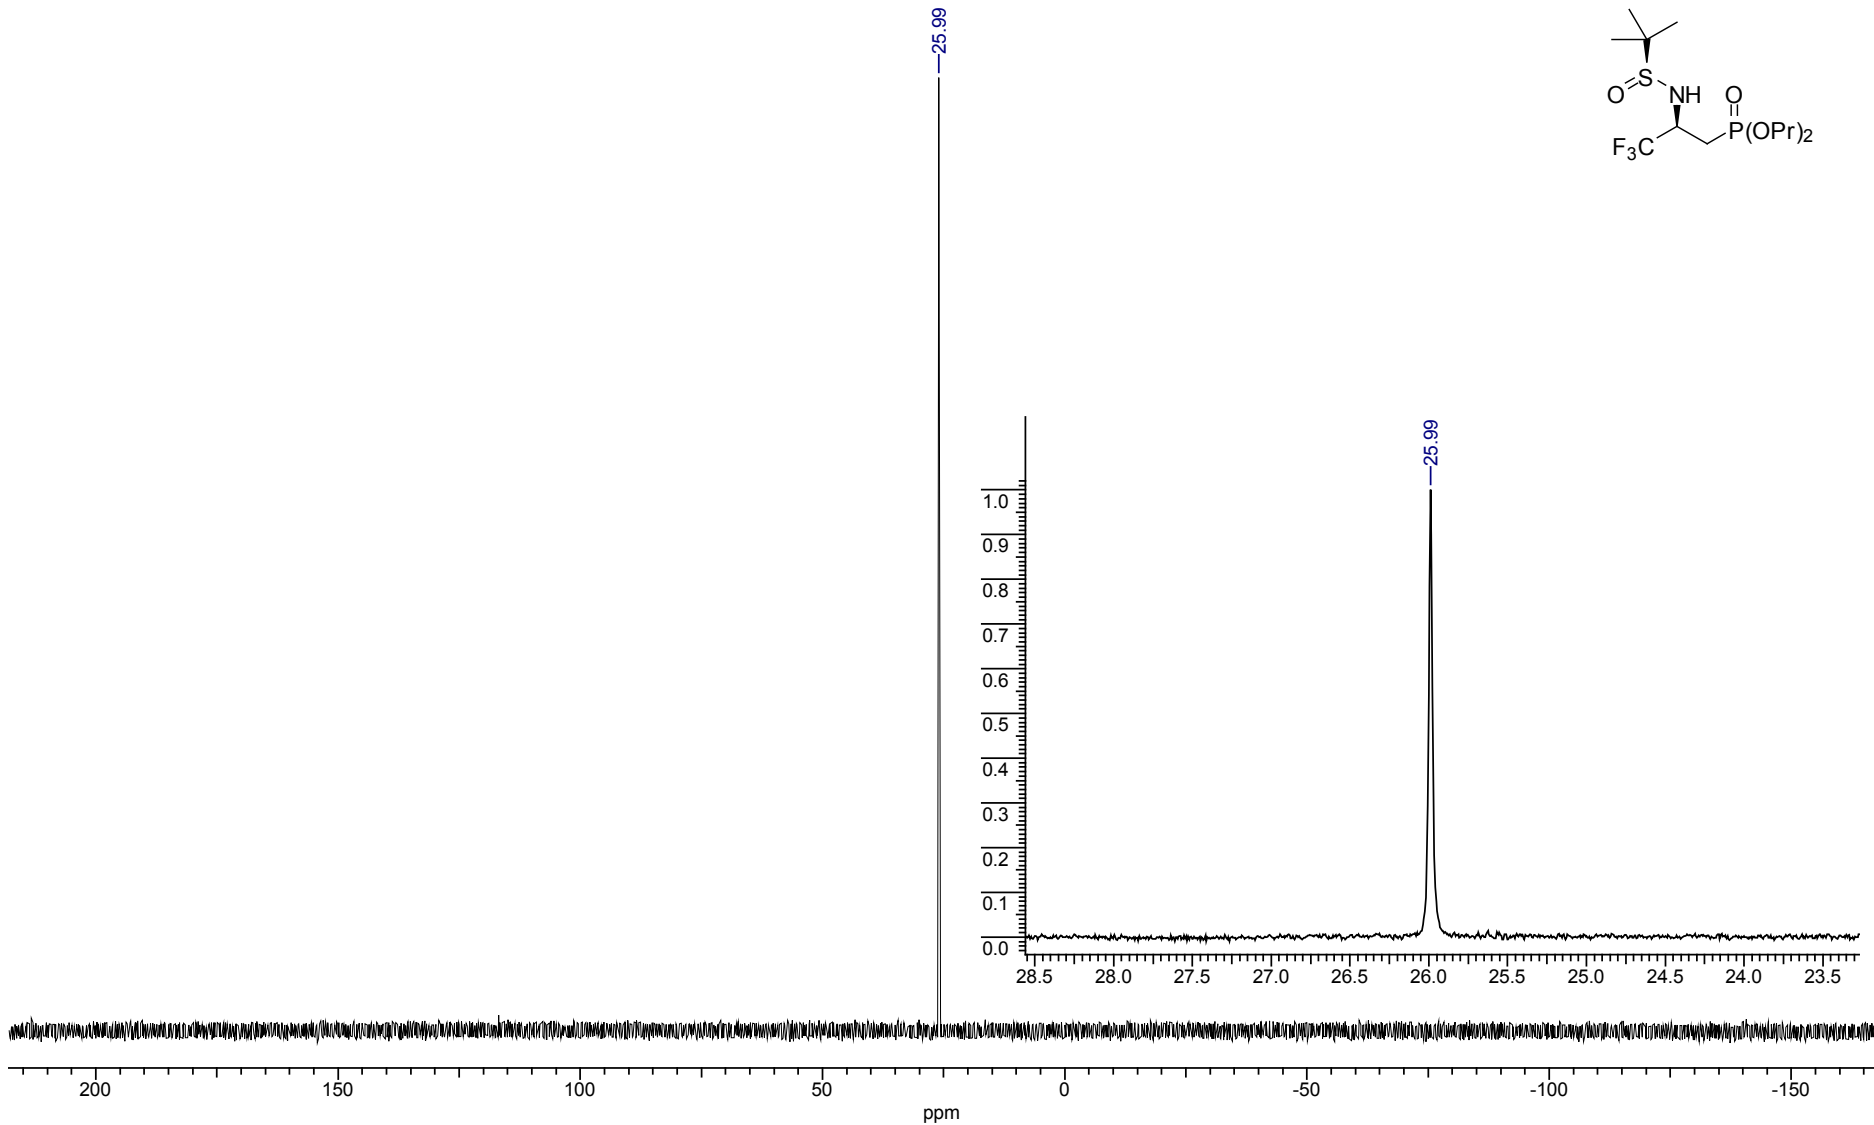

S20

|                               |                                                                                  |                             |                |                              |                      |                     |       |
|-------------------------------|----------------------------------------------------------------------------------|-----------------------------|----------------|------------------------------|----------------------|---------------------|-------|
| <b>Acquisition Time (sec)</b> | 2.3962                                                                           | <b>Comment</b>              | Turchenyuk, N1 | <b>Date</b>                  | 11 Apr 2012 10:27:12 |                     |       |
| <b>File Name</b>              | D:\Nuts95\Data\Spectra-Aminophosphonates\Diisopropyl methylphosphonate\1H\1H_fid |                             |                | <b>Frequency (MHz)</b>       | 400.13               |                     |       |
| <b>Nucleus</b>                | 1H                                                                               | <b>Number of Transients</b> | 8              | <b>Original Points Count</b> | 30720                | <b>Points Count</b> | 32768 |
| <b>Pulse Sequence</b>         | zg                                                                               | <b>Solvent</b>              | CHLOROFORM-D   | <b>Sweep Width (Hz)</b>      | 6410.26              |                     |       |
| <b>Temperature (degree C)</b> | 18.177                                                                           |                             |                |                              |                      |                     |       |

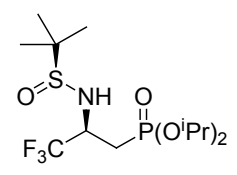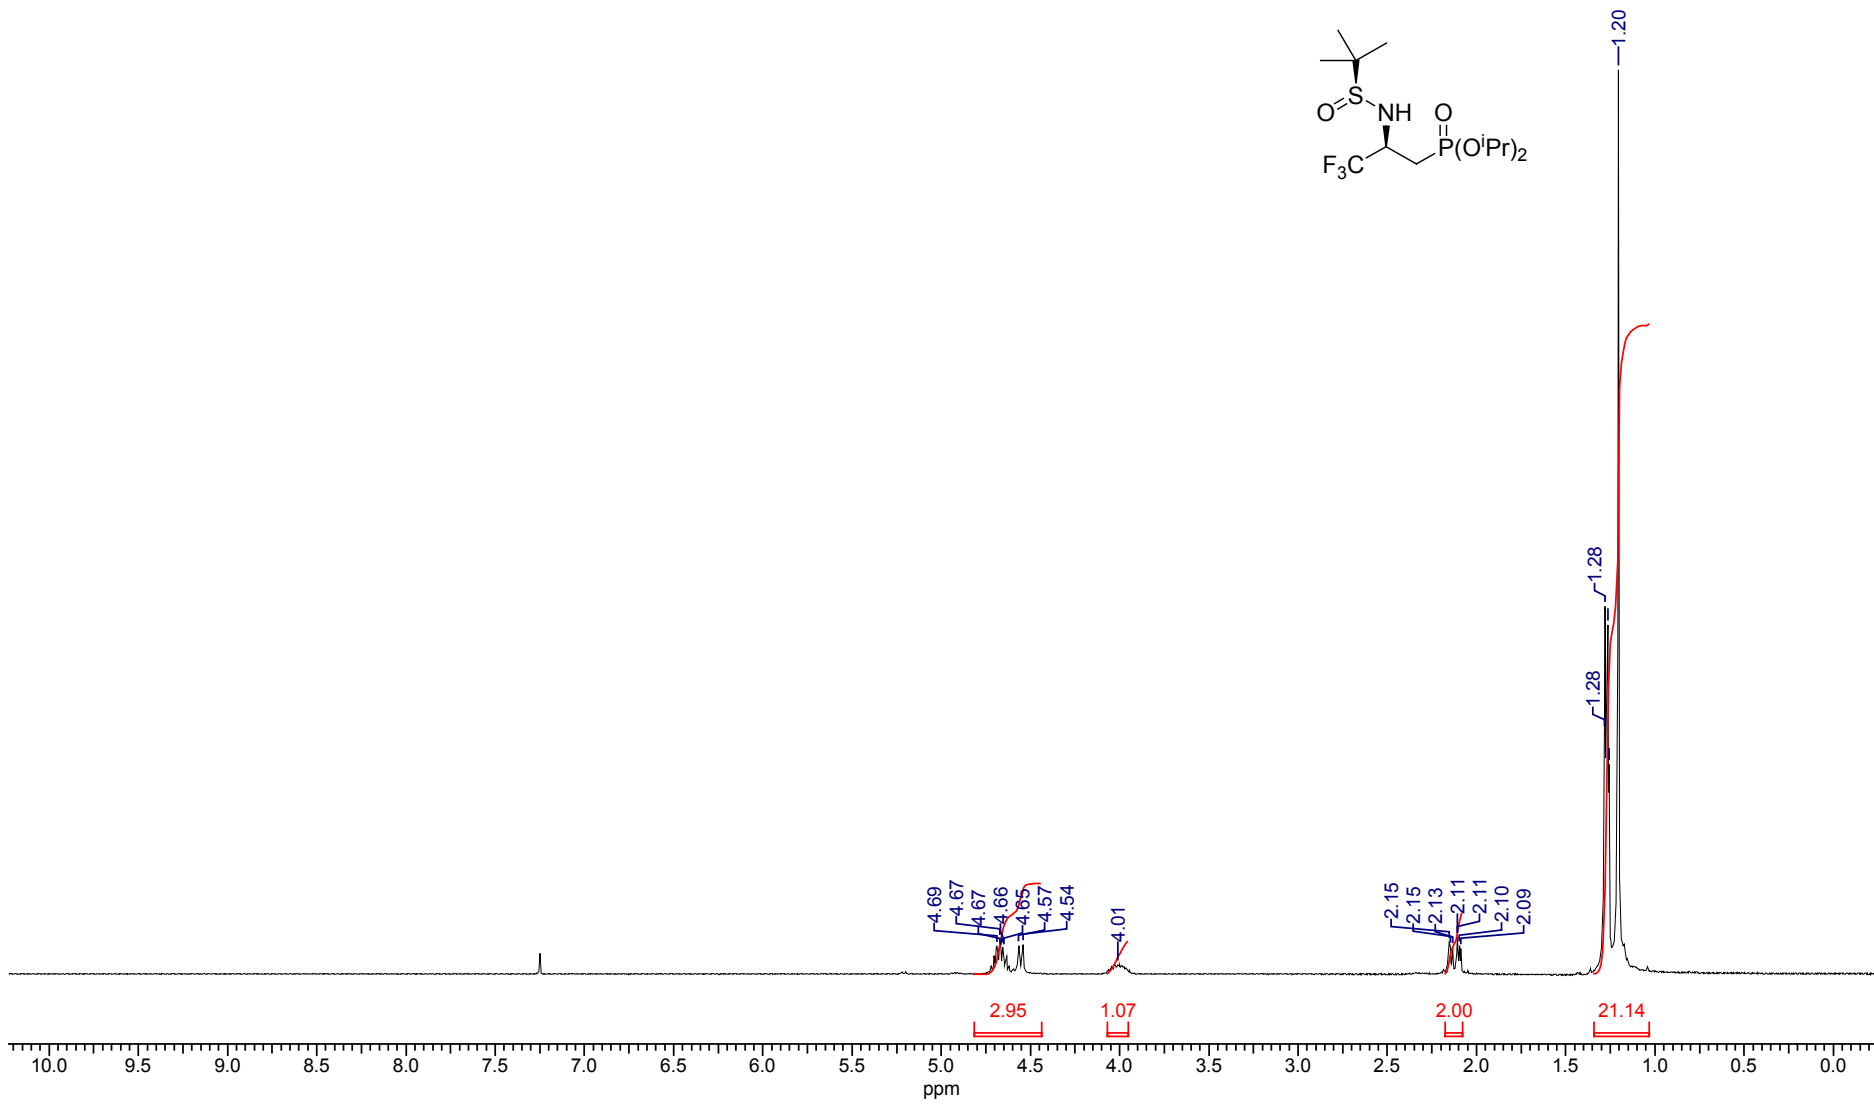

S21

|                               |                                                                                    |                             |                         |                              |                         |                      |       |
|-------------------------------|------------------------------------------------------------------------------------|-----------------------------|-------------------------|------------------------------|-------------------------|----------------------|-------|
| <b>Acquisition Time (sec)</b> | 0.6816                                                                             | <b>Comment</b>              | 13C NMR Spectrum, CDCl3 |                              | <b>Date</b>             | 11 Apr 2012 11:14:08 |       |
| <b>File Name</b>              | D:\Nuts95\Data\Spectra-Aminophosphonates\Diisopropyl methylphosphonate\13C\13C_fid |                             |                         | <b>Frequency (MHz)</b>       | 100.62                  |                      |       |
| <b>Nucleus</b>                | 13C                                                                                | <b>Number of Transients</b> | 428                     | <b>Original Points Count</b> | 32768                   | <b>Points Count</b>  | 32768 |
| <b>Pulse Sequence</b>         | zgpg30                                                                             | <b>Solvent</b>              | CHLOROFORM-D            |                              | <b>Sweep Width (Hz)</b> | 24038.46             |       |
| <b>Temperature (degree C)</b> | 18.412                                                                             |                             |                         |                              |                         |                      |       |

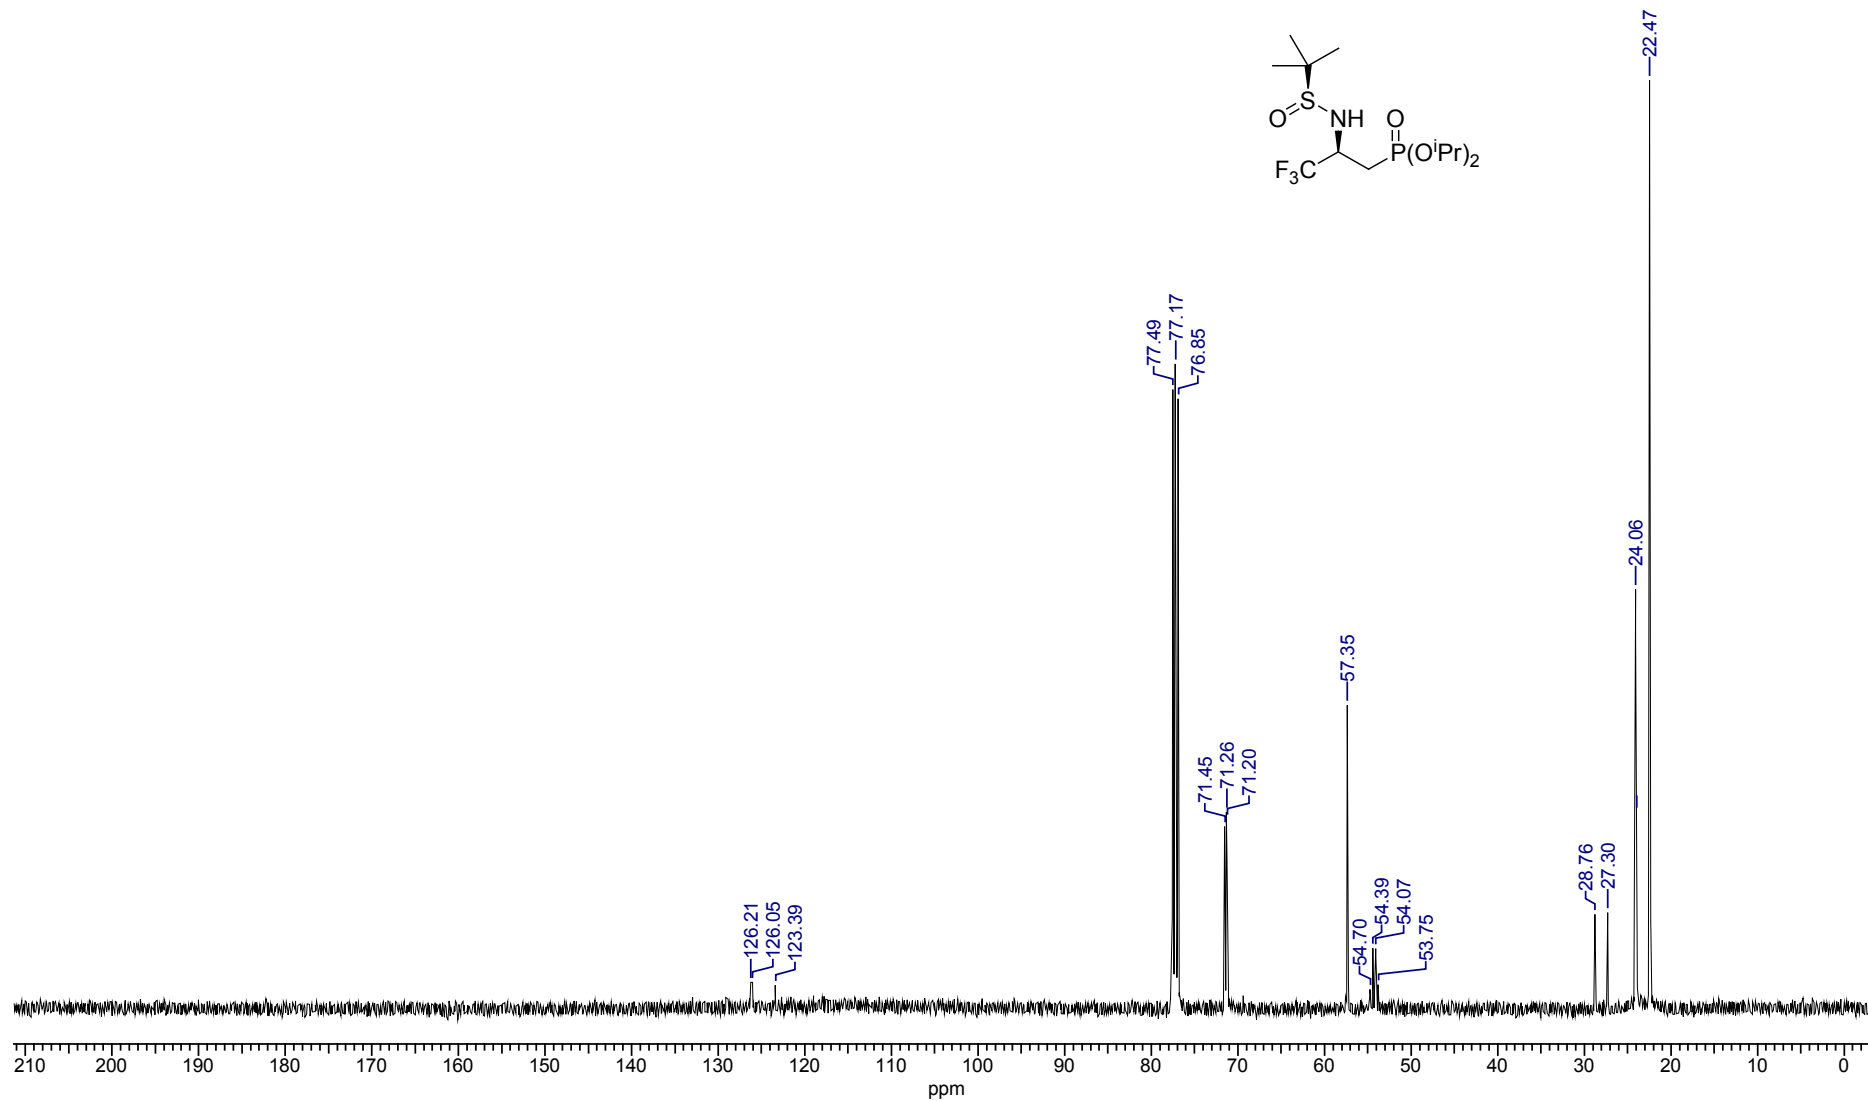

S22

|                               |          |                               |                 |                             |                                                                                  |                              |       |
|-------------------------------|----------|-------------------------------|-----------------|-----------------------------|----------------------------------------------------------------------------------|------------------------------|-------|
| <b>Acquisition Time (sec)</b> | 0.3400   | <b>Date</b>                   | May 10 2012     | <b>File Name</b>            | D:\Nuts95\Data\Spectra-Aminophosphonates\Diisopropyl methylphosphonate\IP_65-F19 |                              |       |
| <b>Frequency (MHz)</b>        | 376.29   | <b>Nucleus</b>                | <sup>19</sup> F | <b>Number of Transients</b> | 4                                                                                | <b>Original Points Count</b> | 64000 |
| <b>Points Count</b>           | 65536    | <b>Pulse Sequence</b>         | s2pul           | <b>Solvent</b>              | CHLOROFORM-D                                                                     |                              |       |
| <b>Sweep Width (Hz)</b>       | 94117.65 | <b>Temperature (degree C)</b> | 20.000          |                             |                                                                                  |                              |       |

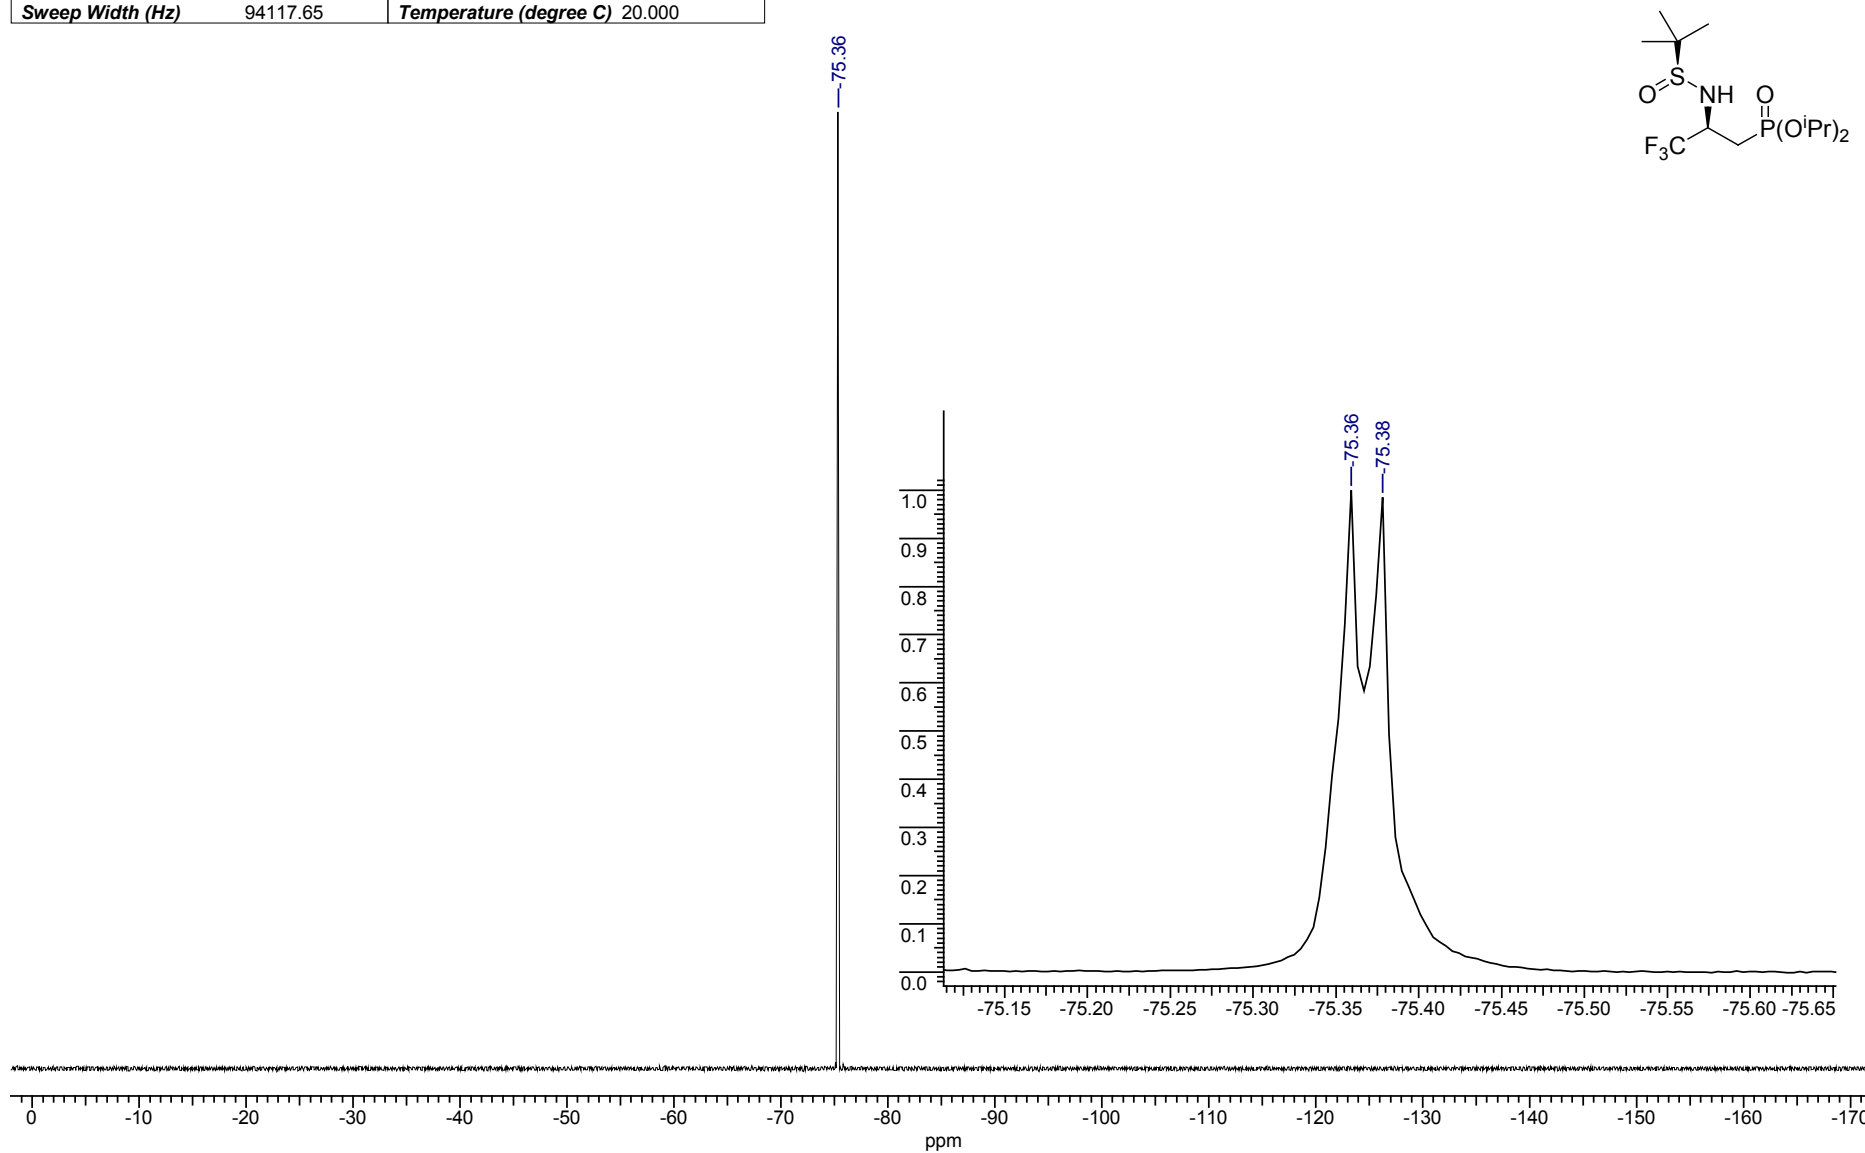

S23

22 Jun 2012

|                               |                                                                                                    |                             |                      |                              |             |                      |       |
|-------------------------------|----------------------------------------------------------------------------------------------------|-----------------------------|----------------------|------------------------------|-------------|----------------------|-------|
| <b>Acquisition Time (sec)</b> | 0.4063                                                                                             | <b>Comment</b>              | Imported from UXMNR. |                              | <b>Date</b> | 08 May 2012 10:03:44 |       |
| <b>File Name</b>              | D:\Nuts95\Data\Spectra-Aminophosphonates\Diisopropyl methylphosphonate\P_65-P31\P_65-P31_001000fid |                             |                      | <b>Frequency (MHz)</b>       | 202.44      |                      |       |
| <b>Nucleus</b>                | 31P                                                                                                | <b>Number of Transients</b> | 14                   | <b>Original Points Count</b> | 65536       | <b>Points Count</b>  | 65536 |
| <b>Pulse Sequence</b>         | zgpg                                                                                               | <b>Solvent</b>              | CHLOROFORM-D         | <b>Sweep Width (Hz)</b>      | 80645.16    |                      |       |

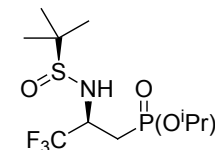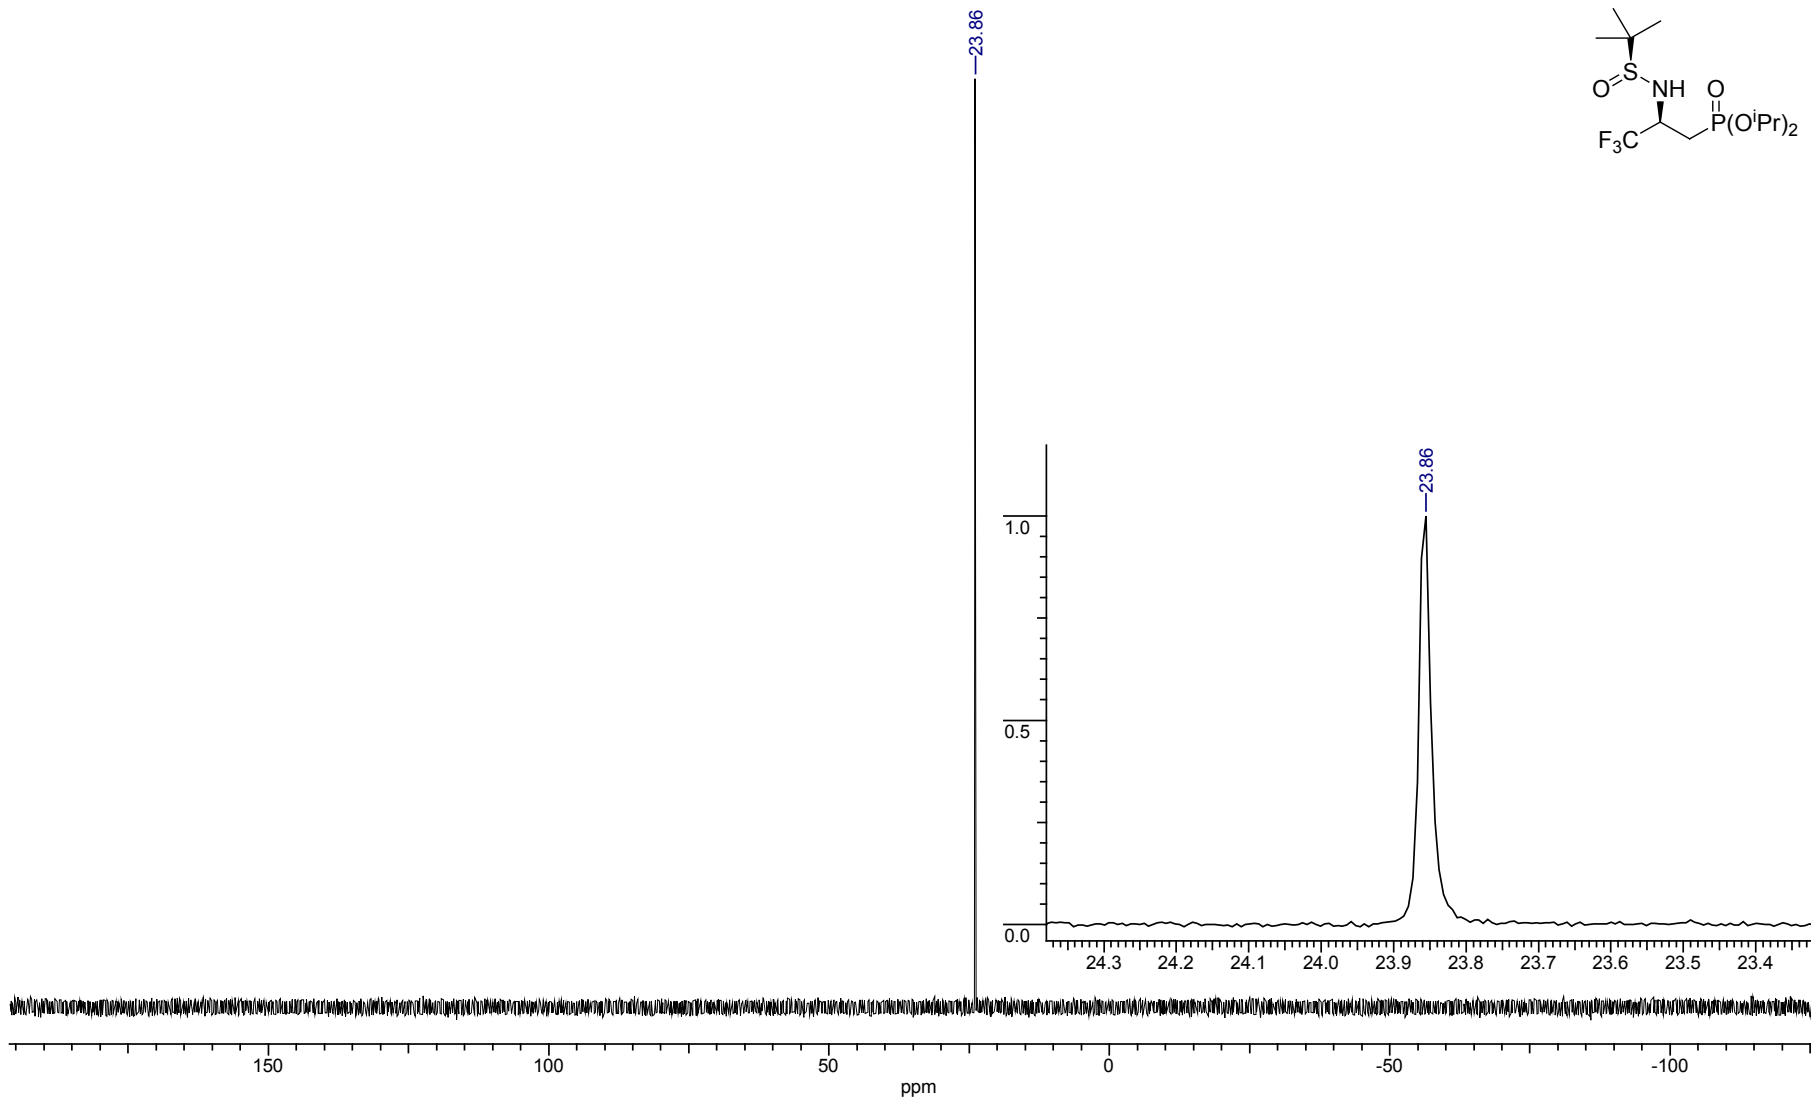

S24

|                               |                                                                                                 |                             |                |                              |                      |
|-------------------------------|-------------------------------------------------------------------------------------------------|-----------------------------|----------------|------------------------------|----------------------|
| <b>Acquisition Time (sec)</b> | 2.3962                                                                                          | <b>Comment</b>              | Turchenyuk, N1 | <b>Date</b>                  | 18 Apr 2012 10:42:08 |
| <b>File Name</b>              | C:\Nuts\Data\Spectra-Aminophosphonates\Deprotected diethyl methylphosphonate\P_59-1HP_59-1H_fid |                             |                | <b>Frequency (MHz)</b>       | 400.13               |
| <b>Nucleus</b>                | 1H                                                                                              | <b>Number of Transients</b> | 8              | <b>Original Points Count</b> | 30720                |
| <b>Pulse Sequence</b>         | zg                                                                                              | <b>Solvent</b>              | CHLOROFORM-D   | <b>Sweep Width (Hz)</b>      | 6410.26              |

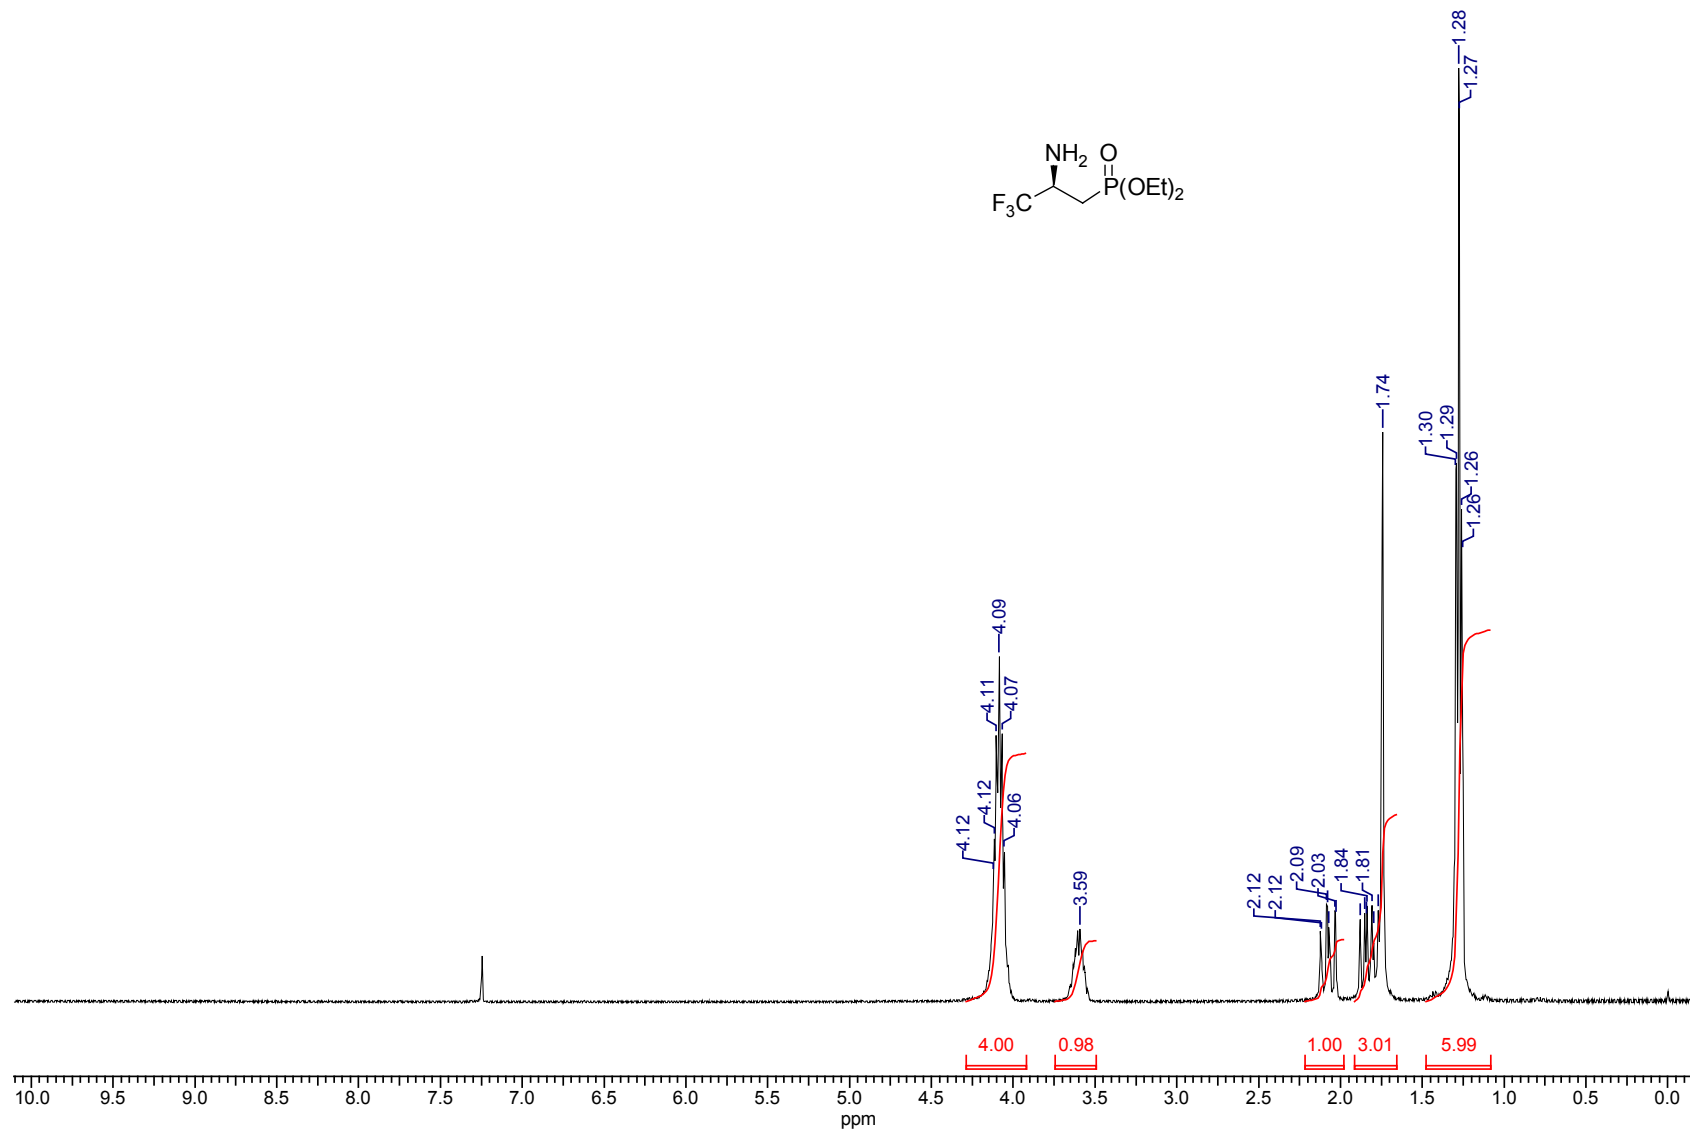



S25

|                                                                                                                     |                                        |                                    |
|---------------------------------------------------------------------------------------------------------------------|----------------------------------------|------------------------------------|
| <b>Acquisition Time (sec)</b> 0.6816                                                                                | <b>Comment</b> 13C NMR Spectrum, CDCl3 | <b>Date</b> 18 Apr 2012 10:40:00   |
| <b>File Name</b> C:\Nuts\Data\Spectra-Aminophosphonates\Deprotected diethyl methylphosphonate\P_59-13C\P_59-13C_fid |                                        | <b>Frequency (MHz)</b> 100.62      |
| <b>Nucleus</b> 13C                                                                                                  | <b>Number of Transients</b> 199        | <b>Original Points Count</b> 32768 |
| <b>Pulse Sequence</b> zgpg30                                                                                        | <b>Solvent</b> CHLOROFORM-D            | <b>Sweep Width (Hz)</b> 24038.46   |
|                                                                                                                     |                                        | <b>Points Count</b> 32768          |

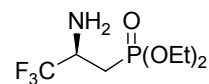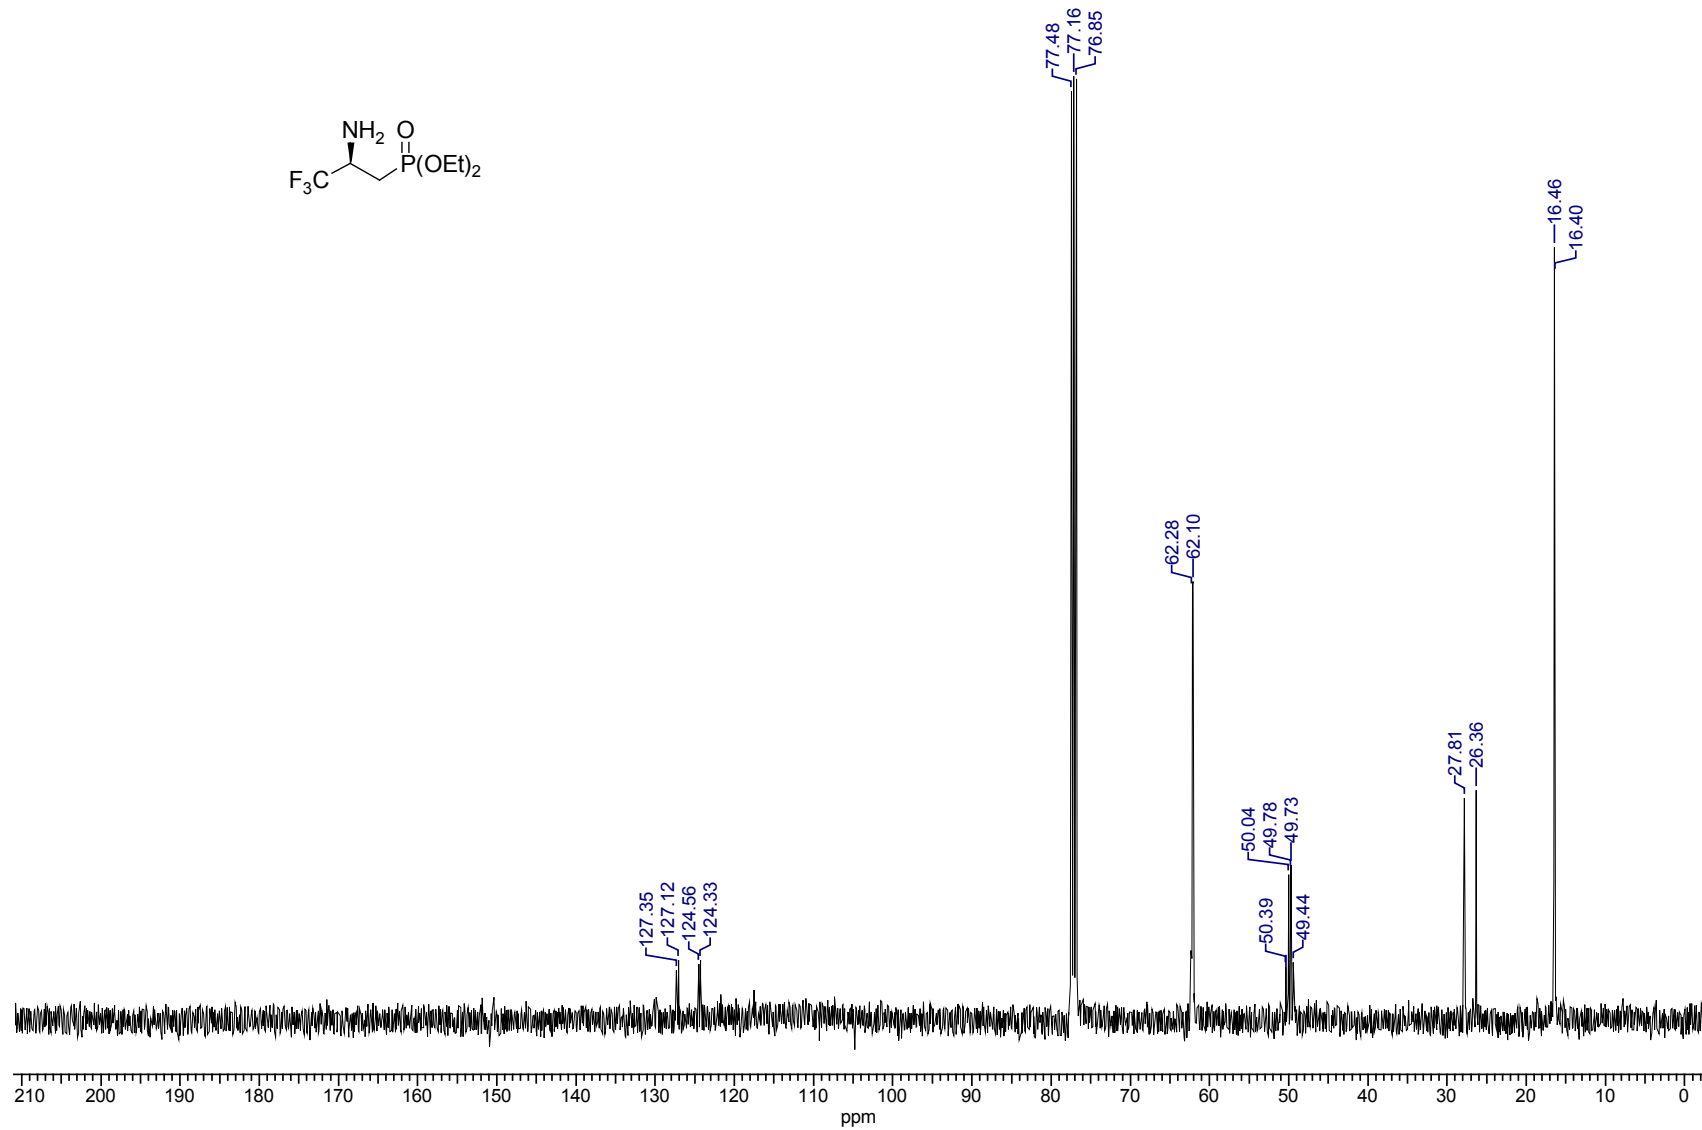

19 Jun 1997

|                                                                                                        |                               |                                    |                                  |
|--------------------------------------------------------------------------------------------------------|-------------------------------|------------------------------------|----------------------------------|
| <b>Acquisition Time (sec)</b> 0.3400                                                                   | <b>Date</b> Apr 12 2012       |                                    |                                  |
| <b>File Name</b> C:\Nuts\Data\Spectra-Aminophosphonates\Deprotected diethyl methylphosphonate\P_57-F19 |                               | <b>Frequency (MHz)</b> 376.29      |                                  |
| <b>Nucleus</b> 19F                                                                                     | <b>Number of Transients</b> 4 | <b>Original Points Count</b> 64000 | <b>Points Count</b> 65536        |
| <b>Pulse Sequence</b> s2pul                                                                            | <b>Solvent</b> CHLOROFORM-D   |                                    | <b>Sweep Width (Hz)</b> 94117.65 |
| <b>Temperature (degree C)</b> 20.000                                                                   |                               |                                    |                                  |

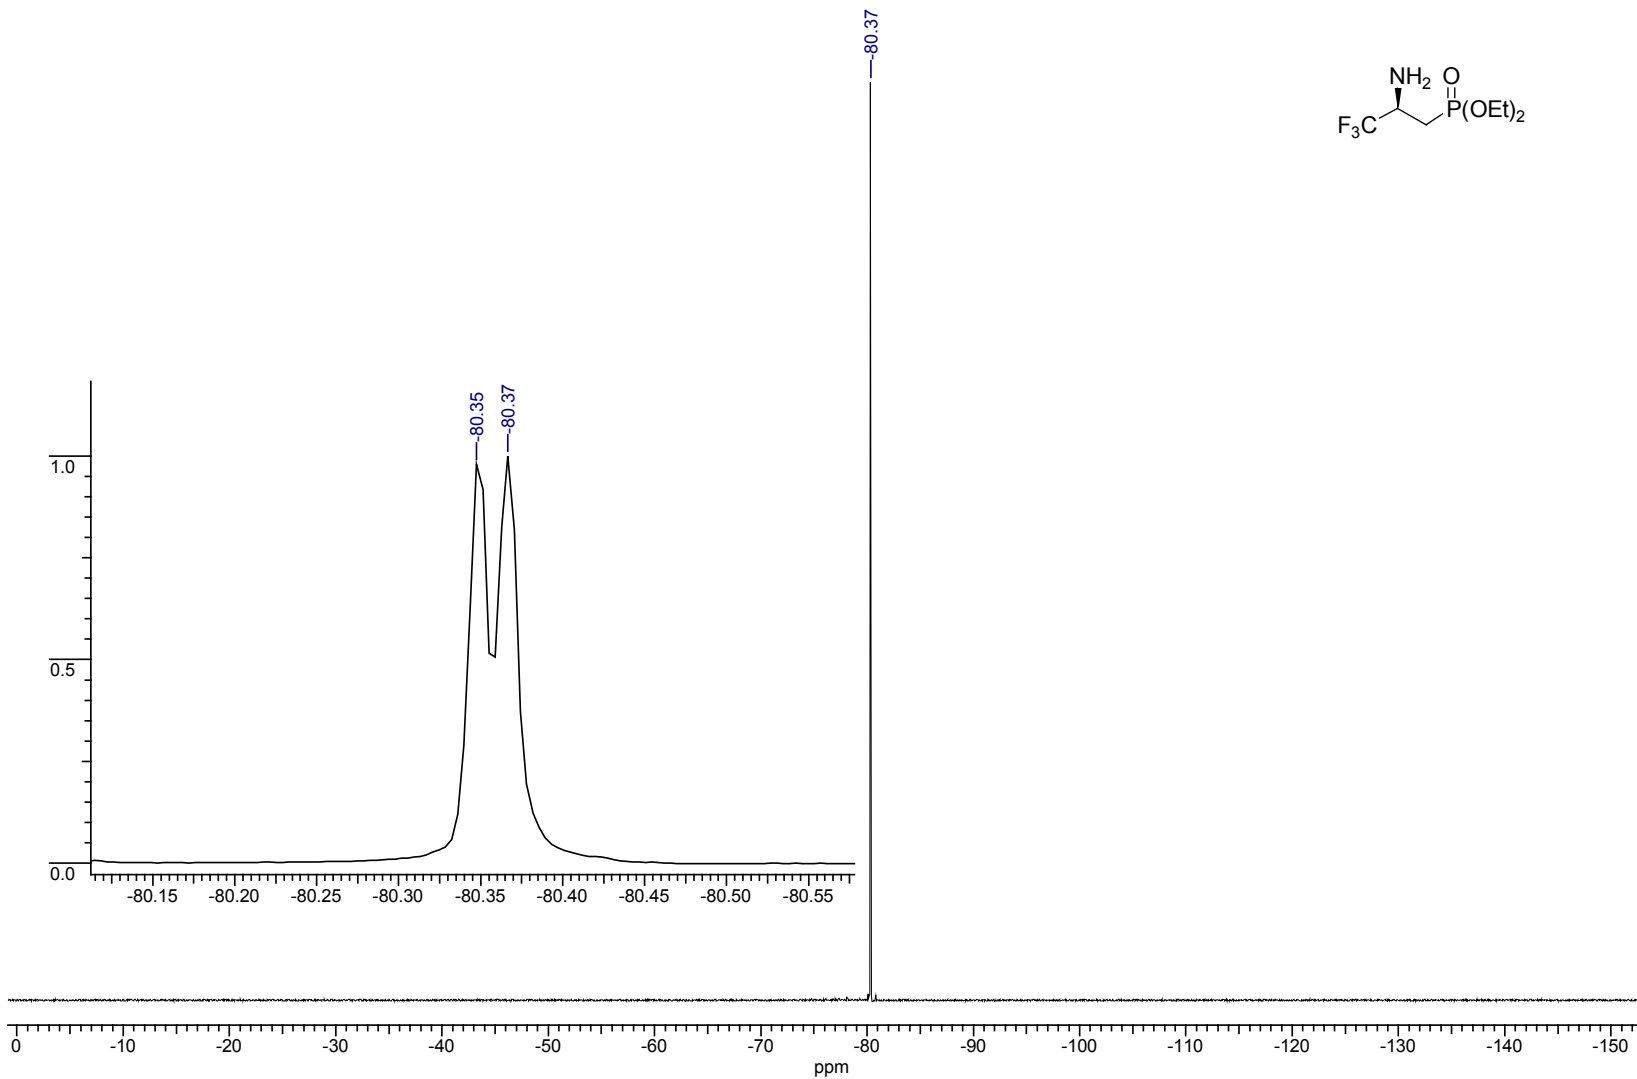

S27

|                                                                                                                          |                                     |                                    |
|--------------------------------------------------------------------------------------------------------------------------|-------------------------------------|------------------------------------|
| <b>Acquisition Time (sec)</b> 0.4063                                                                                     | <b>Comment</b> Imported from UXMNR. | <b>Date</b> 28 Apr 2012 10:50:40   |
| <b>File Name</b> C:\Nuts\Data\Spectra-Aminophosphonates\Deprotected diethyl methylphosphonate\P_60-P31P_60-P31_001000fid |                                     | <b>Frequency (MHz)</b> 202.44      |
| <b>Nucleus</b> 31P                                                                                                       | <b>Number of Transients</b> 10      | <b>Original Points Count</b> 65536 |
| <b>Pulse Sequence</b> zgpg                                                                                               | <b>Solvent</b> CHLOROFORM-D         | <b>Sweep Width (Hz)</b> 80645.16   |

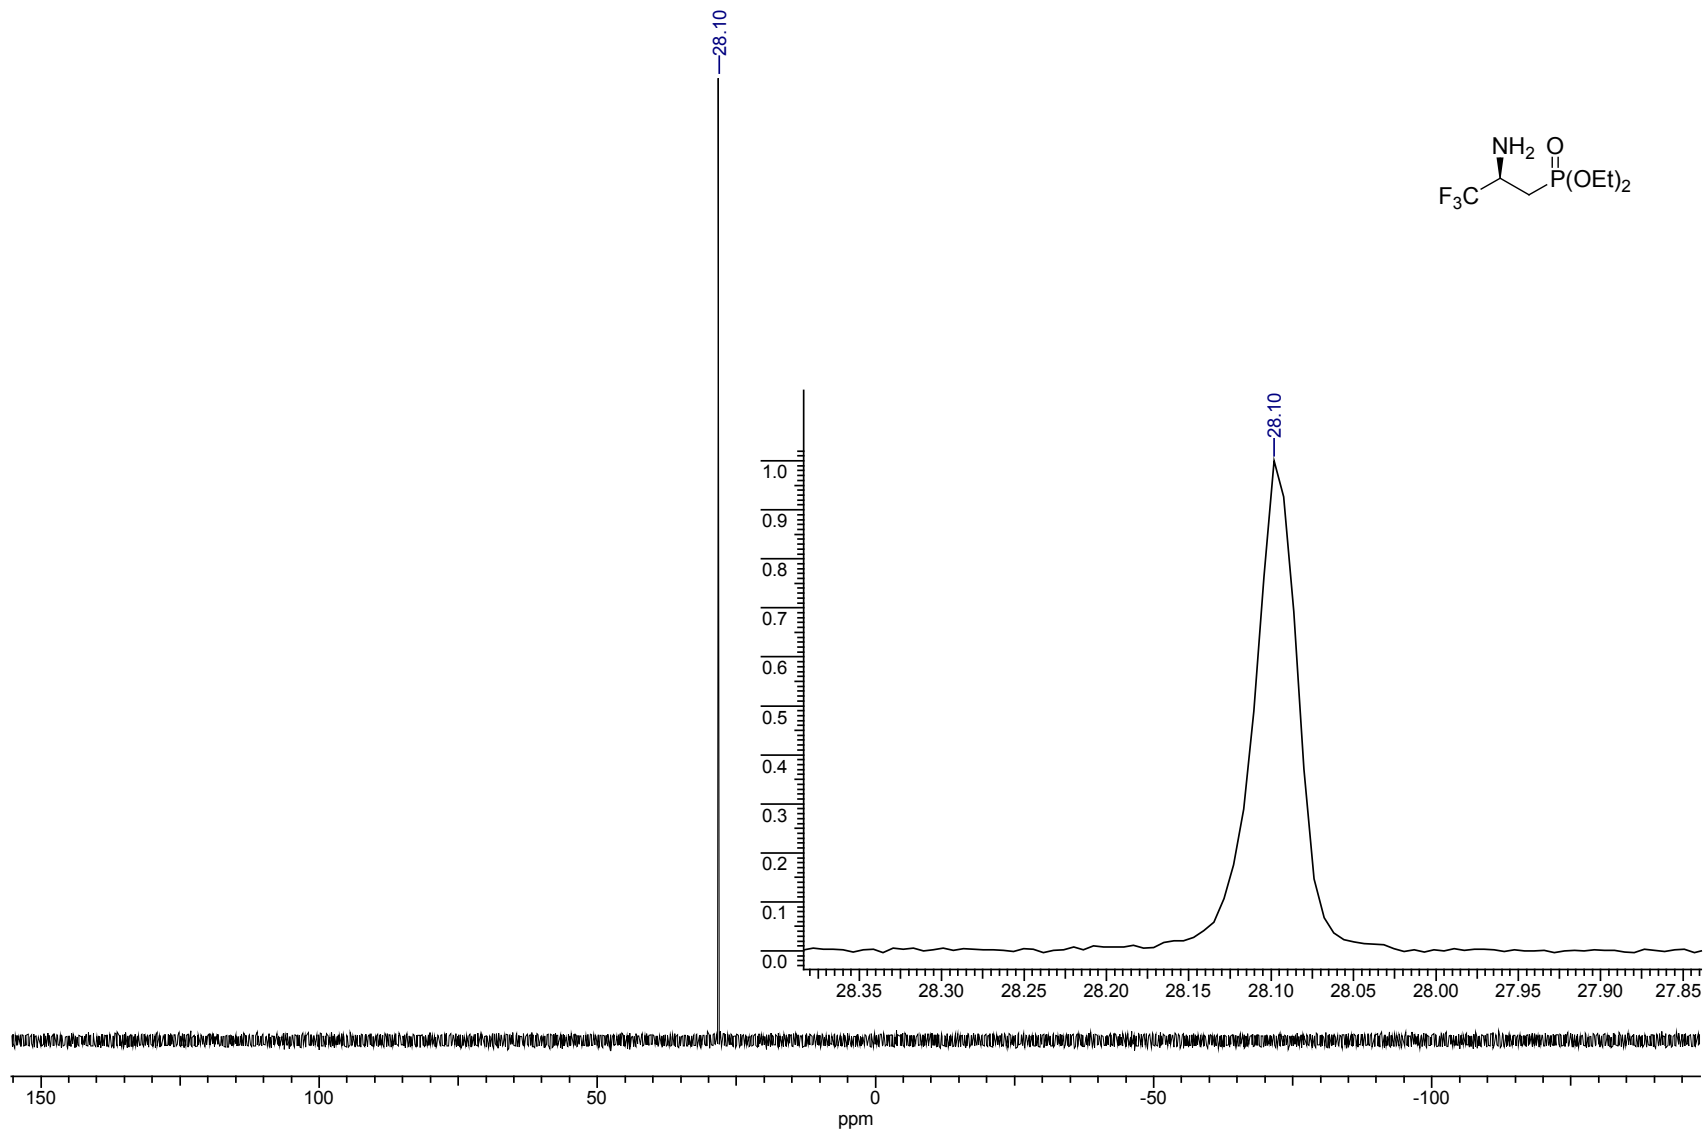

S28

|                               |                                                                                      |                             |                      |                              |                         |                      |       |
|-------------------------------|--------------------------------------------------------------------------------------|-----------------------------|----------------------|------------------------------|-------------------------|----------------------|-------|
| <b>Acquisition Time (sec)</b> | 2.8049                                                                               | <b>Comment</b>              | 1H NMR Spectrum, D2O |                              | <b>Date</b>             | 23 May 2012 12:28:48 |       |
| <b>File Name</b>              | C:\Nuts\Data\Spectra-Aminophosphonates\Phosphonic acid\1H-D2O+CH3CN\1H-D2O+CH3CN_fid |                             |                      |                              | <b>Frequency (MHz)</b>  | 400.13               |       |
| <b>Nucleus</b>                | 1H                                                                                   | <b>Number of Transients</b> | 16                   | <b>Original Points Count</b> | 16384                   | <b>Points Count</b>  | 16384 |
| <b>Pulse Sequence</b>         | zg                                                                                   | <b>Solvent</b>              | D2O+CD3CN            |                              | <b>Sweep Width (Hz)</b> | 2920.56              |       |
| <b>Temperature (degree C)</b> | 20.882                                                                               |                             |                      |                              |                         |                      |       |

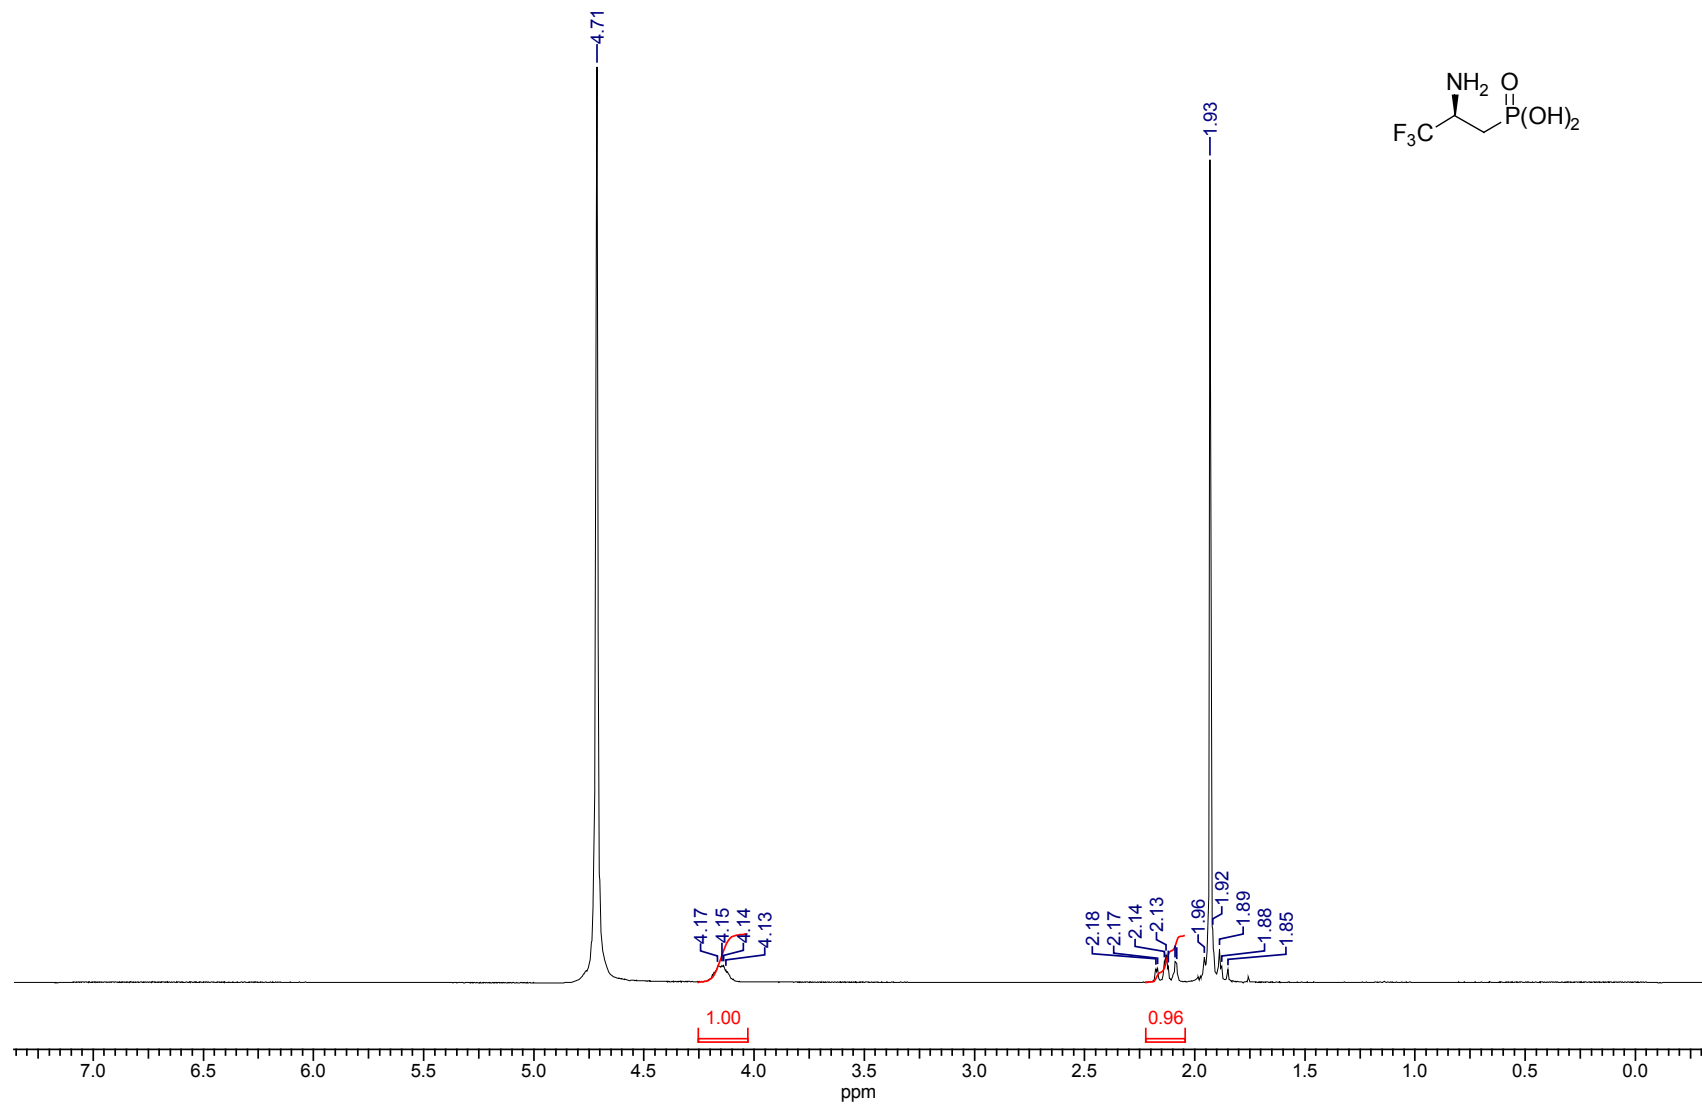

S29

|                               |                                                                            |                             |                              |                              |                         |                      |       |
|-------------------------------|----------------------------------------------------------------------------|-----------------------------|------------------------------|------------------------------|-------------------------|----------------------|-------|
| <b>Acquisition Time (sec)</b> | 0.6816                                                                     | <b>Comment</b>              | 13C APT NMR Spectrum, in D2O |                              | <b>Date</b>             | 23 May 2012 12:30:56 |       |
| <b>File Name</b>              | C:\Nuts\Data\Spectra-Aminophosphonates\Phosphonic acid\13C-APT\13C-APT_fid |                             |                              |                              | <b>Frequency (MHz)</b>  | 100.62               |       |
| <b>Nucleus</b>                | 13C                                                                        | <b>Number of Transients</b> | 514                          | <b>Original Points Count</b> | 32768                   | <b>Points Count</b>  | 32768 |
| <b>Pulse Sequence</b>         | jmod                                                                       | <b>Solvent</b>              | DEUTERIUM OXIDE              |                              | <b>Sweep Width (Hz)</b> | 24038.46             |       |
| <b>Temperature (degree C)</b> | 21.118                                                                     |                             |                              |                              |                         |                      |       |

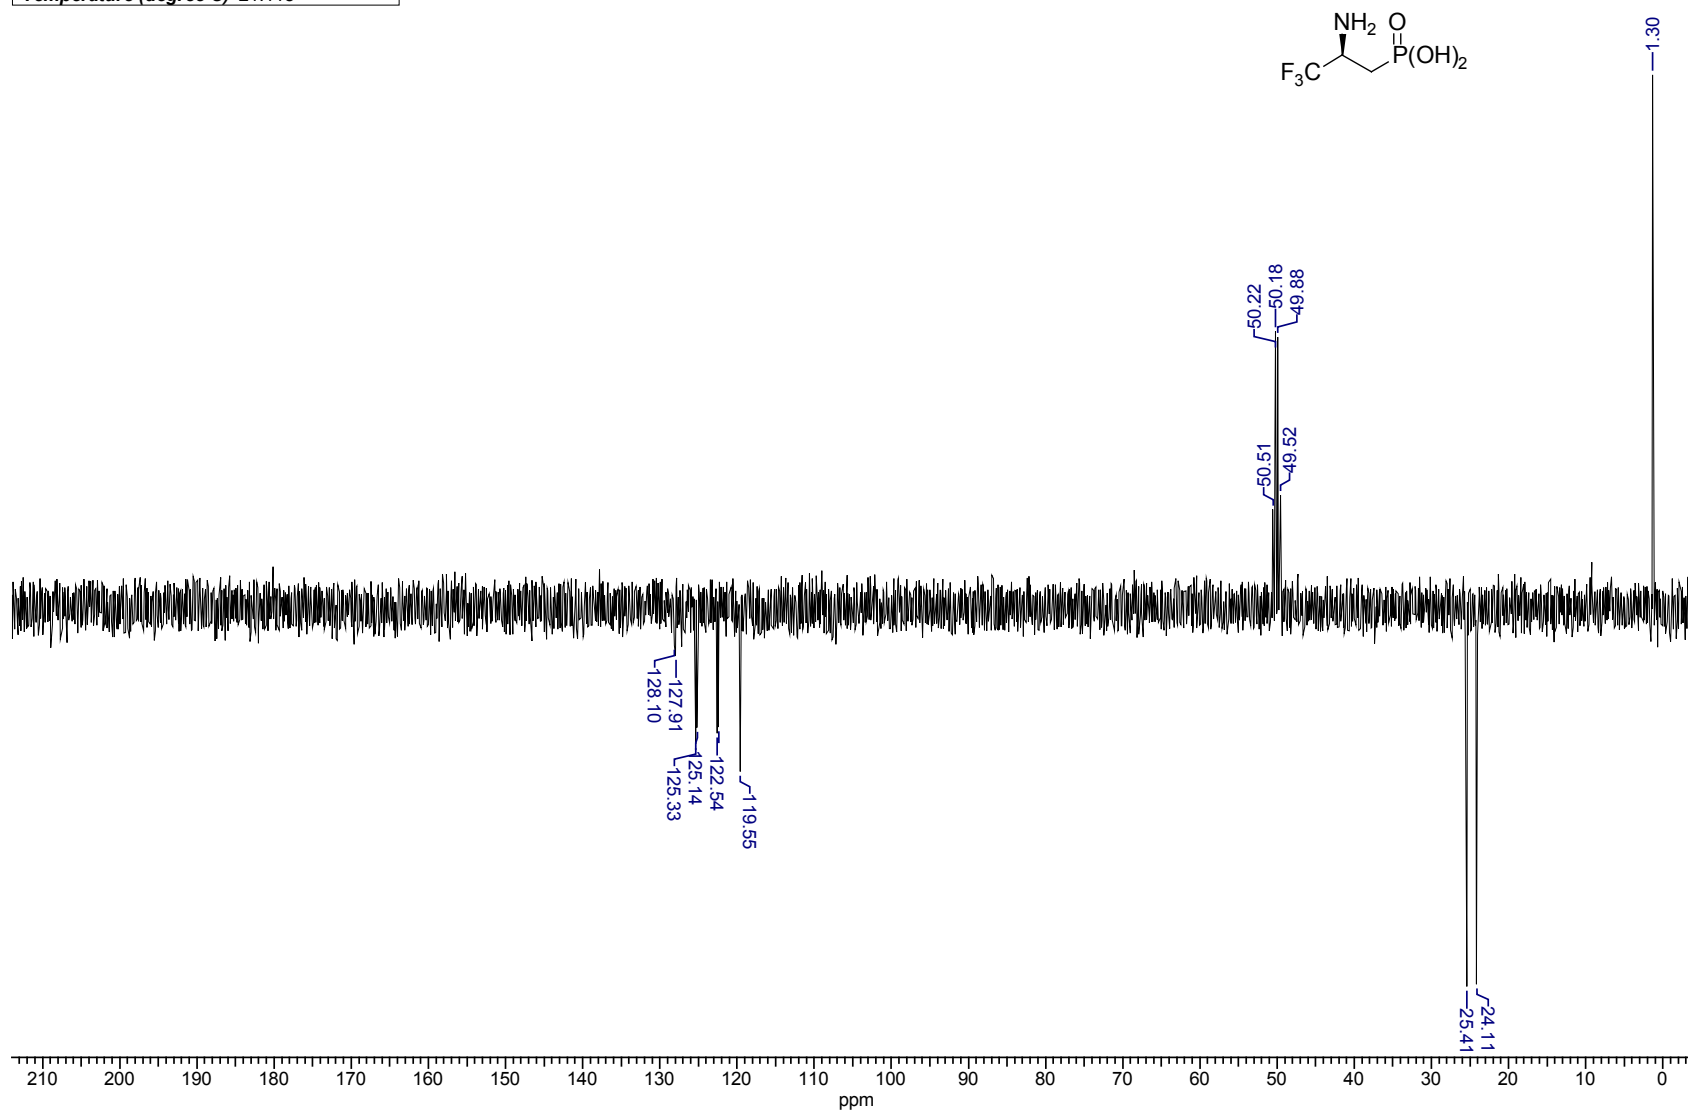

S30

|                               |                                                                 |                             |                 |                              |             |                     |          |
|-------------------------------|-----------------------------------------------------------------|-----------------------------|-----------------|------------------------------|-------------|---------------------|----------|
| <b>Acquisition Time (sec)</b> | 1.2954                                                          | <b>Comment</b>              | 19F SENSITIVITY |                              | <b>Date</b> | Jun 25 2012         |          |
| <b>File Name</b>              | D:\Nuts95\Data\Spectra-Aminophosphonates\Phosphonic acid\p-91-f |                             |                 | <b>Frequency (MHz)</b>       | 376.41      |                     |          |
| <b>Nucleus</b>                | 19F                                                             | <b>Number of Transients</b> | 256             | <b>Original Points Count</b> | 48000       | <b>Points Count</b> | 65536    |
| <b>Pulse Sequence</b>         | s2pul                                                           | <b>Solvent</b>              | D2O             | <b>Sweep Width (Hz)</b>      |             |                     | 18527.71 |
| <b>Temperature (degree C)</b> | 20.000                                                          |                             |                 |                              |             |                     |          |

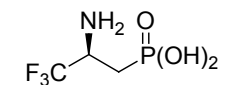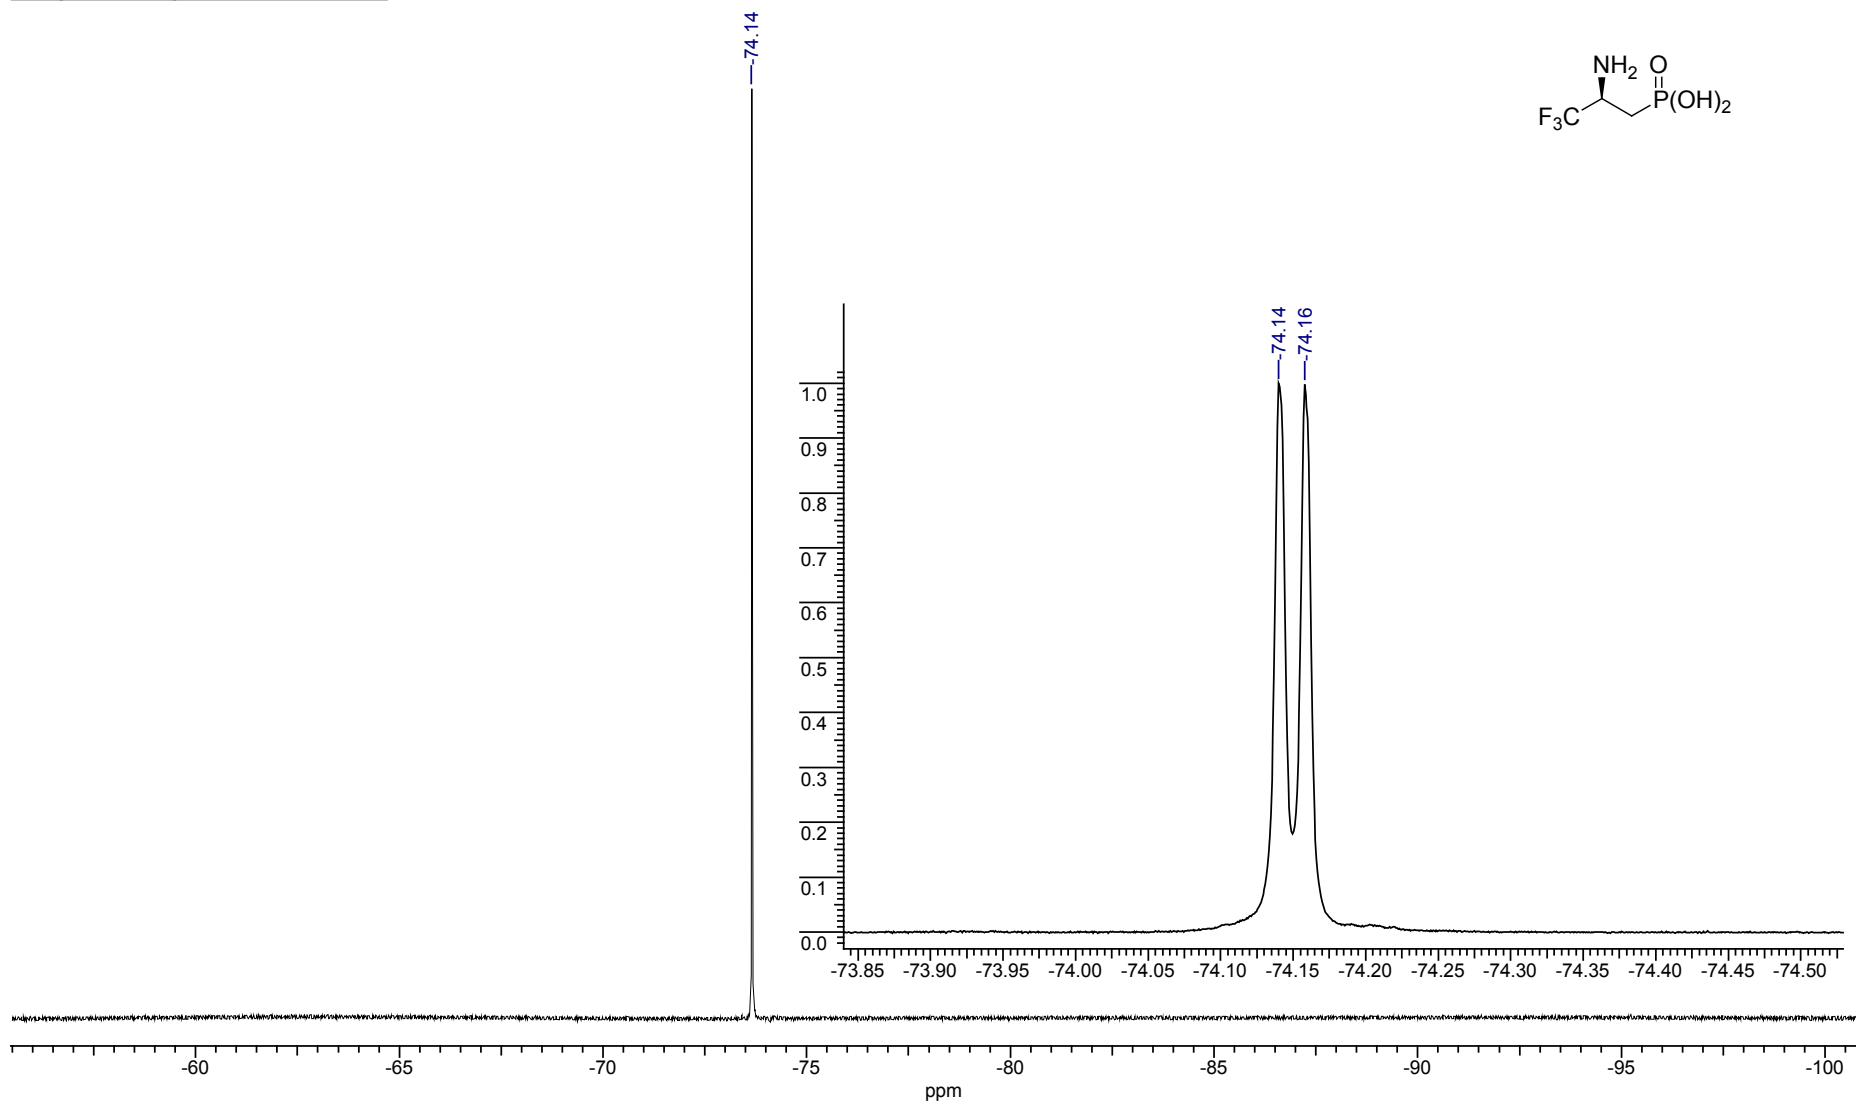

S31

|                               |                                                                 |                               |           |                       |             |                        |        |                |     |
|-------------------------------|-----------------------------------------------------------------|-------------------------------|-----------|-----------------------|-------------|------------------------|--------|----------------|-----|
| <b>Acquisition Time (sec)</b> | 0.3200                                                          | <b>Comment</b>                | DMSO 1203 | <b>Date</b>           | Jun 25 2012 |                        |        |                |     |
| <b>File Name</b>              | D:\Nuts95\Data\Spectra-Aminophosphonates\Phosphonic acid\p-91-p |                               |           |                       |             | <b>Frequency (MHz)</b> | 161.96 | <b>Nucleus</b> | 31P |
| <b>Original Points Count</b>  | 64000                                                           | <b>Points Count</b>           | 65536     | <b>Pulse Sequence</b> | s2pul       | <b>Solvent</b>         | D2O    |                |     |
| <b>Sweep Width (Hz)</b>       | 100000.00                                                       | <b>Temperature (degree C)</b> | 20.000    |                       |             |                        |        |                |     |

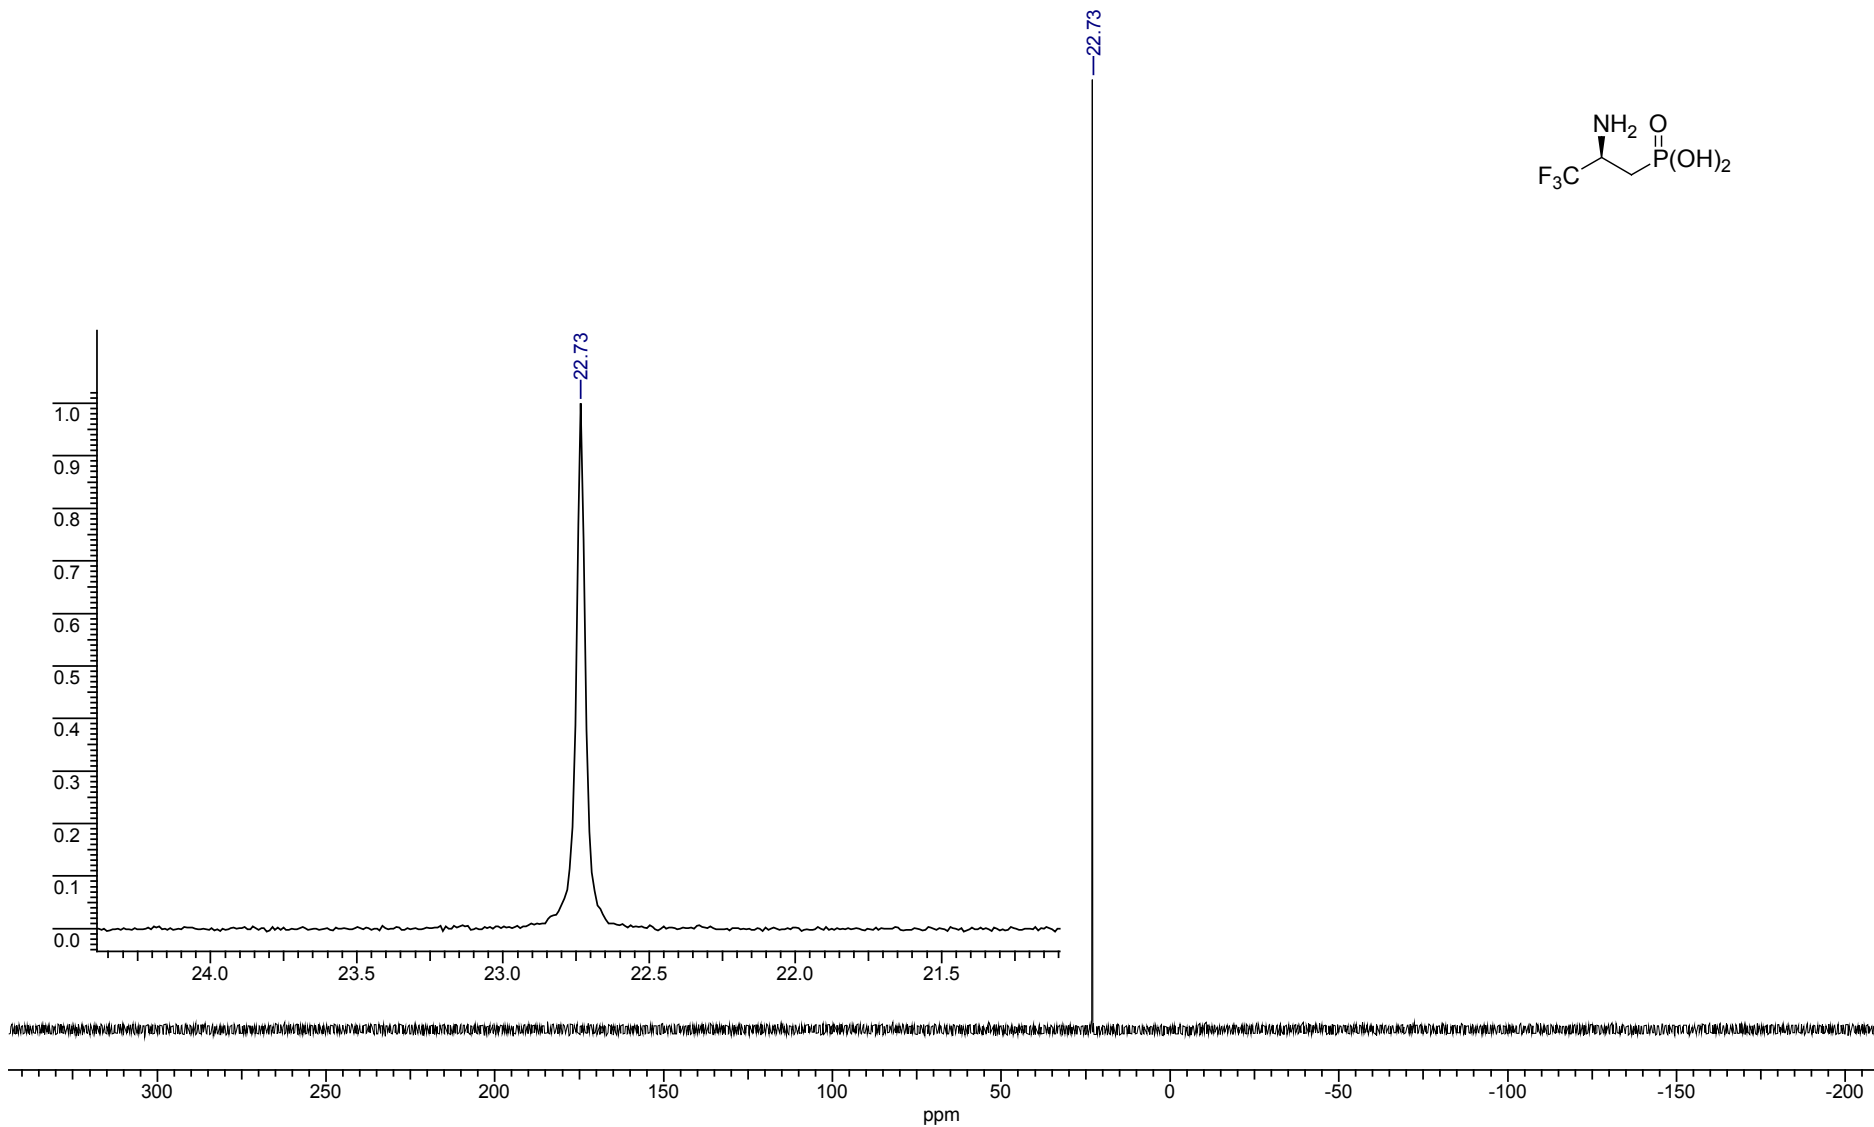

|                               |                                                          |                              |       |                         |             |                               |        |
|-------------------------------|----------------------------------------------------------|------------------------------|-------|-------------------------|-------------|-------------------------------|--------|
| <b>Acquisition Time (sec)</b> | 1.1250                                                   | <b>Comment</b>               | CDCl3 | <b>Date</b>             | Jul 26 2012 |                               |        |
| <b>File Name</b>              | C:\Nuts\Data\Spectra-Aminophosphonates\Peptide AlaIp-104 |                              |       | <b>Frequency (MHz)</b>  | 400.08      | <b>Nucleus</b>                | 1H     |
| <b>Number of Transients</b>   | 8                                                        | <b>Original Points Count</b> | 18000 | <b>Points Count</b>     | 32768       | <b>Pulse Sequence</b>         | s2pul  |
| <b>Solvent</b>                | CHLOROFORM-D                                             |                              |       | <b>Sweep Width (Hz)</b> | 8000.00     | <b>Temperature (degree C)</b> | 20.000 |

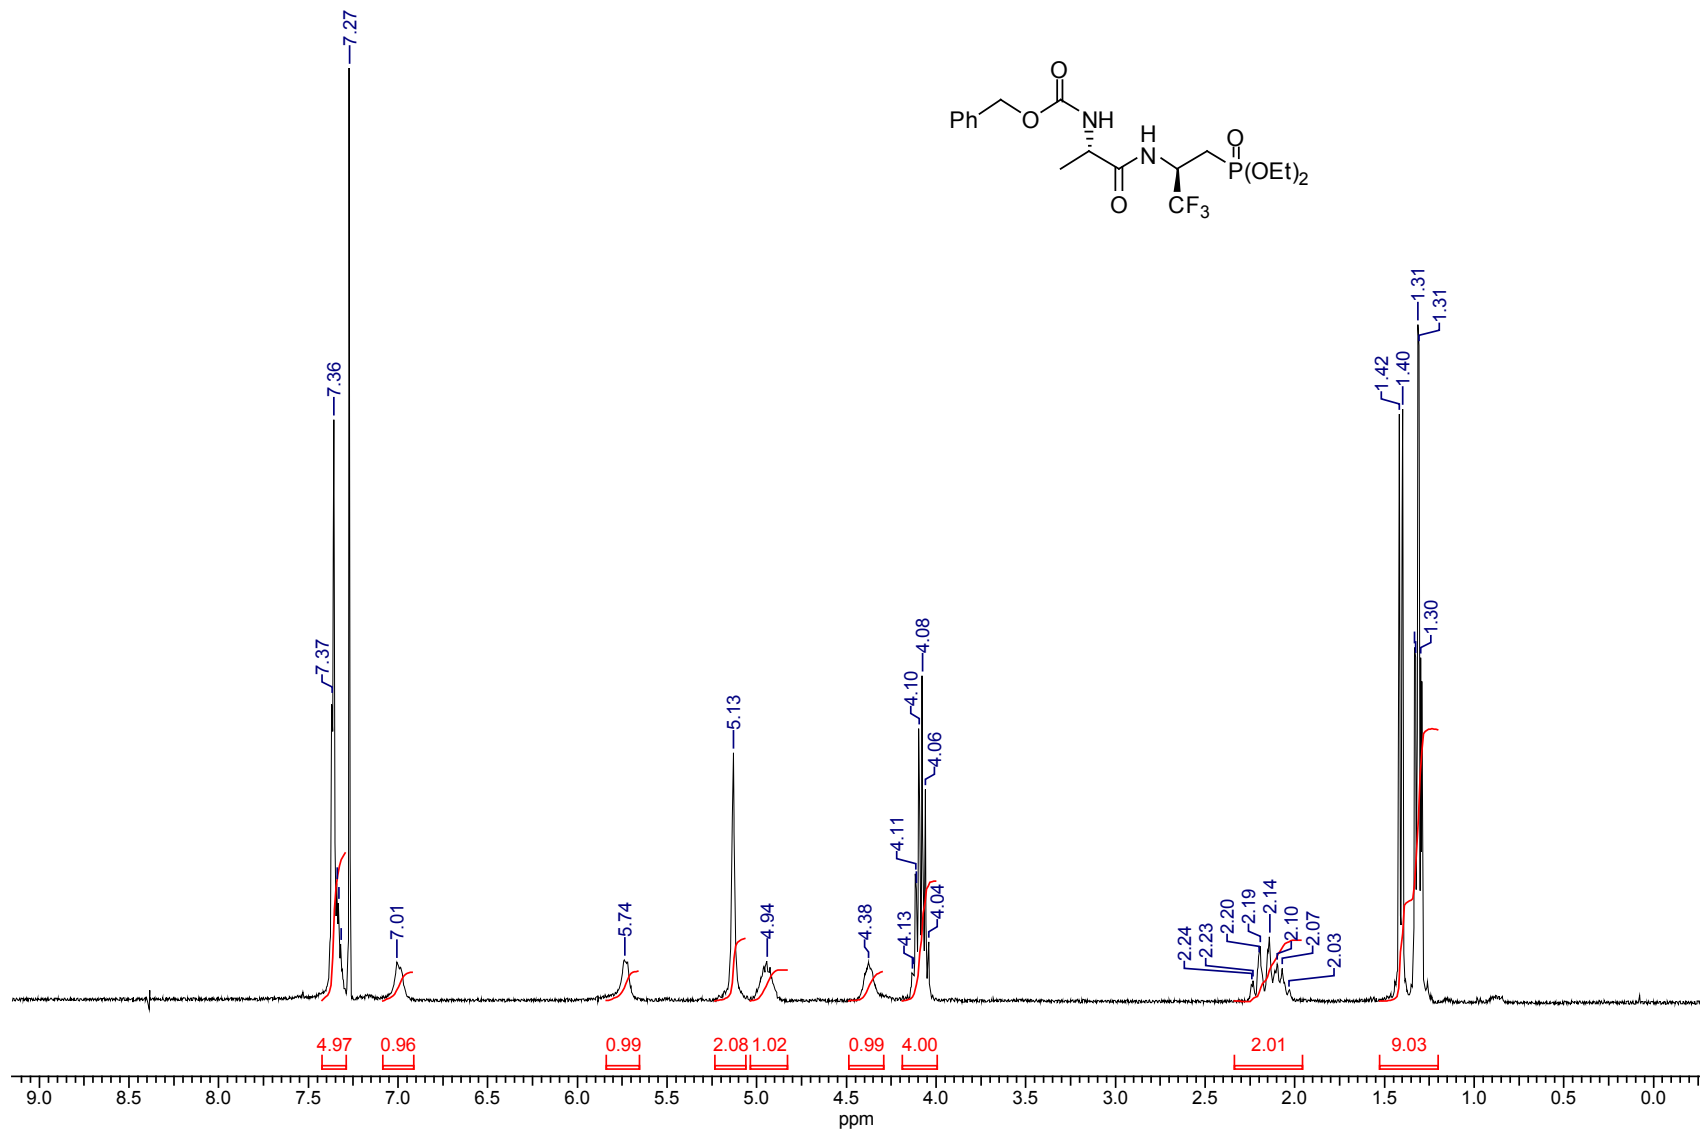



|                                                                                                         |                                     |                                    |
|---------------------------------------------------------------------------------------------------------|-------------------------------------|------------------------------------|
| <b>Acquisition Time (sec)</b> 0.7834                                                                    | <b>Comment</b> Imported from UXNMR. | <b>Date</b> 23 Jul 2012 19:18:24   |
| <b>File Name</b> C:\Nuts\Data\Spectra-Aminophosphonates\Peptide Ala\tyr-p103-C13\tyr-p103-C13_001000fid |                                     | <b>Frequency (MHz)</b> 125.76      |
| <b>Nucleus</b> 13C                                                                                      | <b>Number of Transients</b> 583     | <b>Original Points Count</b> 51200 |
| <b>Pulse Sequence</b> zgpg                                                                              | <b>Solvent</b> CHLOROFORM-D         | <b>Sweep Width (Hz)</b> 32679.74   |

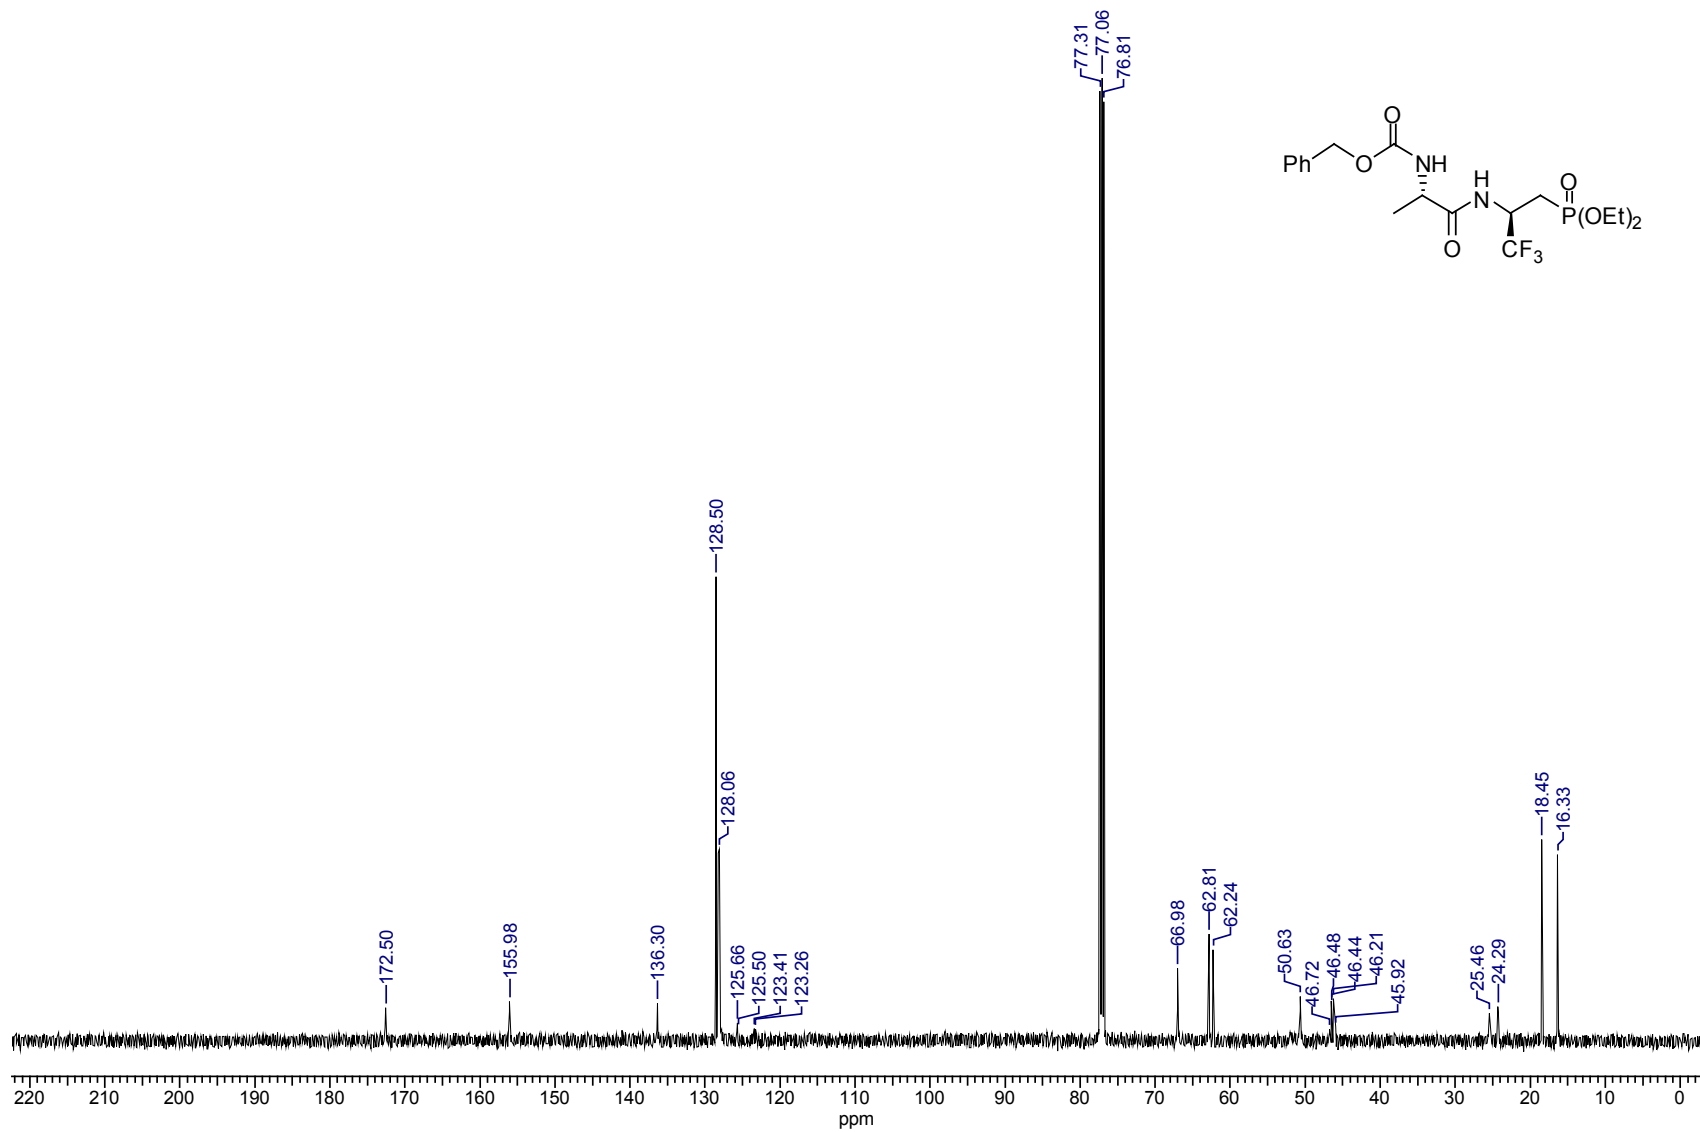

29 Jul 2012

|                                                                             |                                       |                                    |
|-----------------------------------------------------------------------------|---------------------------------------|------------------------------------|
| <b>Acquisition Time (sec)</b> 1.9816                                        | <b>Comment</b> 19F SENSITIVITY        | <b>Date</b> Jul 26 2012            |
| <b>File Name</b> C:\Nuts\Data\Spectra-Aminophosphonates\Peptide AlaIp-104-f |                                       | <b>Frequency (MHz)</b> 376.42      |
| <b>Nucleus</b> 19F                                                          | <b>Number of Transients</b> 256       | <b>Original Points Count</b> 64000 |
| <b>Pulse Sequence</b> s2pul                                                 | <b>Solvent</b> TRIFLUOROACETIC ACID-D | <b>Points Count</b> 65536          |
| <b>Temperature (degree C)</b> 25.000                                        |                                       | <b>Sweep Width (Hz)</b> 16148.53   |

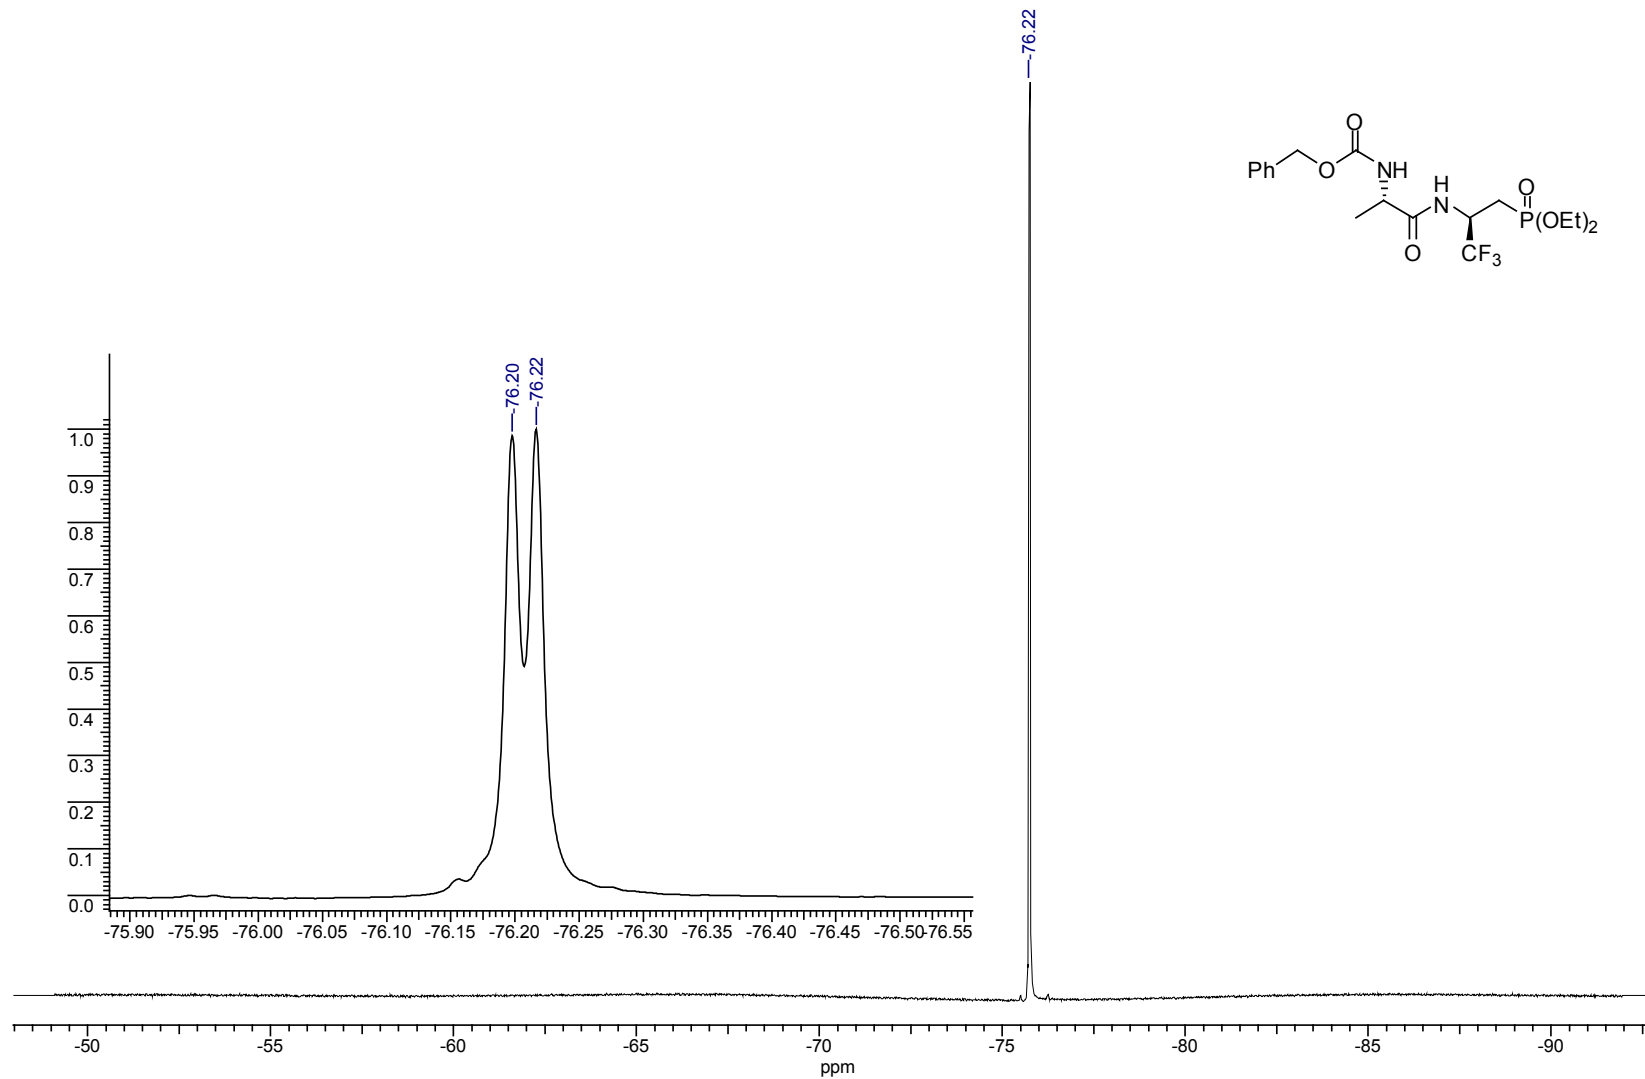

S35

|                               |                                                            |                              |           |                         |                        |                               |        |
|-------------------------------|------------------------------------------------------------|------------------------------|-----------|-------------------------|------------------------|-------------------------------|--------|
| <b>Acquisition Time (sec)</b> | 0.3200                                                     | <b>Comment</b>               | DMSO 1203 | <b>Date</b>             | Jul 26 2012            |                               |        |
| <b>File Name</b>              | C:\Nuts\Data\Spectra-Aminophosphonates\Peptide Ala(p-104-p |                              |           |                         | <b>Frequency (MHz)</b> | 161.96                        |        |
| <b>Nucleus</b>                | 31P                                                        | <b>Original Points Count</b> | 64000     | <b>Points Count</b>     | 65536                  | <b>Pulse Sequence</b>         | s2pul  |
| <b>Solvent</b>                | CHLOROFORM-D                                               |                              |           | <b>Sweep Width (Hz)</b> | 100000.00              | <b>Temperature (degree C)</b> | 20.000 |

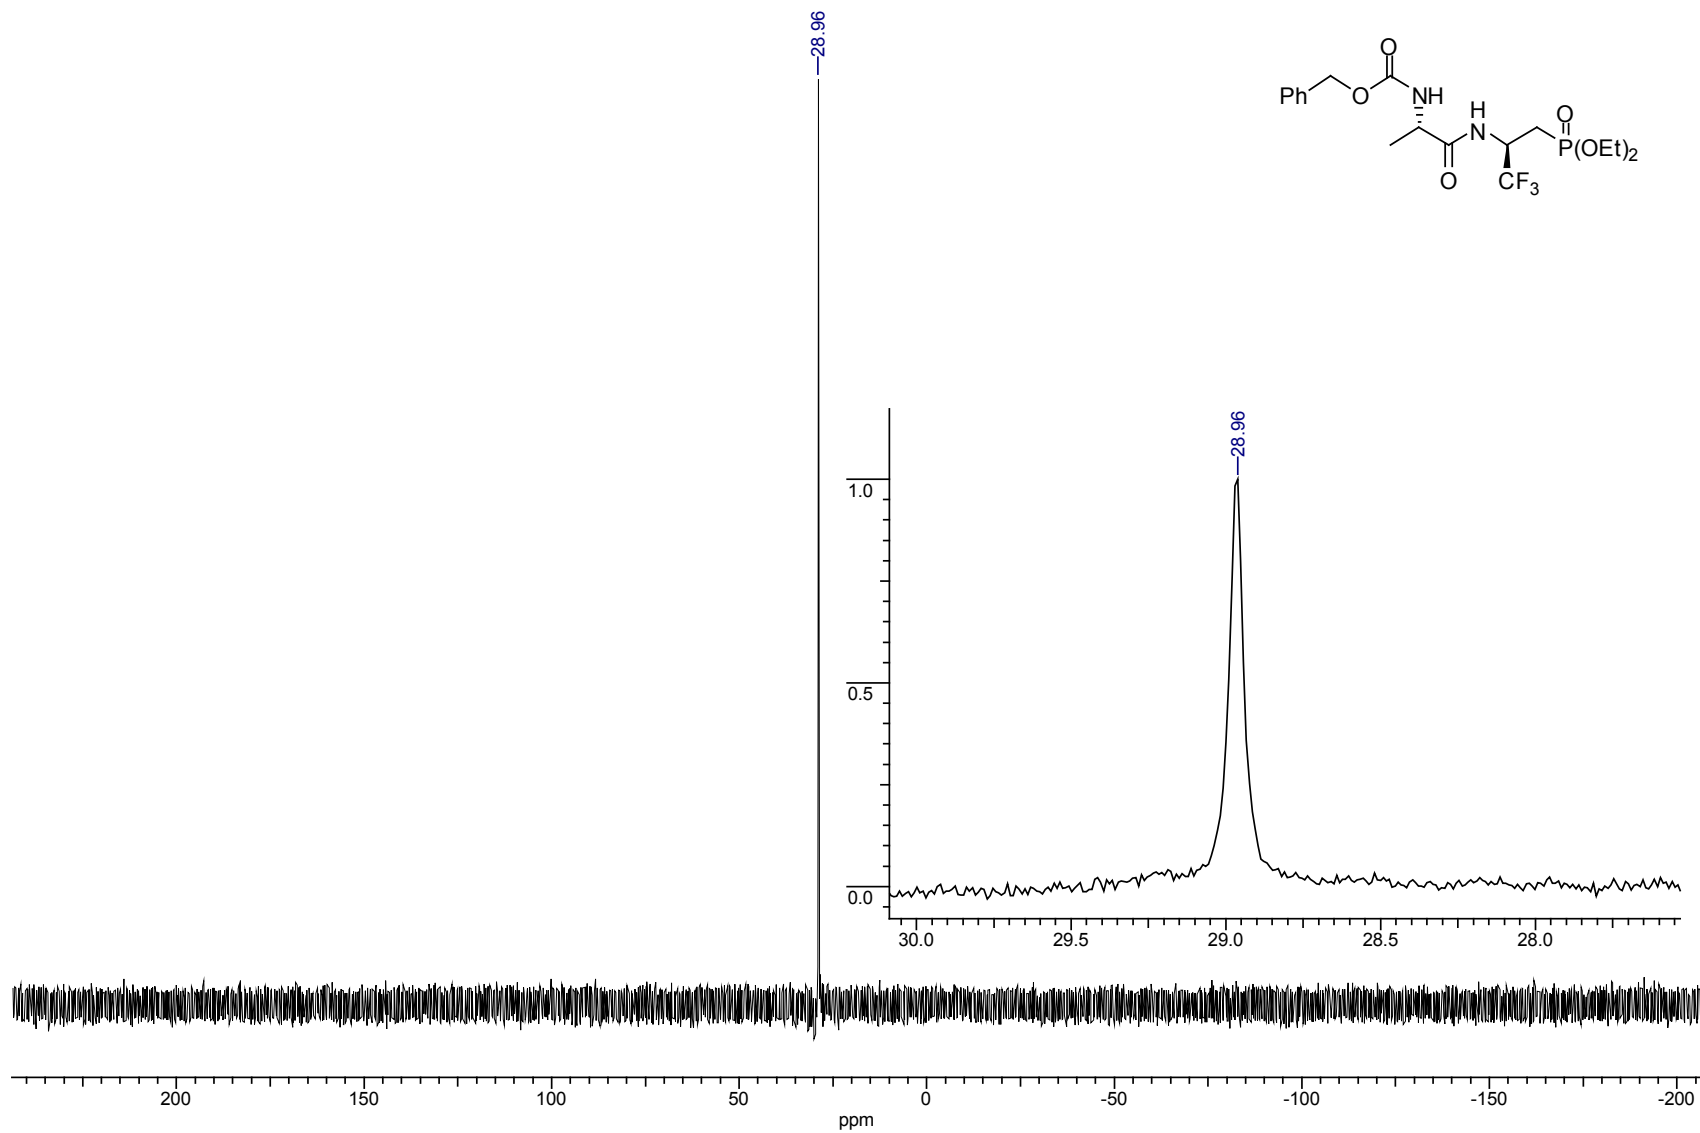

|                                                                         |                                      |                                  |
|-------------------------------------------------------------------------|--------------------------------------|----------------------------------|
| <b>Acquisition Time (sec)</b> 0.8566                                    | <b>Comment</b> LYBRICS Imported file | <b>Date</b> 08 Jun 2012 11:44:54 |
| <b>File Name</b> C:\Nuts\Data\Spectra-Aminophosphonates\Peptide PhAla\H | <b>Frequency (MHz)</b> 299.94        | <b>Nucleus</b> 1H                |
| <b>Original Points Count</b> 8736                                       | <b>Points Count</b> 16384            | <b>Solvent</b> CDCl3             |

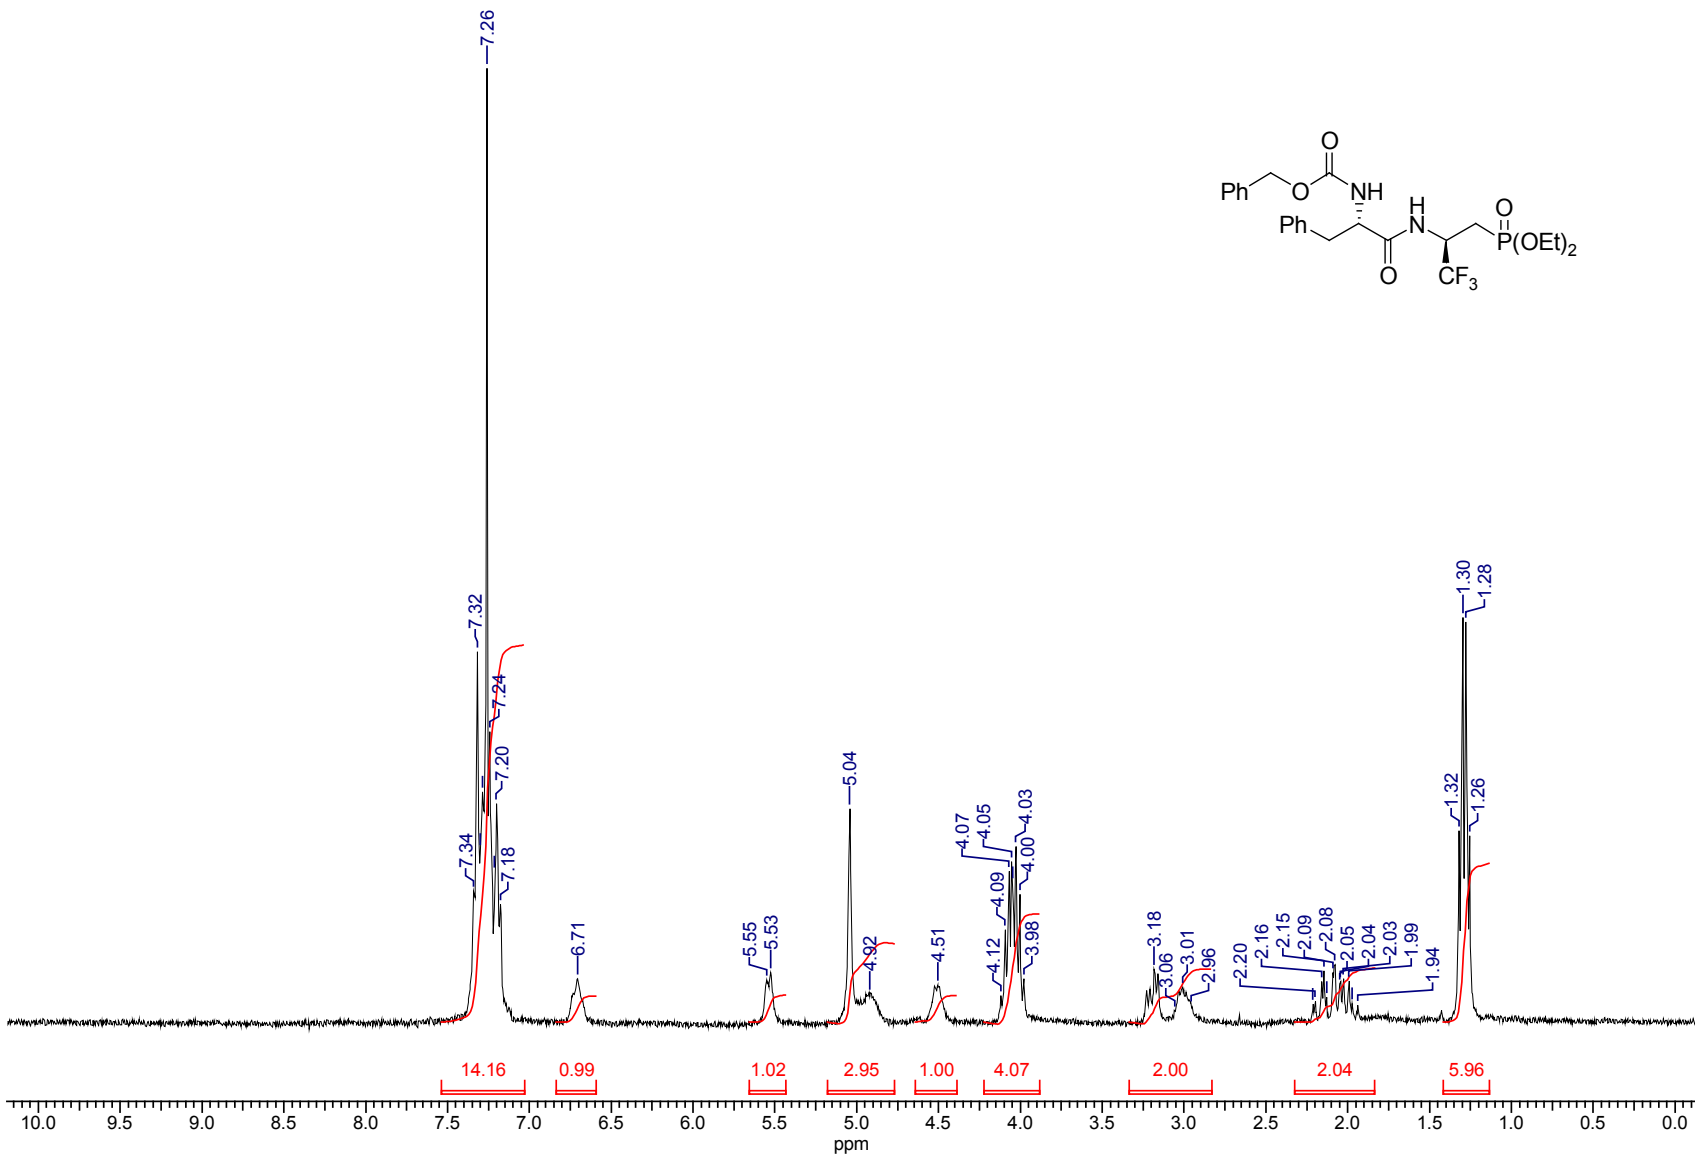

|                               |                                                                        |                             |                                |                              |                         |                      |       |
|-------------------------------|------------------------------------------------------------------------|-----------------------------|--------------------------------|------------------------------|-------------------------|----------------------|-------|
| <b>Acquisition Time (sec)</b> | 0.6816                                                                 | <b>Comment</b>              | 13C APT NMR Spectrum, in CDCl3 |                              | <b>Date</b>             | 27 Jun 2012 11:33:20 |       |
| <b>File Name</b>              | C:\Nuts\Data\Spectra-Aminophosphonates\Peptide PhAla13C-APT13C-APT.fid |                             |                                | <b>Frequency (MHz)</b>       | 100.62                  |                      |       |
| <b>Nucleus</b>                | 13C                                                                    | <b>Number of Transients</b> | 532                            | <b>Original Points Count</b> | 32768                   | <b>Points Count</b>  | 32768 |
| <b>Pulse Sequence</b>         | jmod                                                                   | <b>Solvent</b>              | CHLOROFORM-D                   |                              | <b>Sweep Width (Hz)</b> | 24038.46             |       |
| <b>Temperature (degree C)</b> | 21.706                                                                 |                             |                                |                              |                         |                      |       |

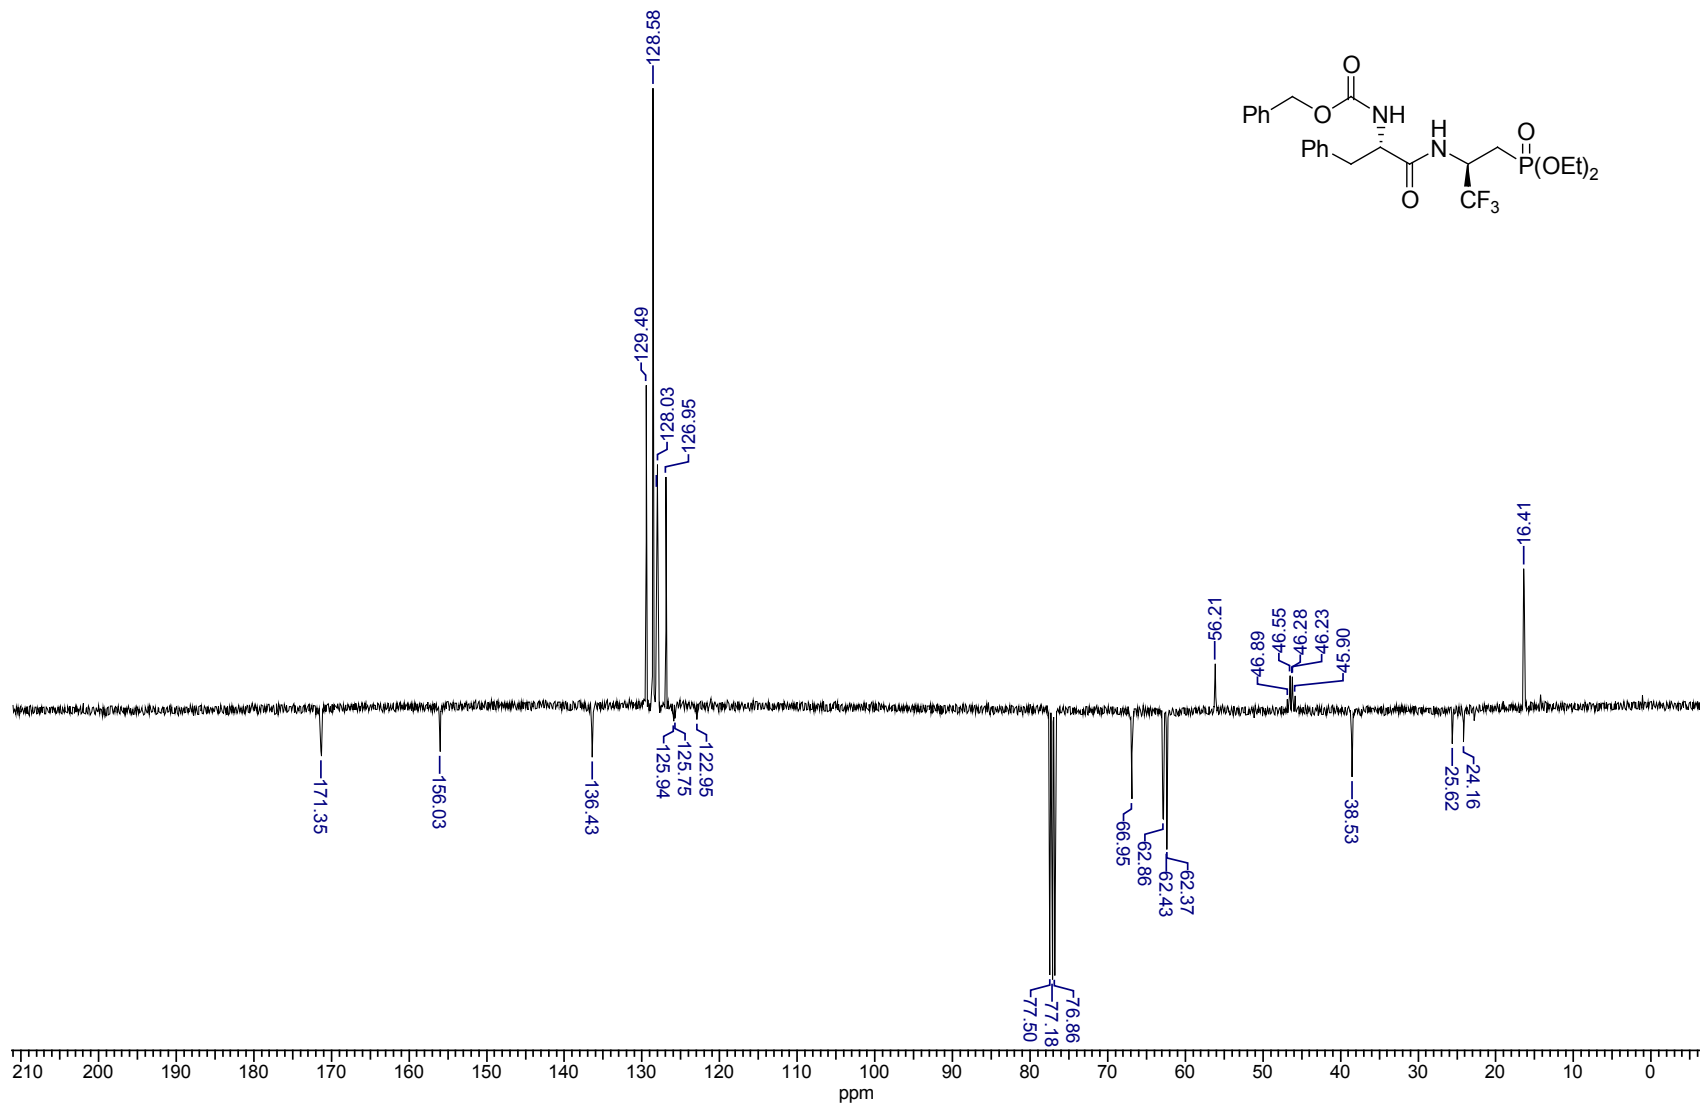

S38

|                               |          |                               |             |                             |                                                               |                              |       |
|-------------------------------|----------|-------------------------------|-------------|-----------------------------|---------------------------------------------------------------|------------------------------|-------|
| <b>Acquisition Time (sec)</b> | 0.3400   | <b>Date</b>                   | Jun 12 2012 | <b>File Name</b>            | C:\Nuts\Data\Spectra-Aminophosphonates\Peptide PhAla\P_83-F19 |                              |       |
| <b>Frequency (MHz)</b>        | 376.29   | <b>Nucleus</b>                | 19F         | <b>Number of Transients</b> | 4                                                             | <b>Original Points Count</b> | 64000 |
| <b>Points Count</b>           | 65536    | <b>Pulse Sequence</b>         | s2pul       | <b>Solvent</b>              | CHLOROFORM-D                                                  |                              |       |
| <b>Sweep Width (Hz)</b>       | 94117.65 | <b>Temperature (degree C)</b> | 20.000      |                             |                                                               |                              |       |

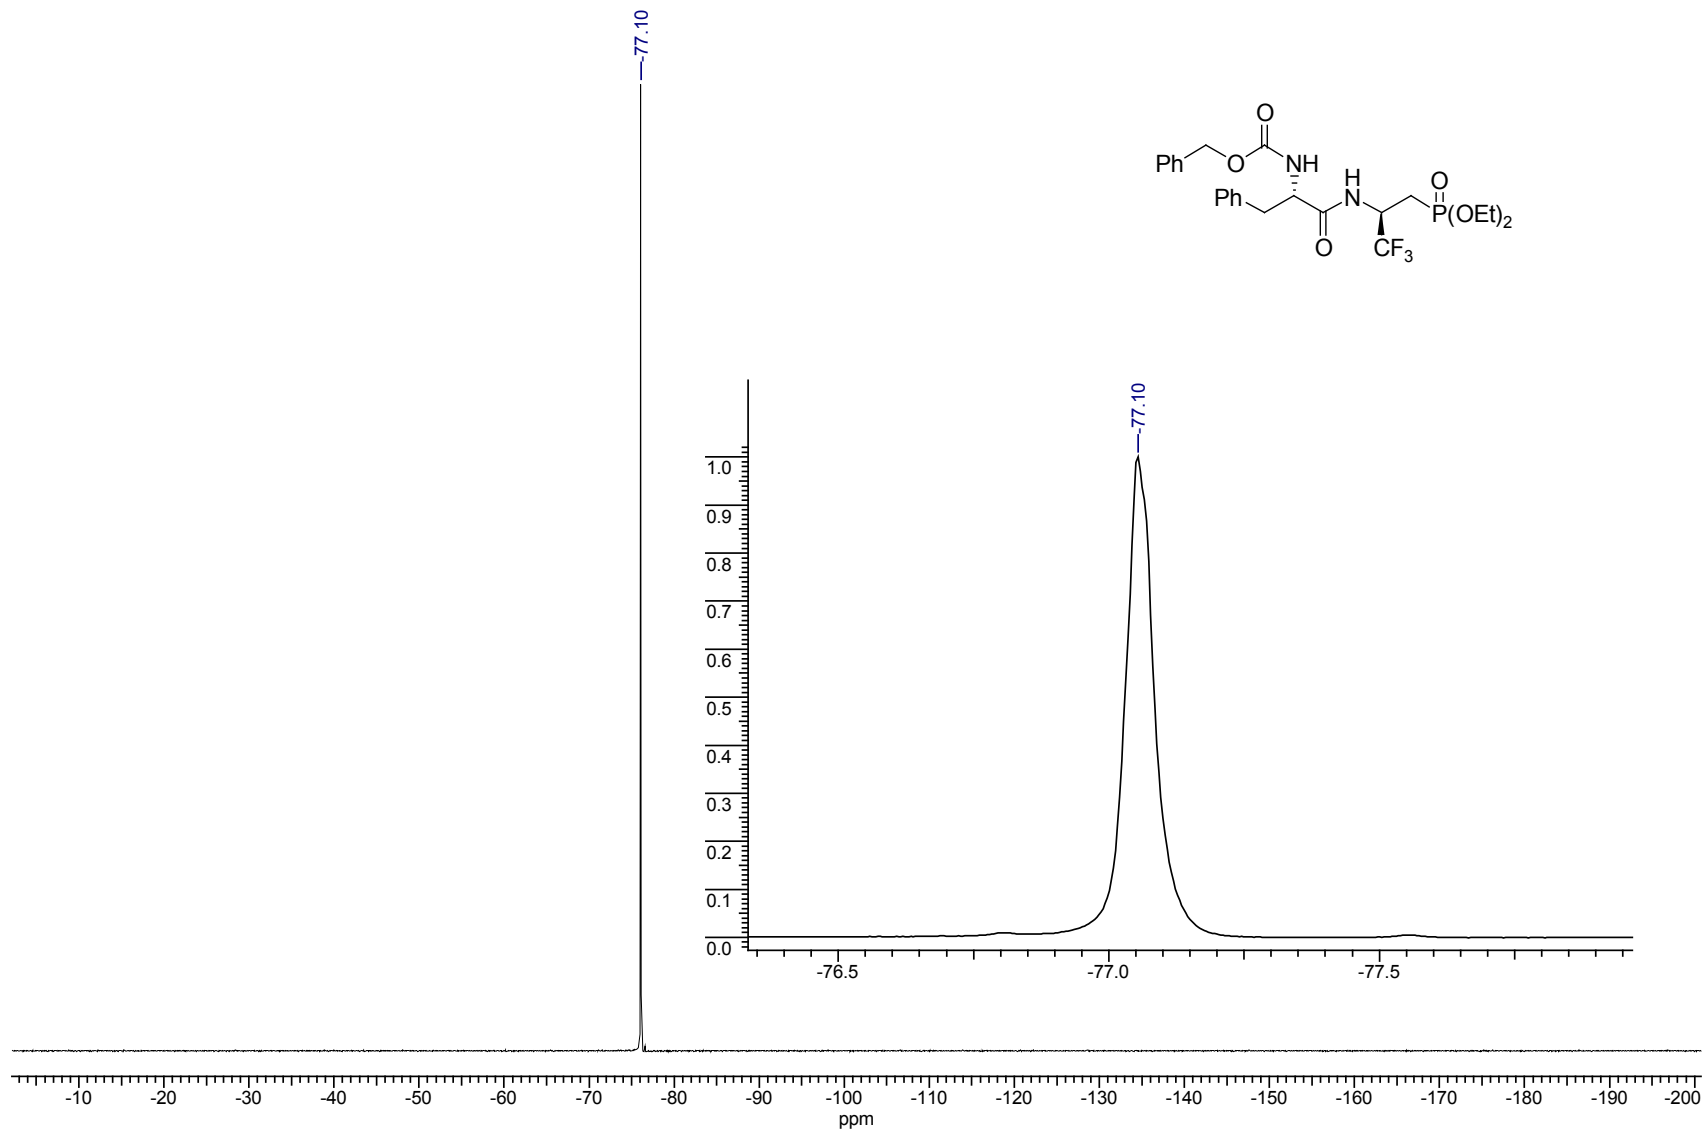

S39

|                                                                                                   |                                     |                                    |
|---------------------------------------------------------------------------------------------------|-------------------------------------|------------------------------------|
| <b>Acquisition Time (sec)</b> 0.5000                                                              | <b>Comment</b> Imported from UXNMR. | <b>Date</b> 08 Jun 2012 09:48:48   |
| <b>File Name</b> C:\Nuts\Data\Spectra-Aminophosphonates\Peptide PhAla\P_83-P31\P_83-P31_001000fid |                                     | <b>Frequency (MHz)</b> 202.44      |
| <b>Nucleus</b> 31P                                                                                | <b>Number of Transients</b> 24      | <b>Original Points Count</b> 80641 |
| <b>Pulse Sequence</b> zg                                                                          | <b>Solvent</b> CHLOROFORM-D         | <b>Points Count</b> 131072         |
|                                                                                                   |                                     | <b>Sweep Width (Hz)</b> 80645.16   |

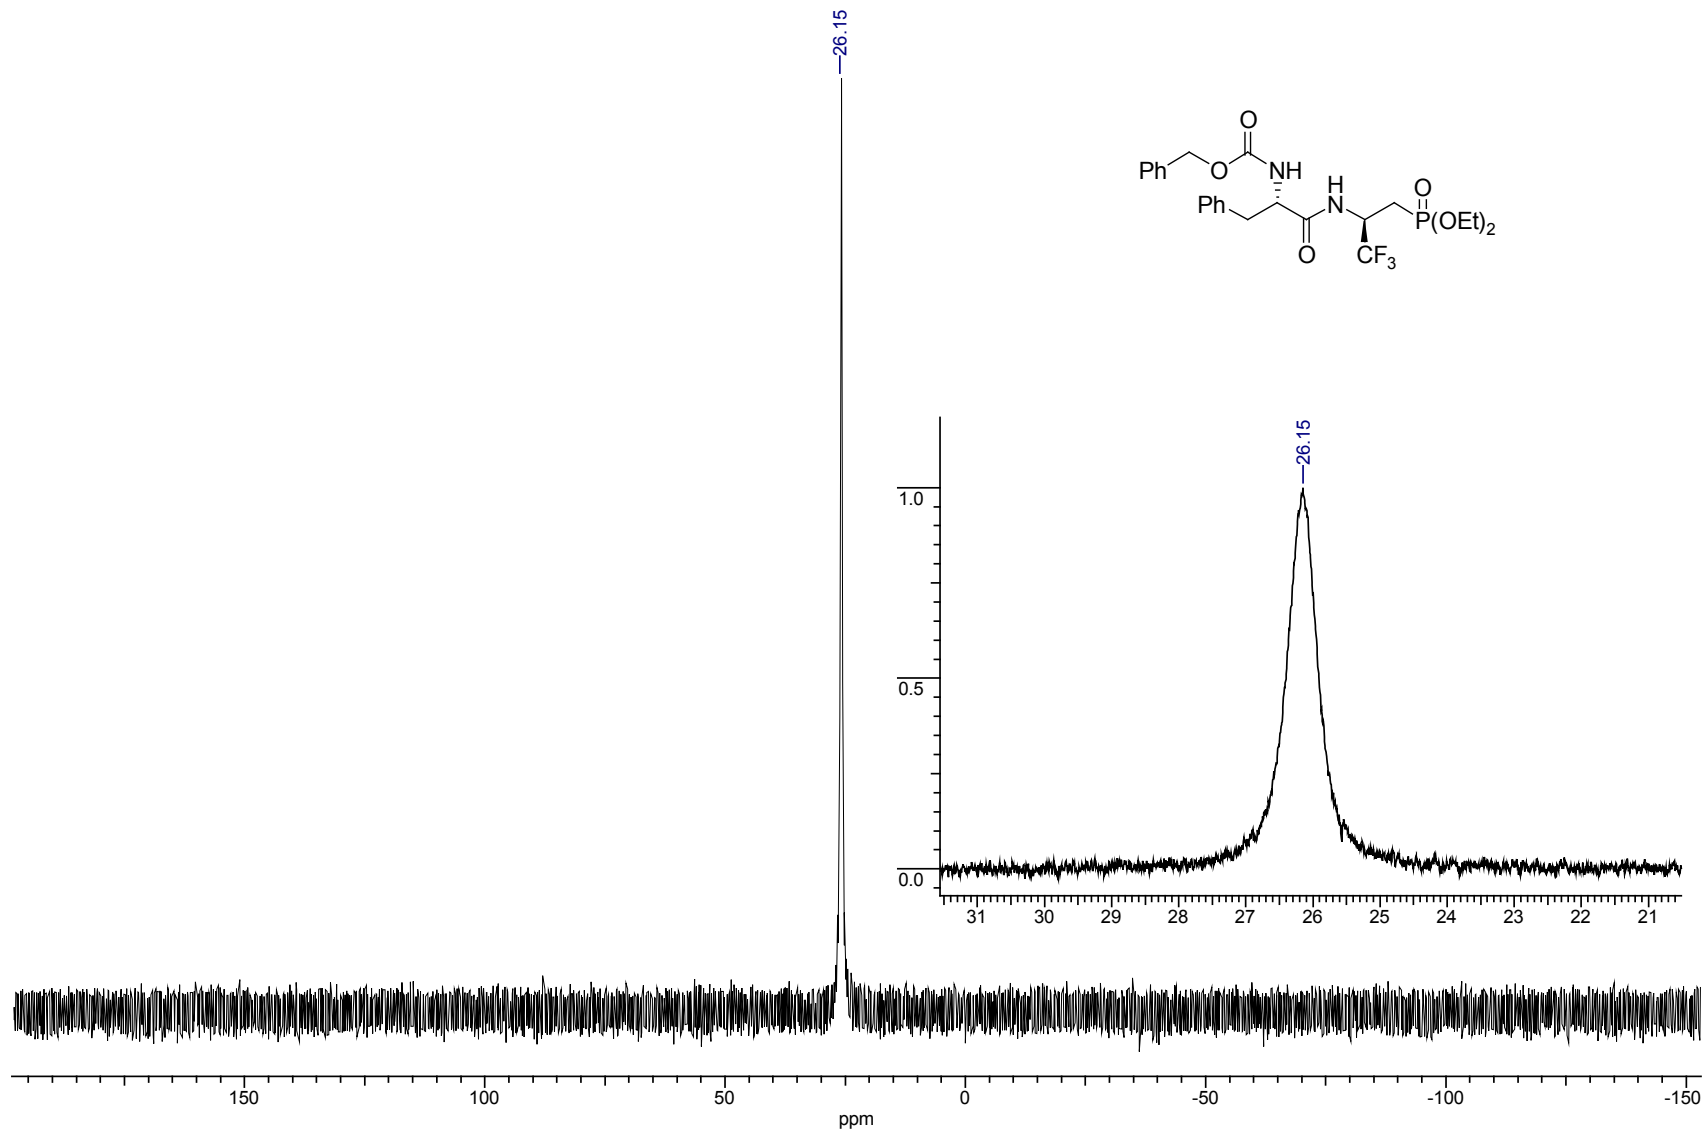

Supplement: c2cc36702e.pdf [file c2cc36702e.pdf]
